# Supplementary figures and images for: Serum Oxylipin Profiles Identify Potential Biomarkers in Patients with Acute Aortic Dissection
Source: MDPI journal article supplement (doi:10.3390/metabo12070587), 2022-06-23

N31

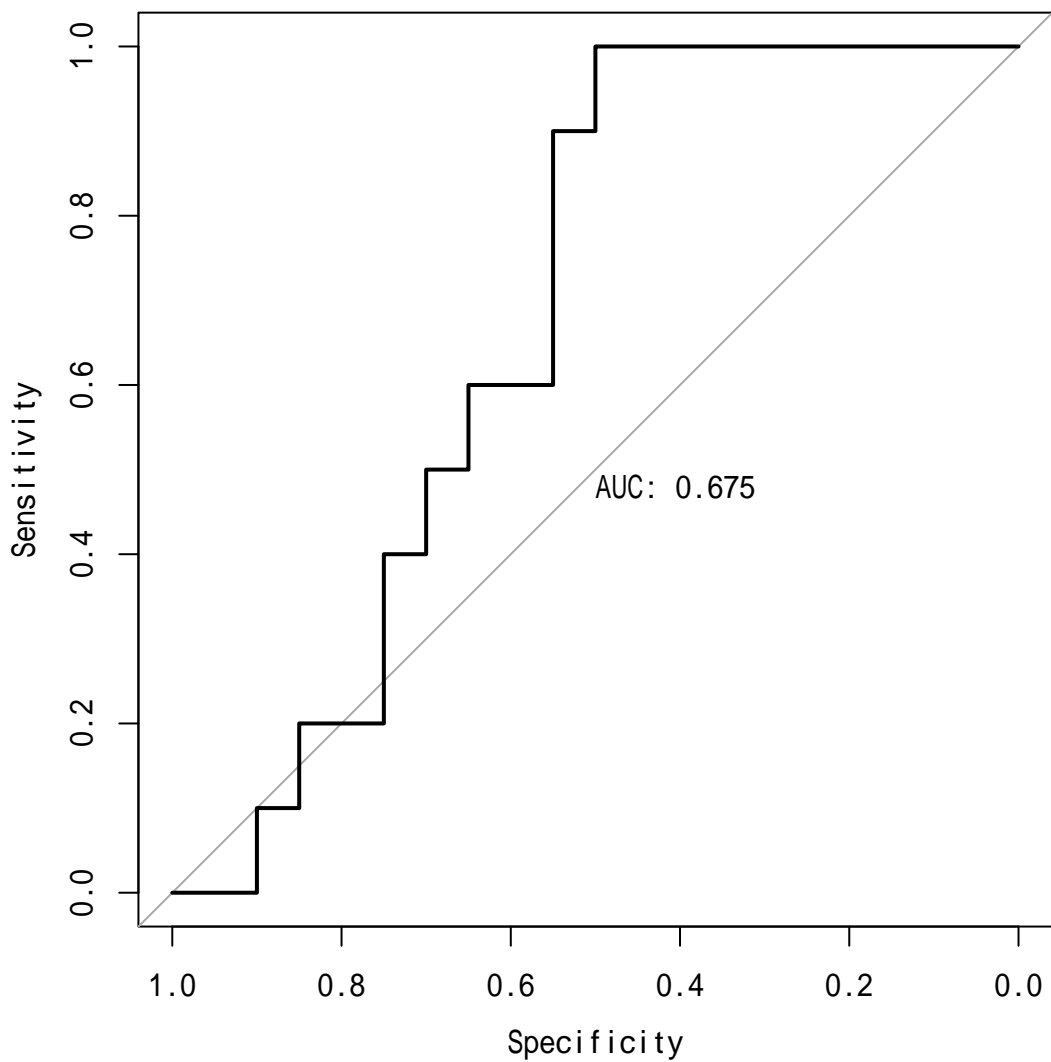

N32

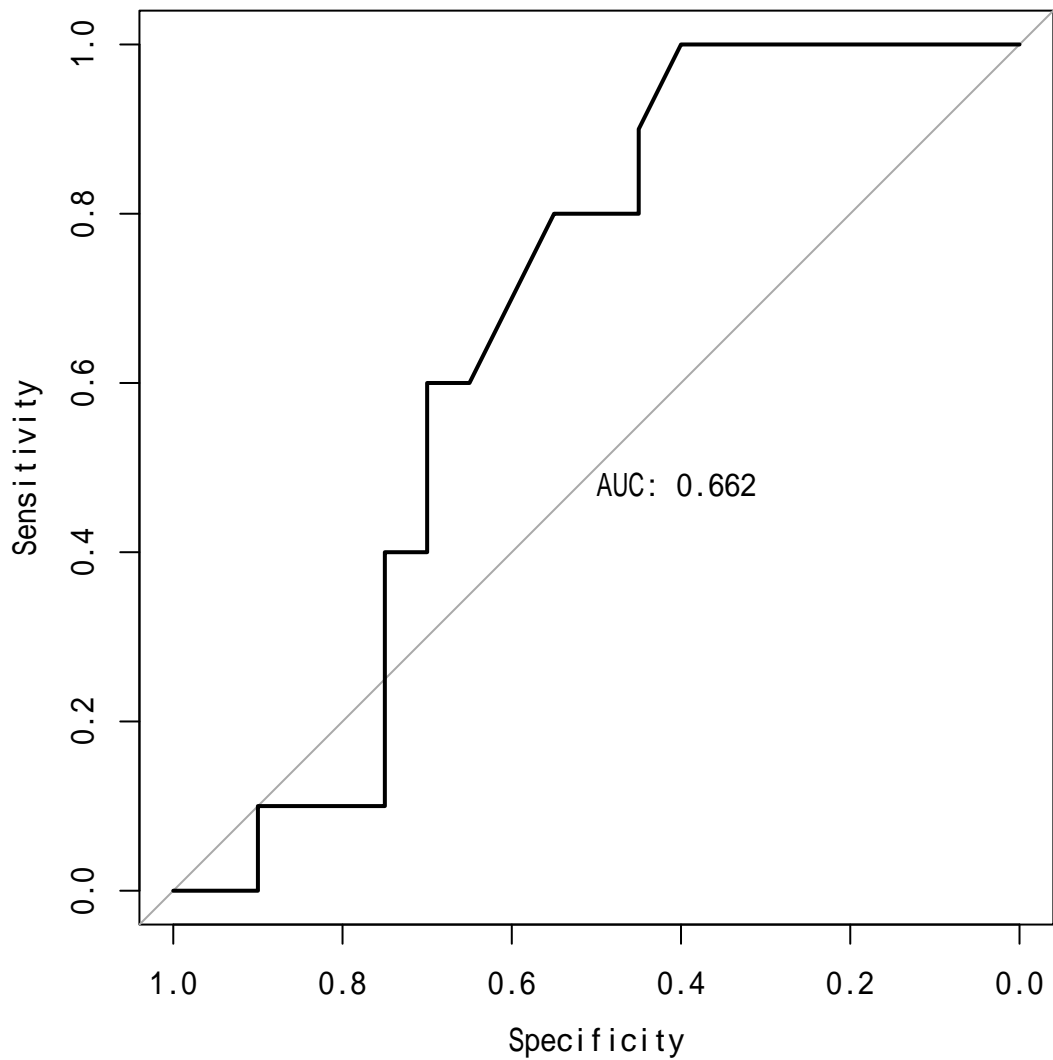

N14

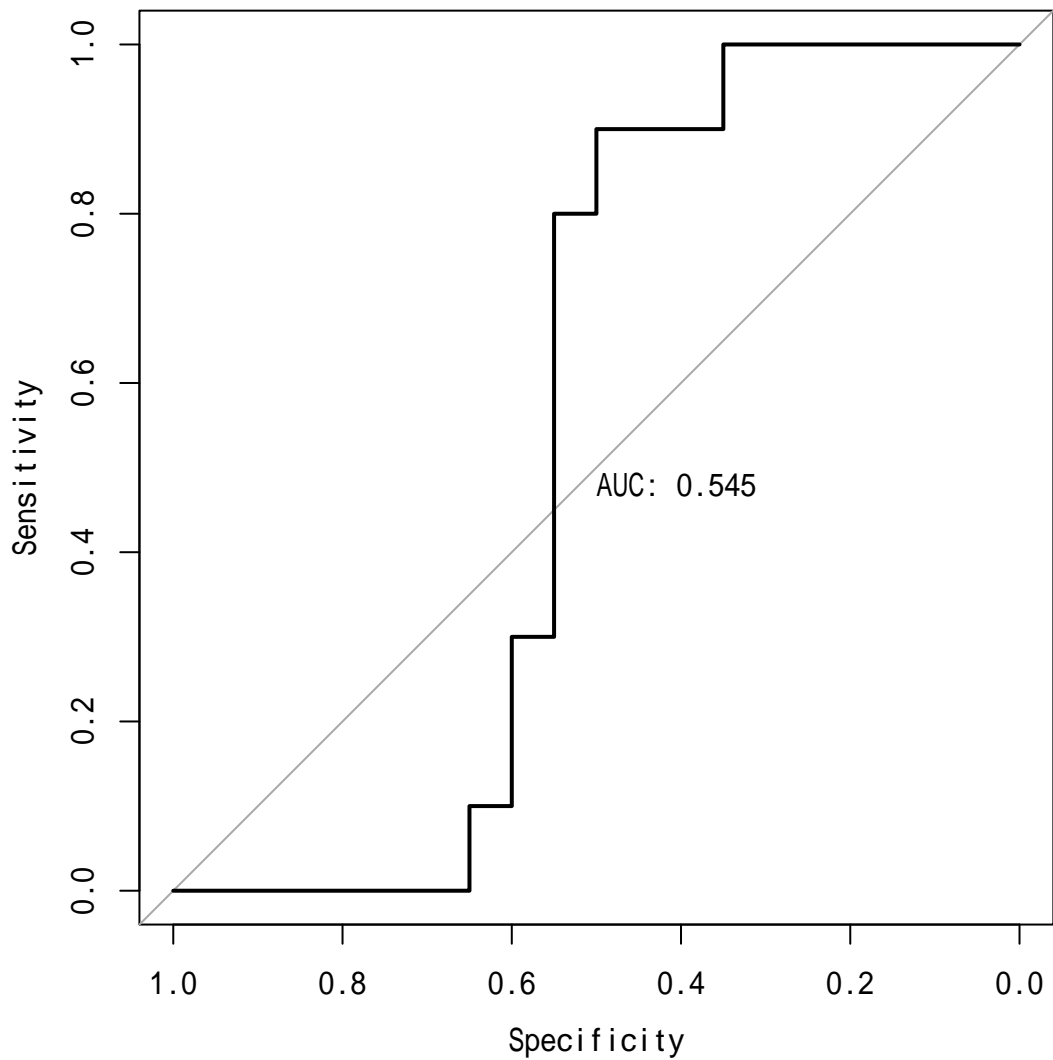

E10

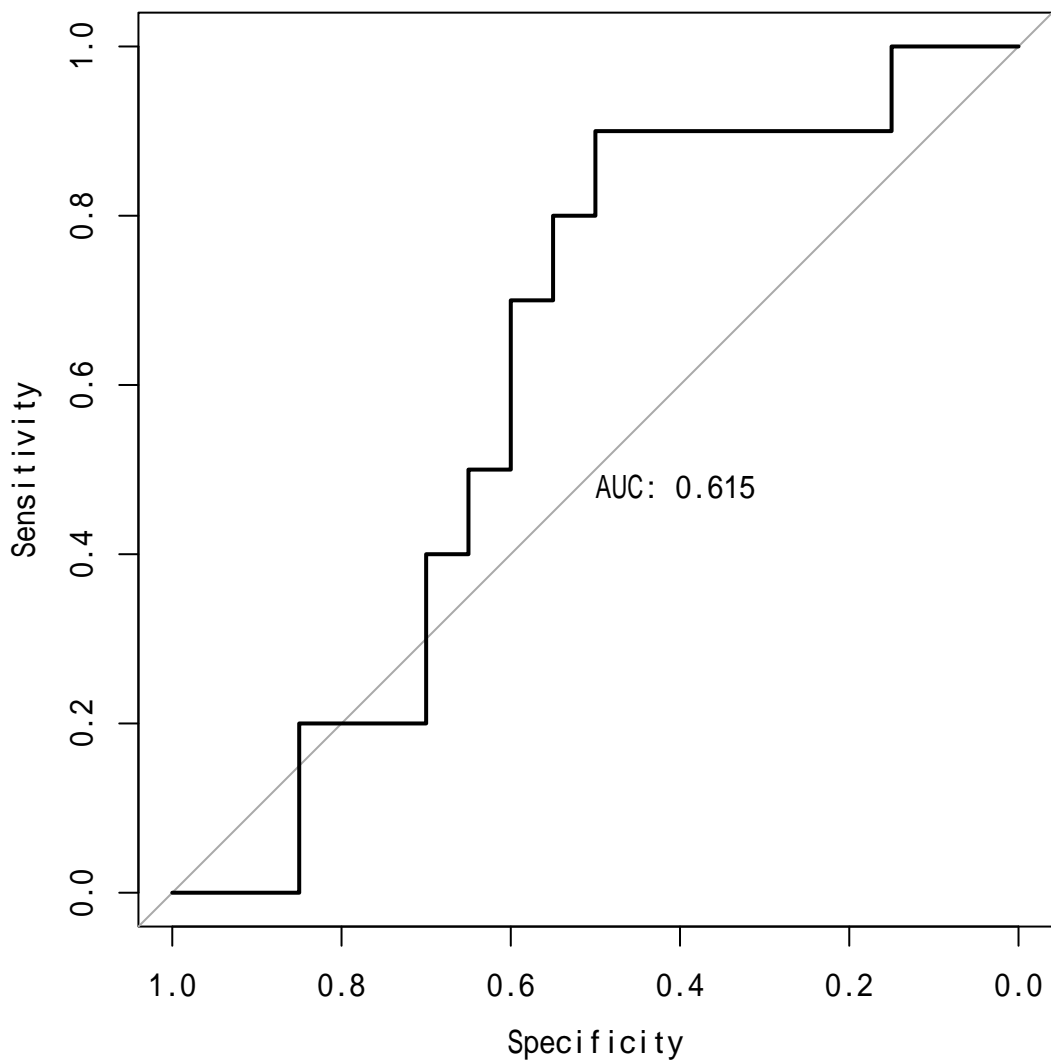

E4

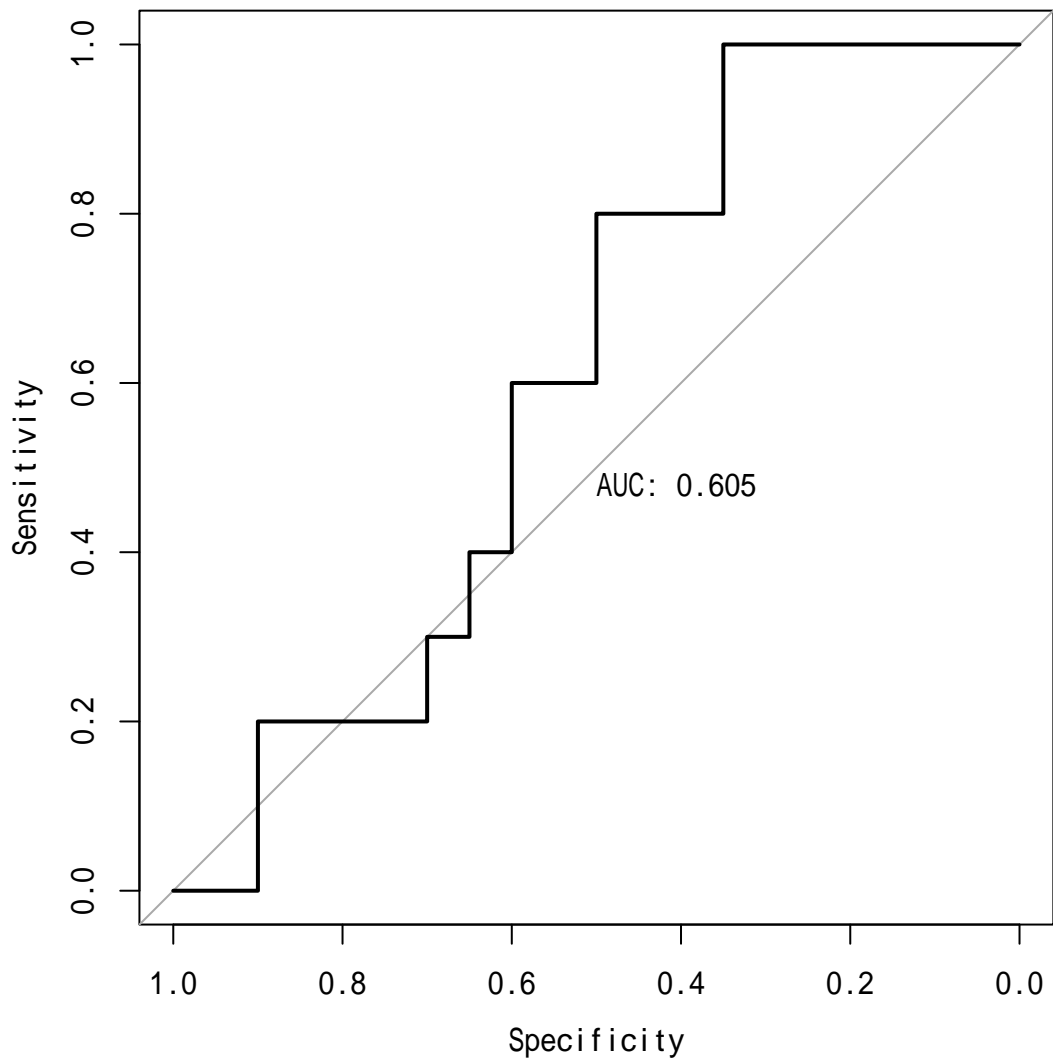

E2

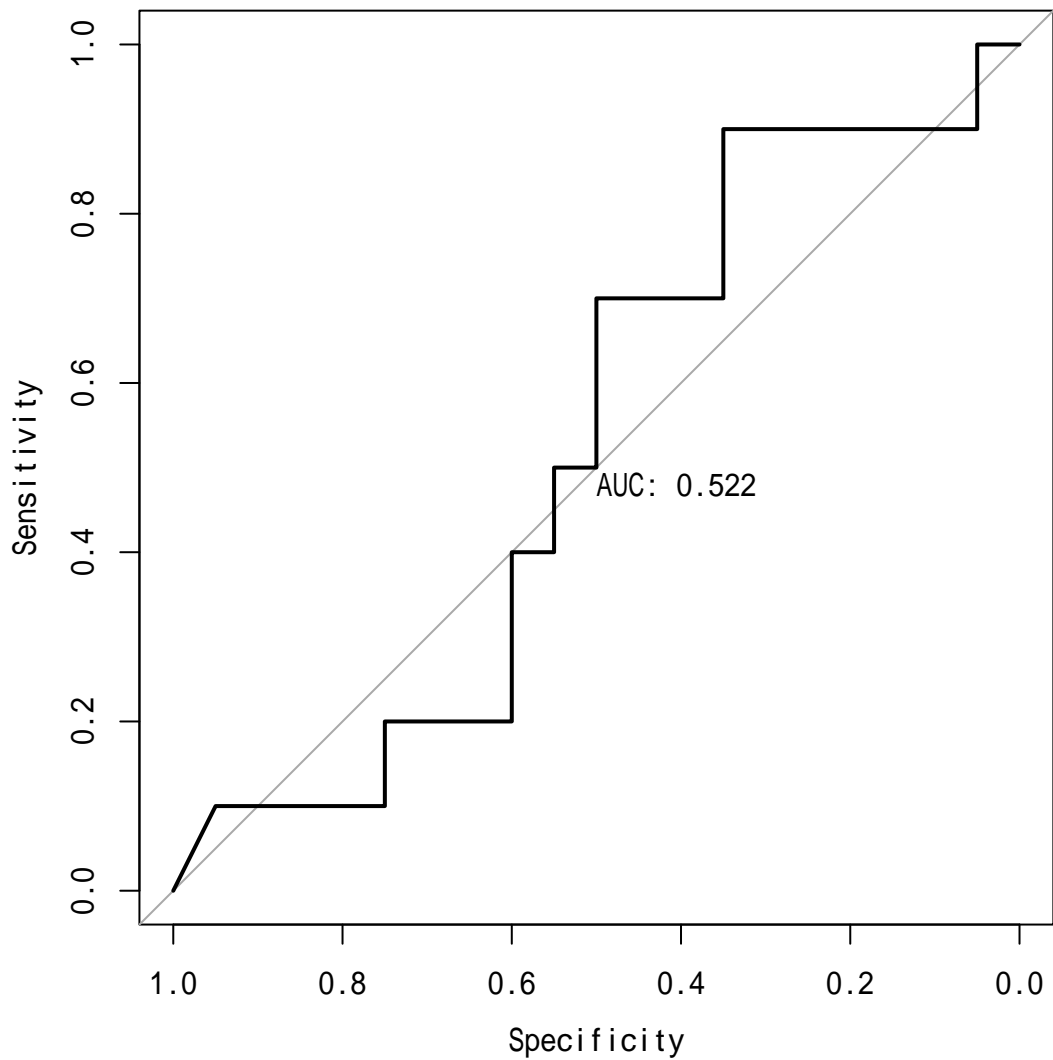

N3

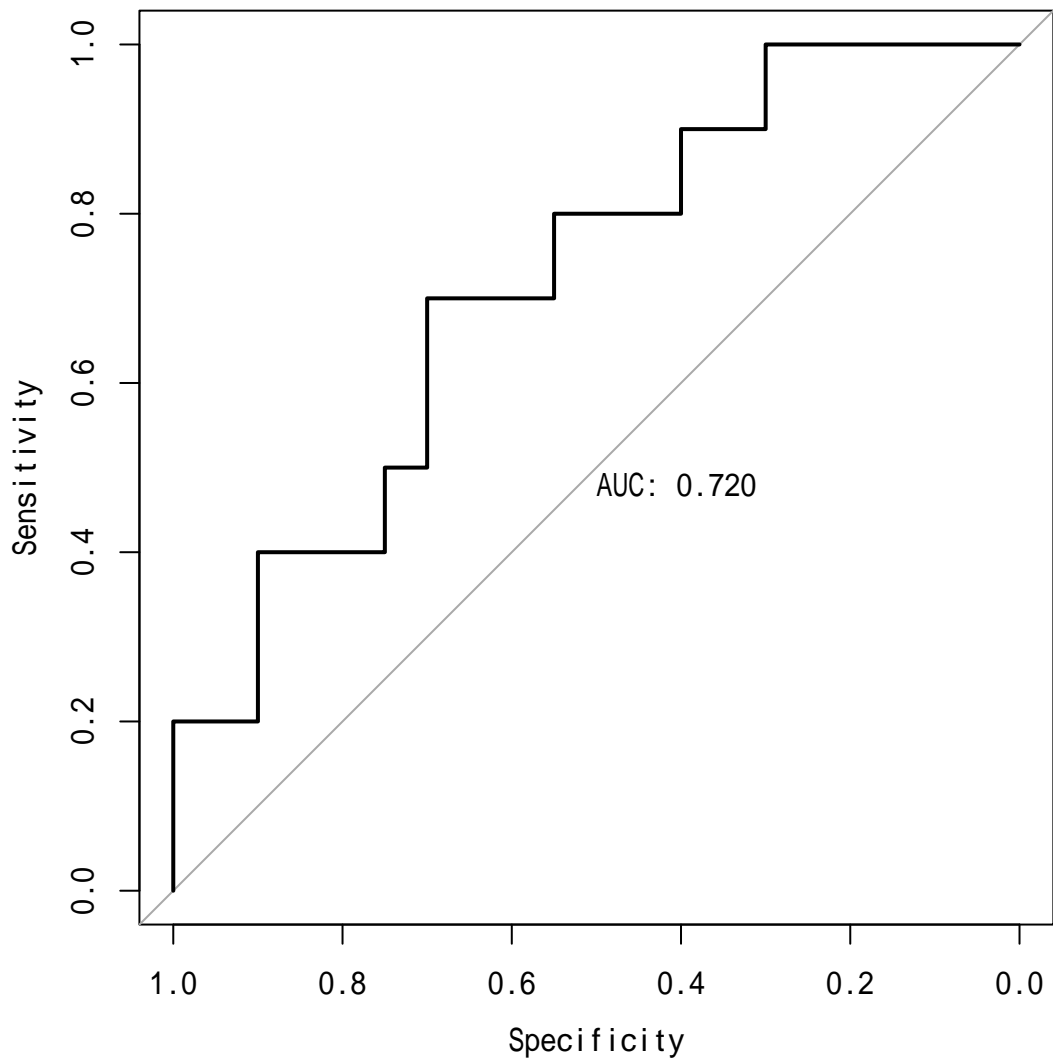

N27

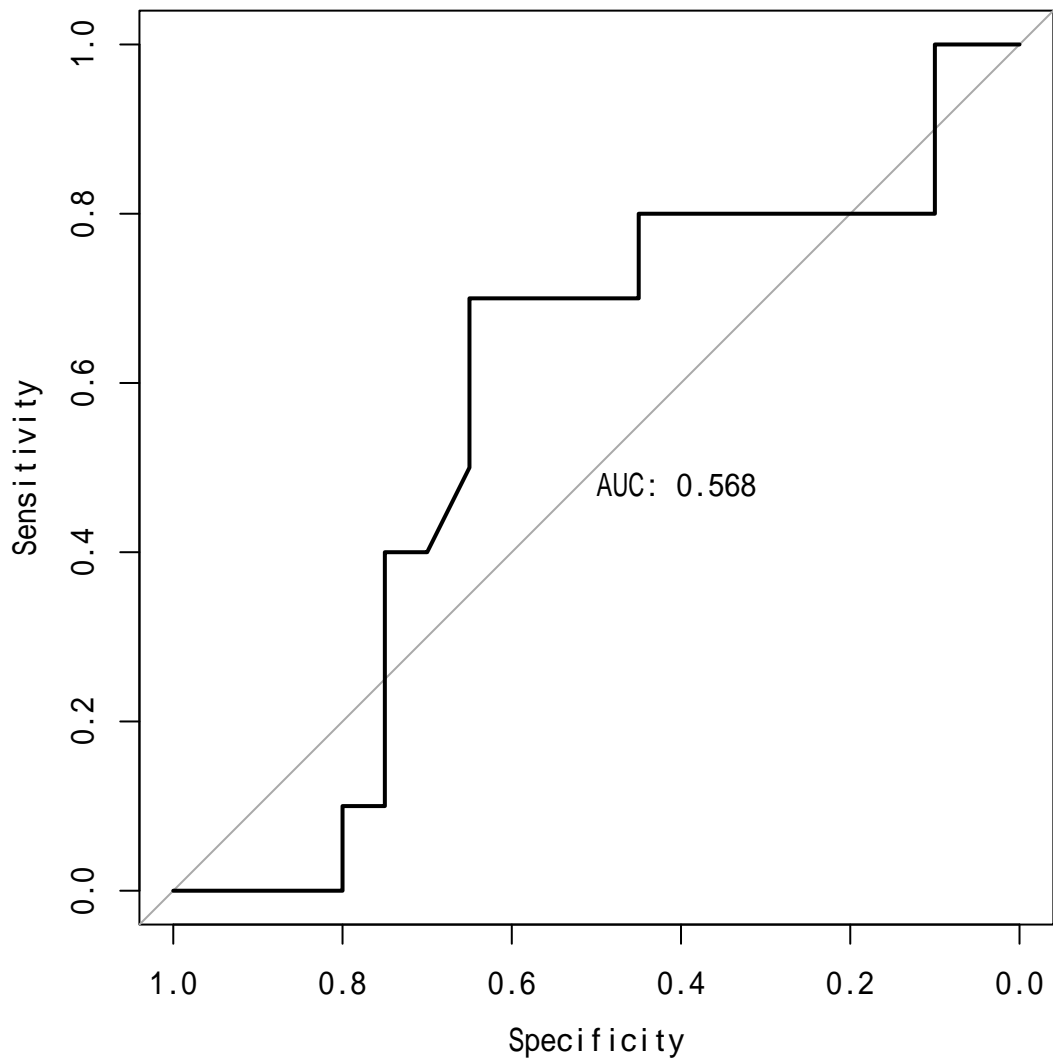



E9

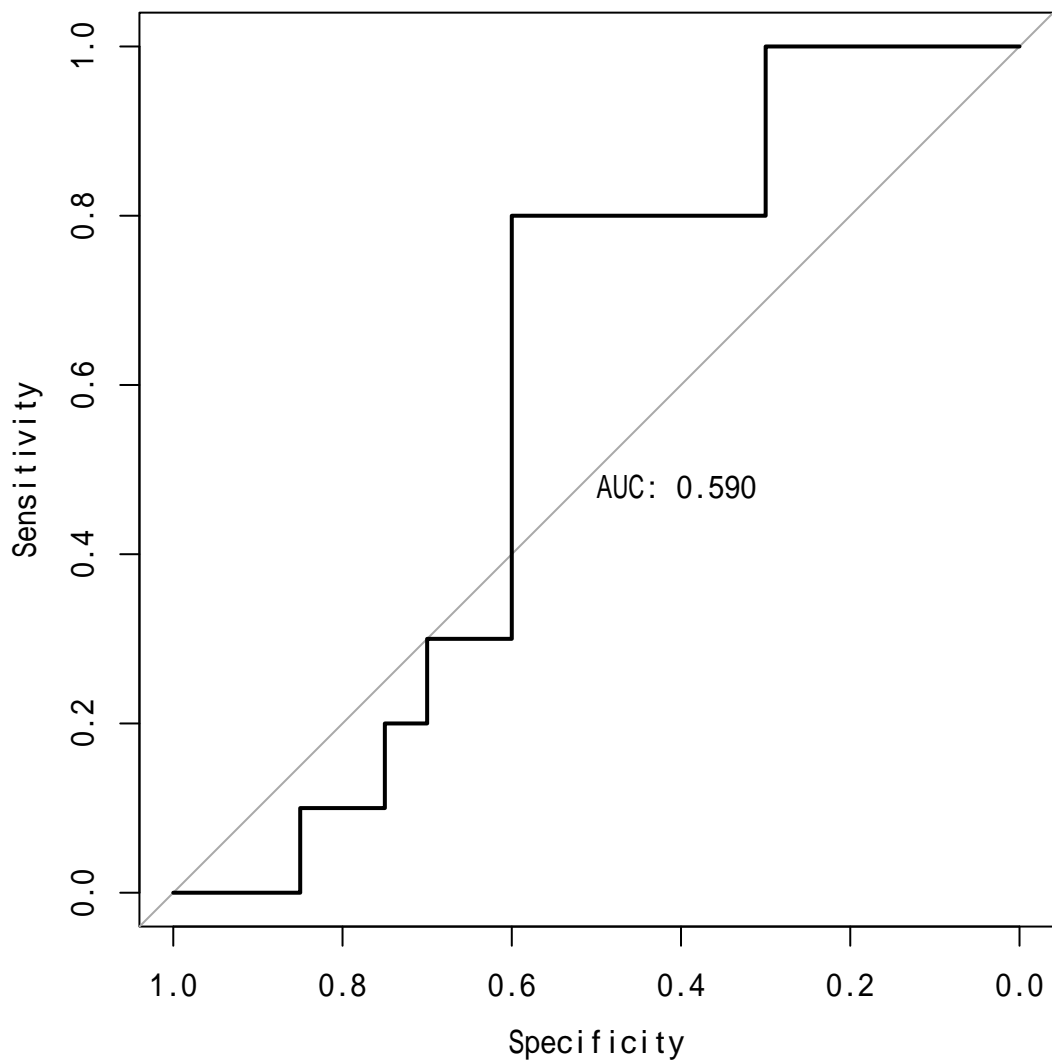

N26

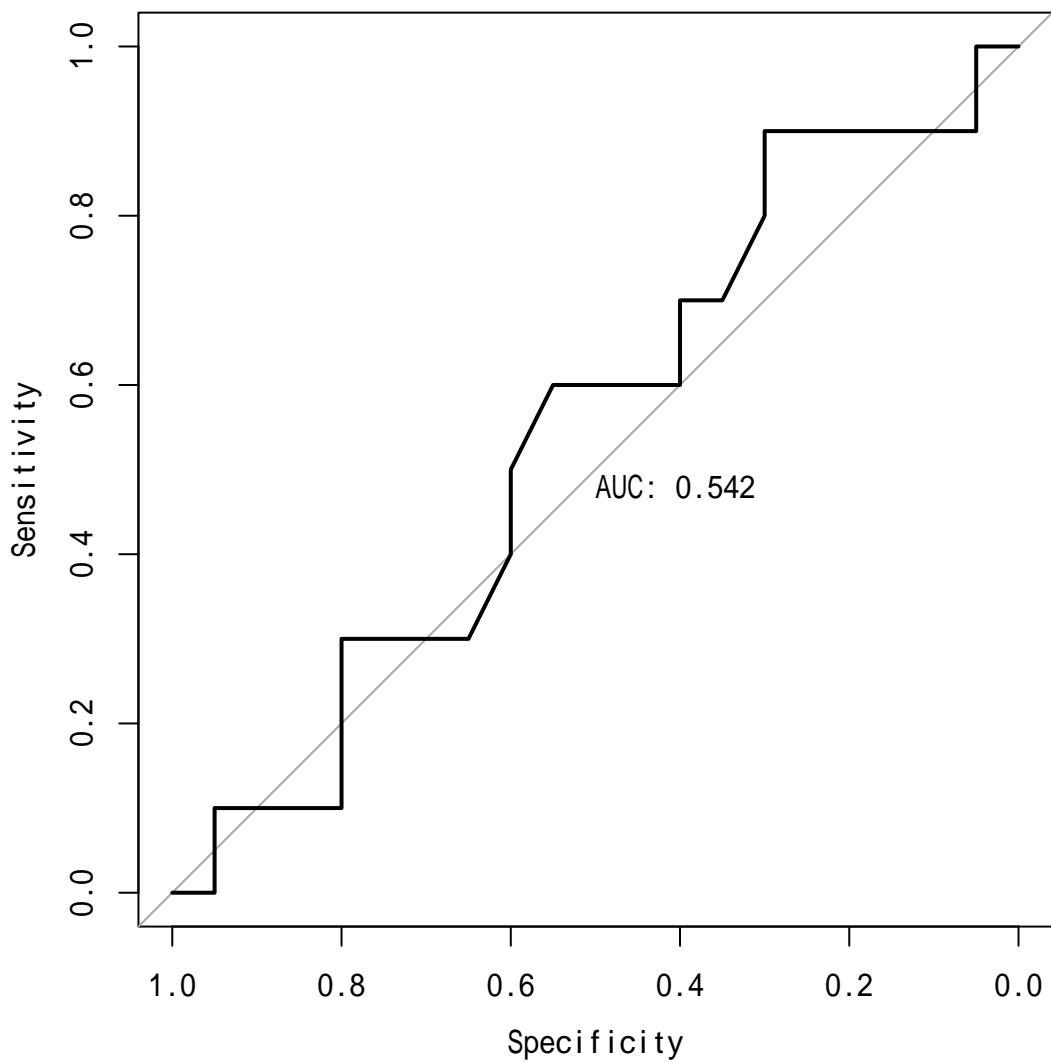

N2

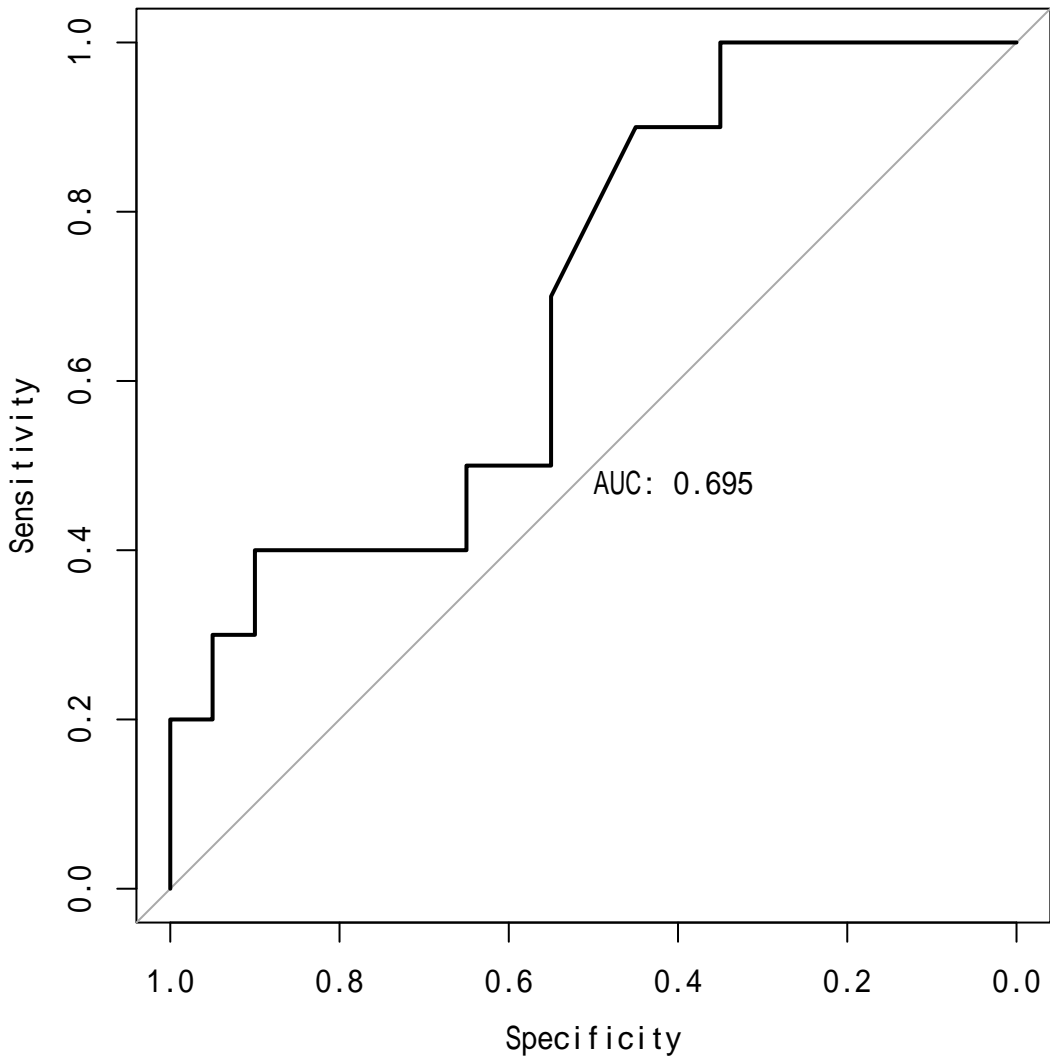

N4

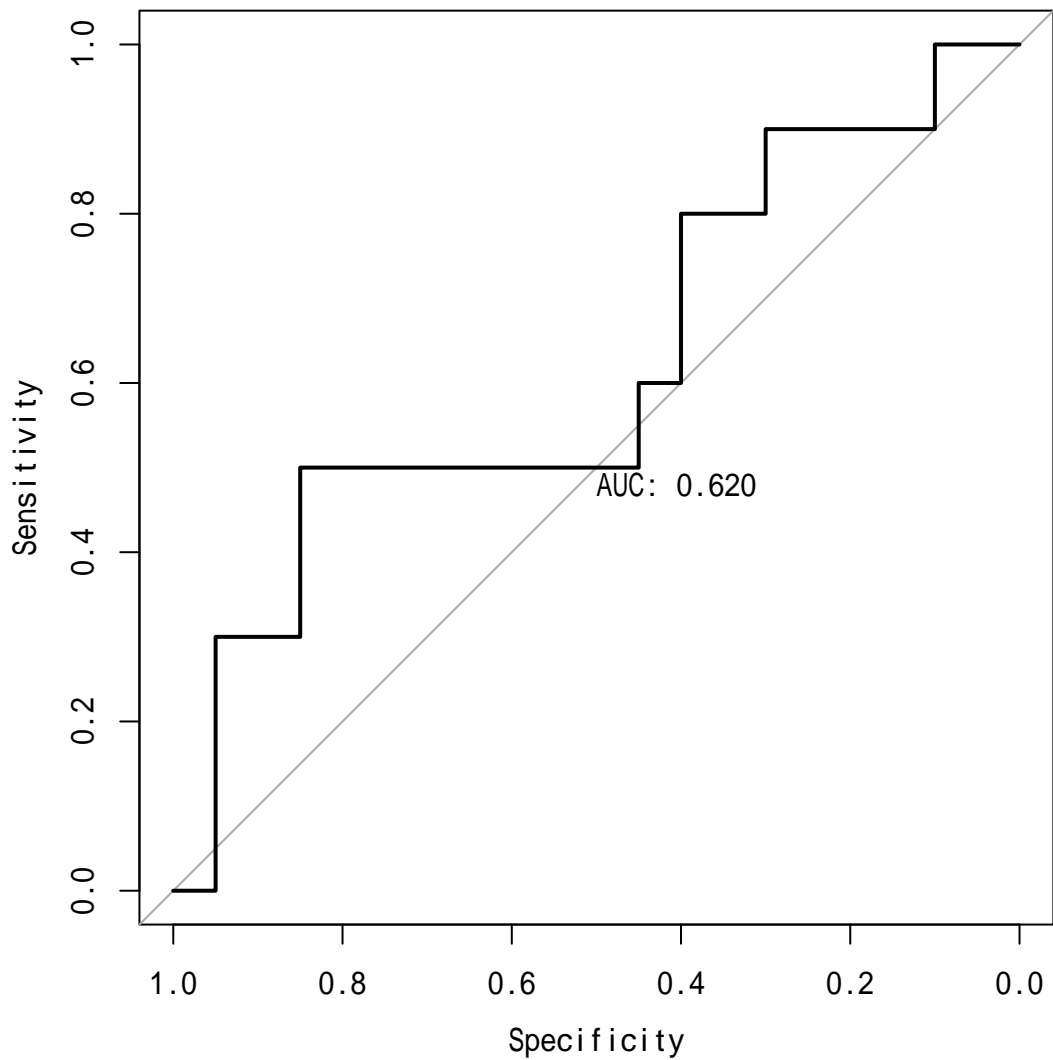

F8

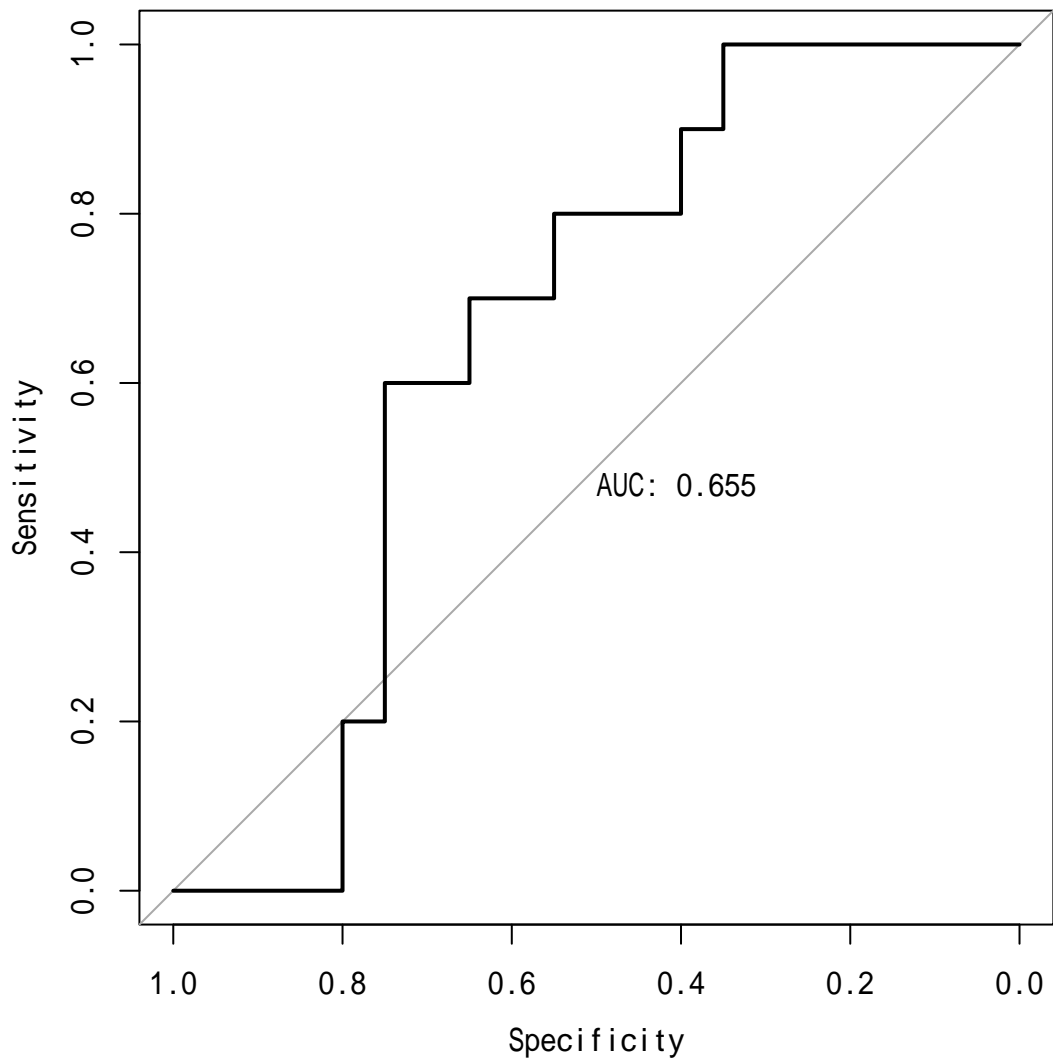

A3

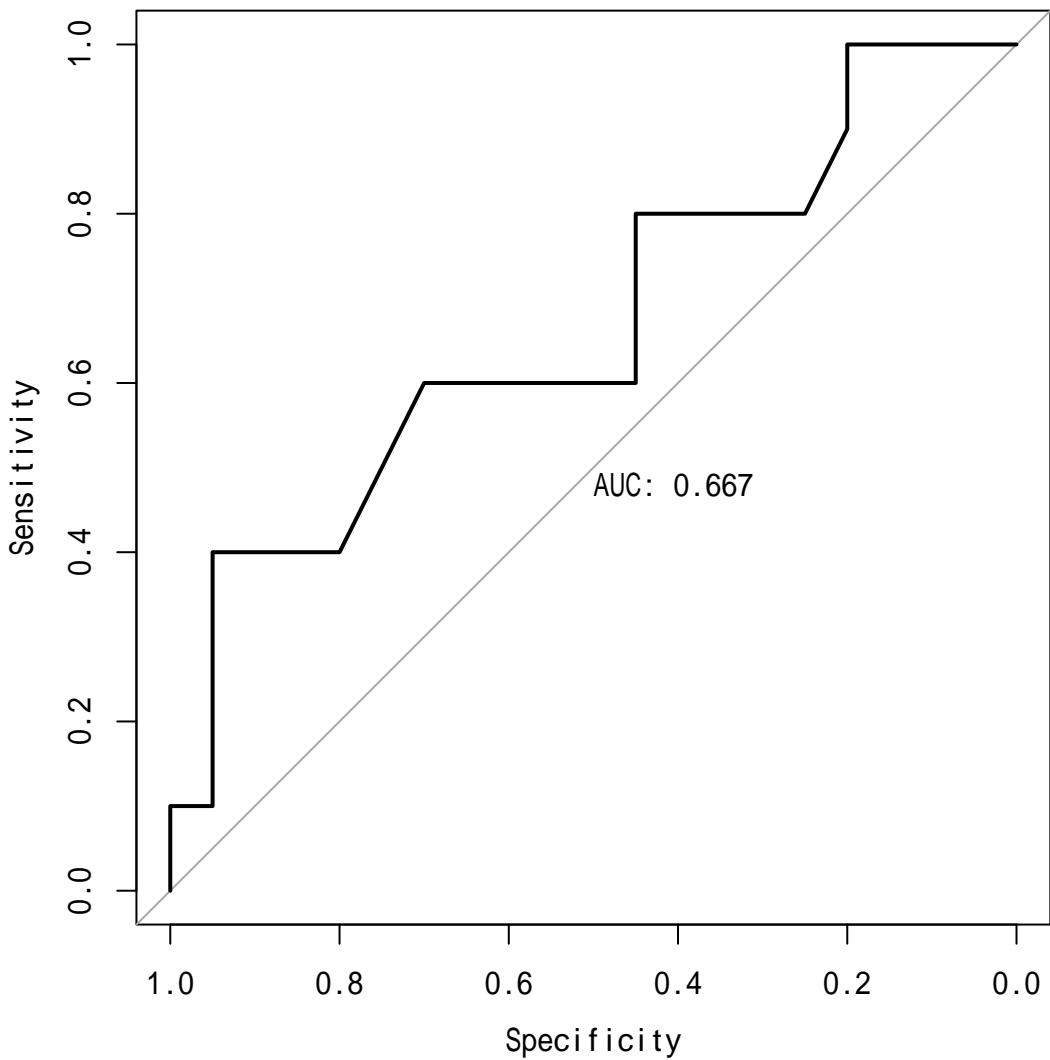

A2

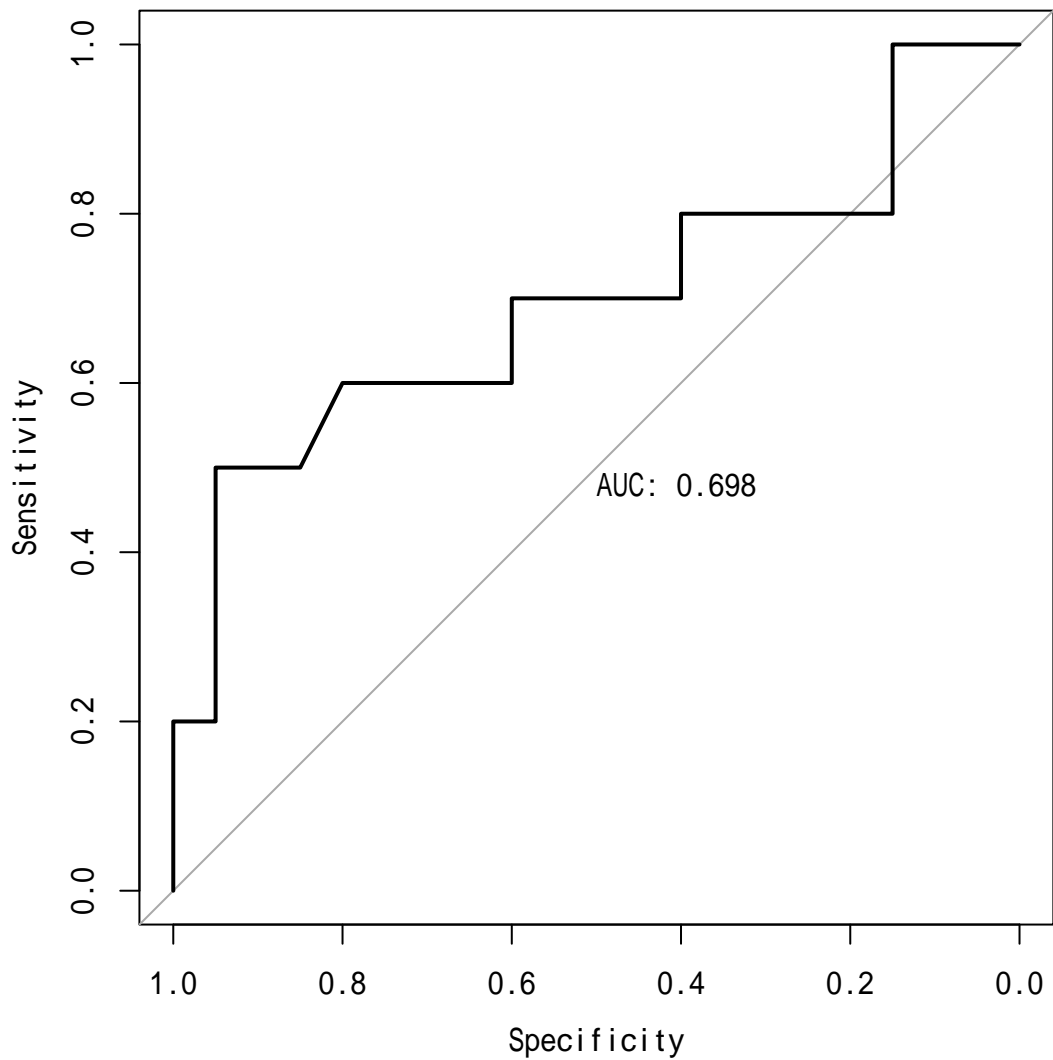

N19

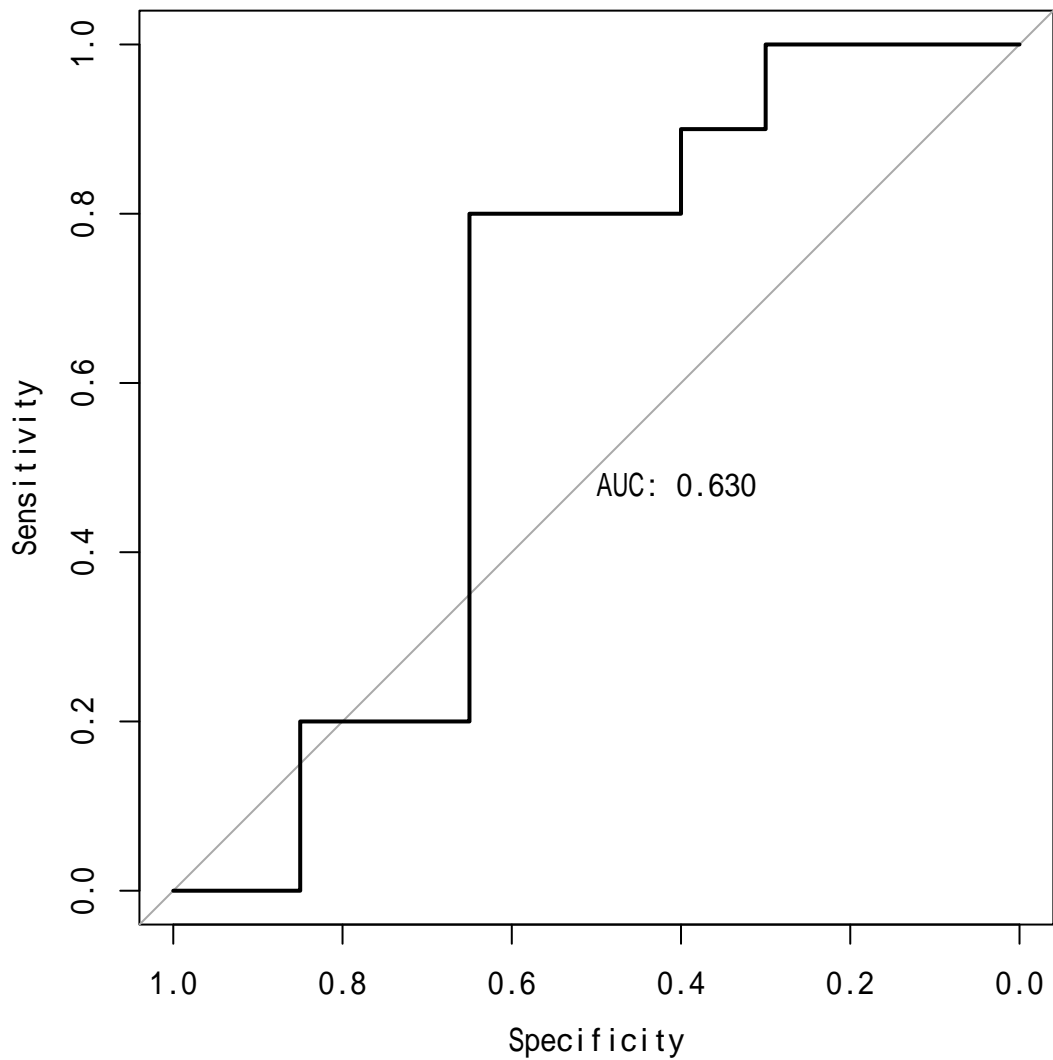



A1

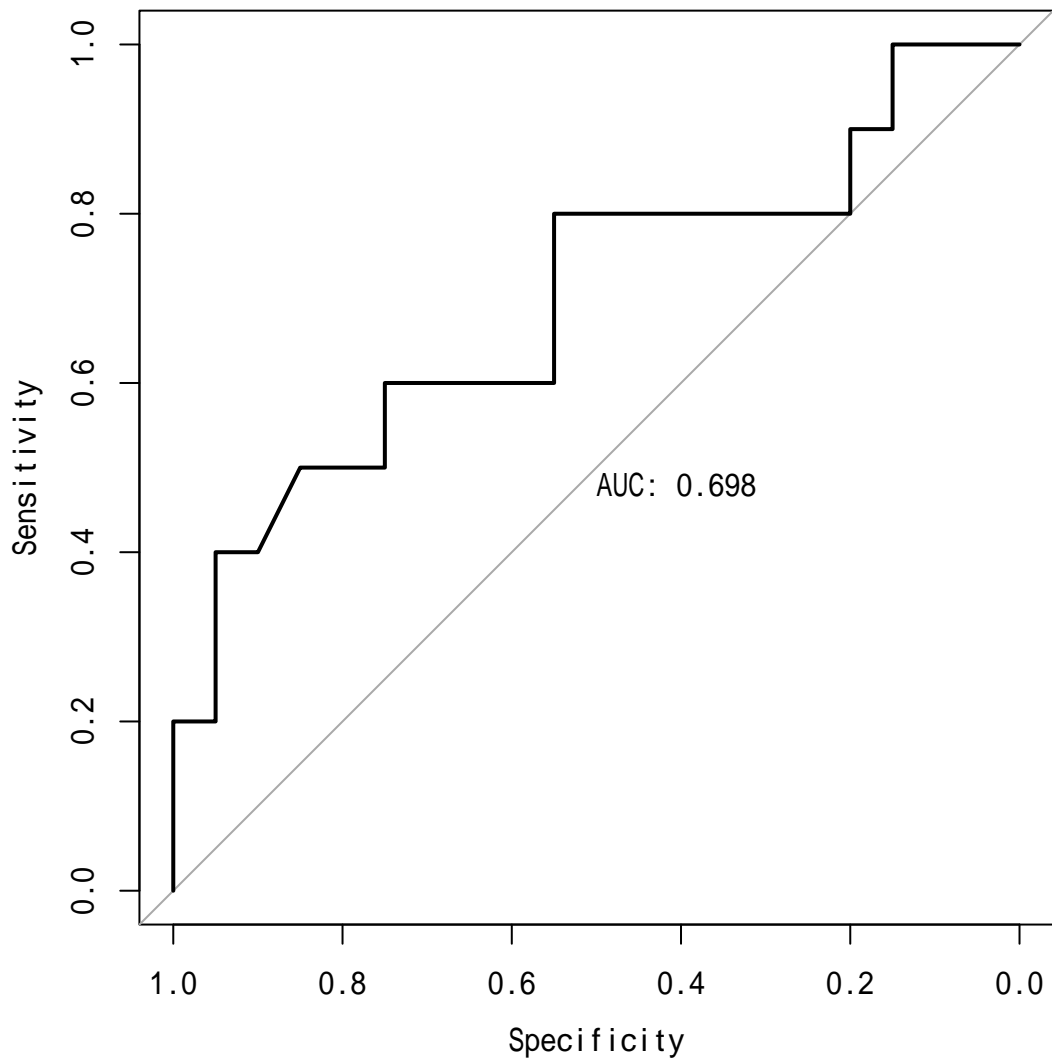

L15

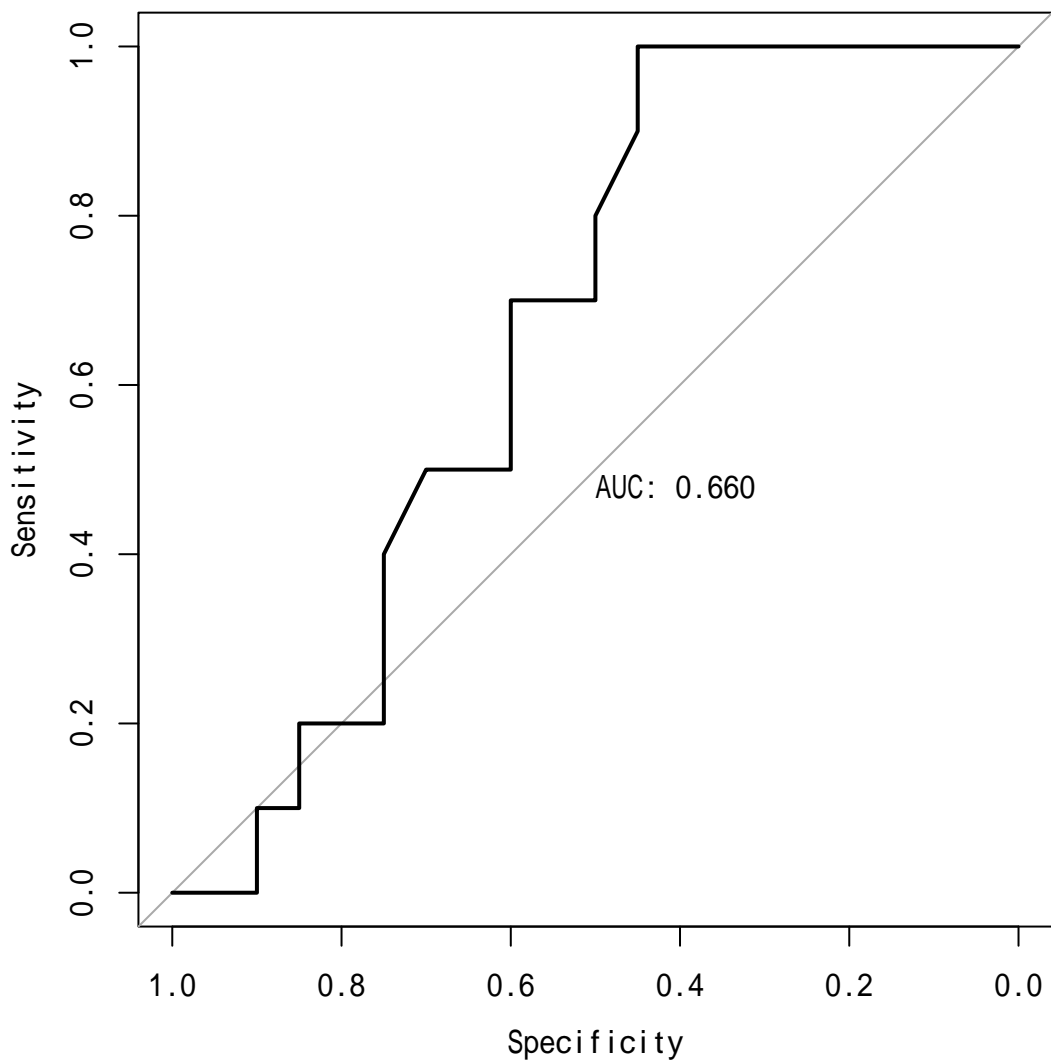

E7

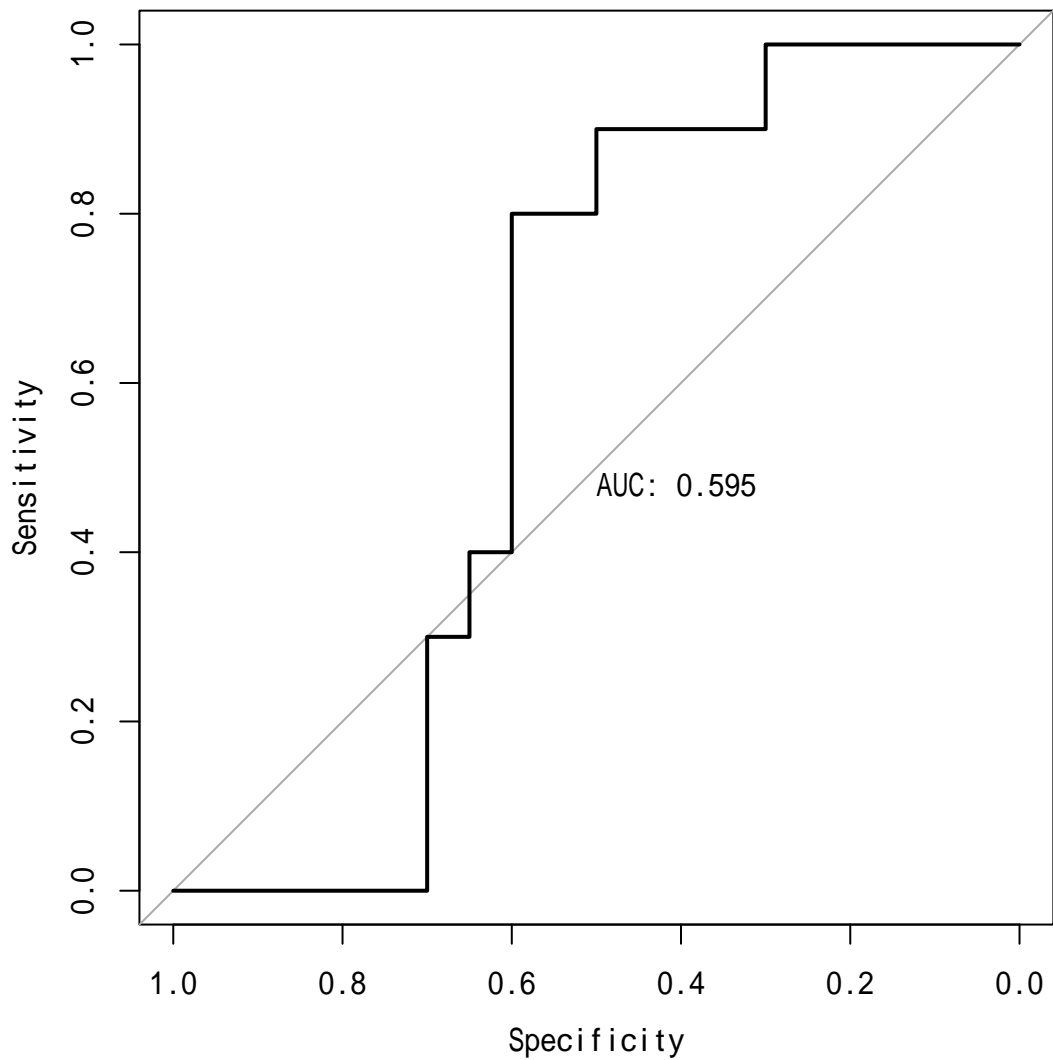

E8

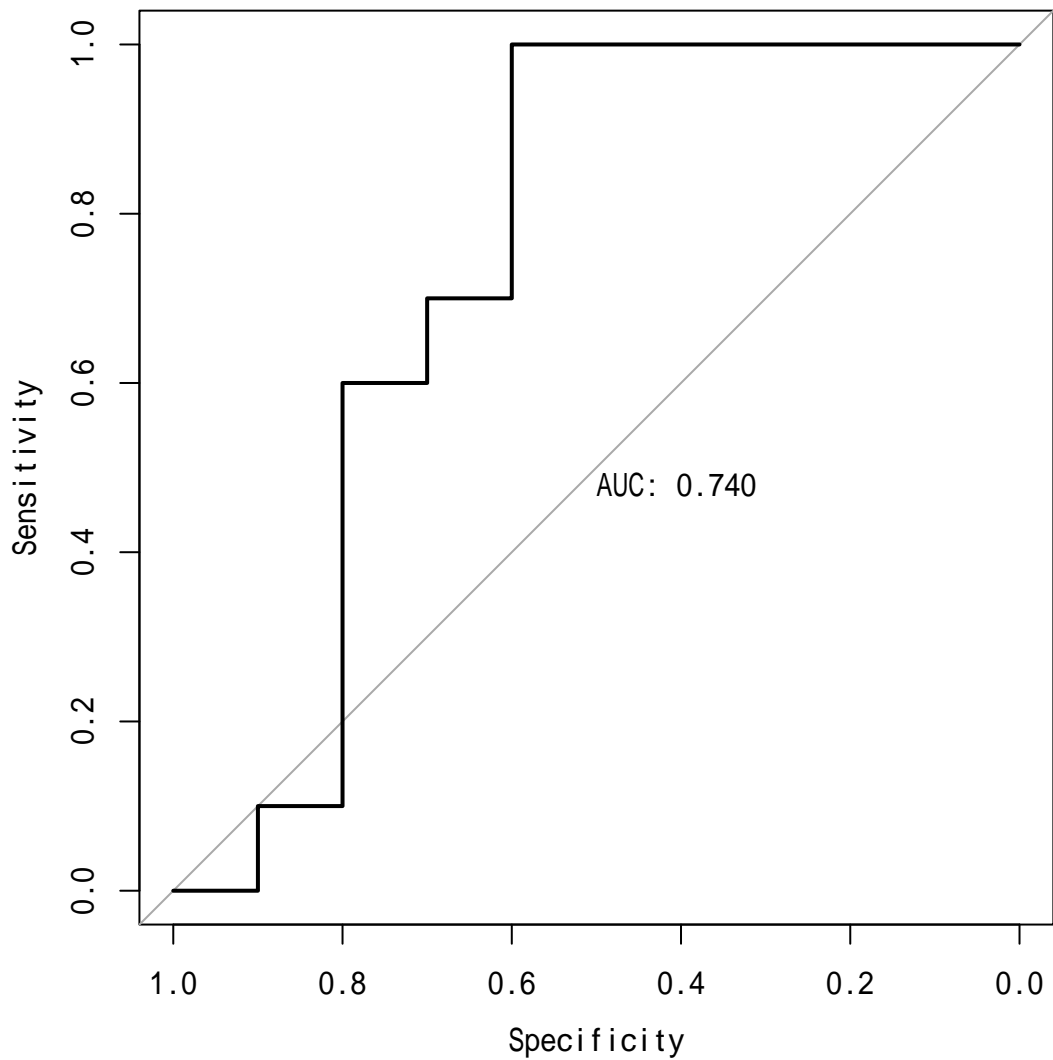

E5

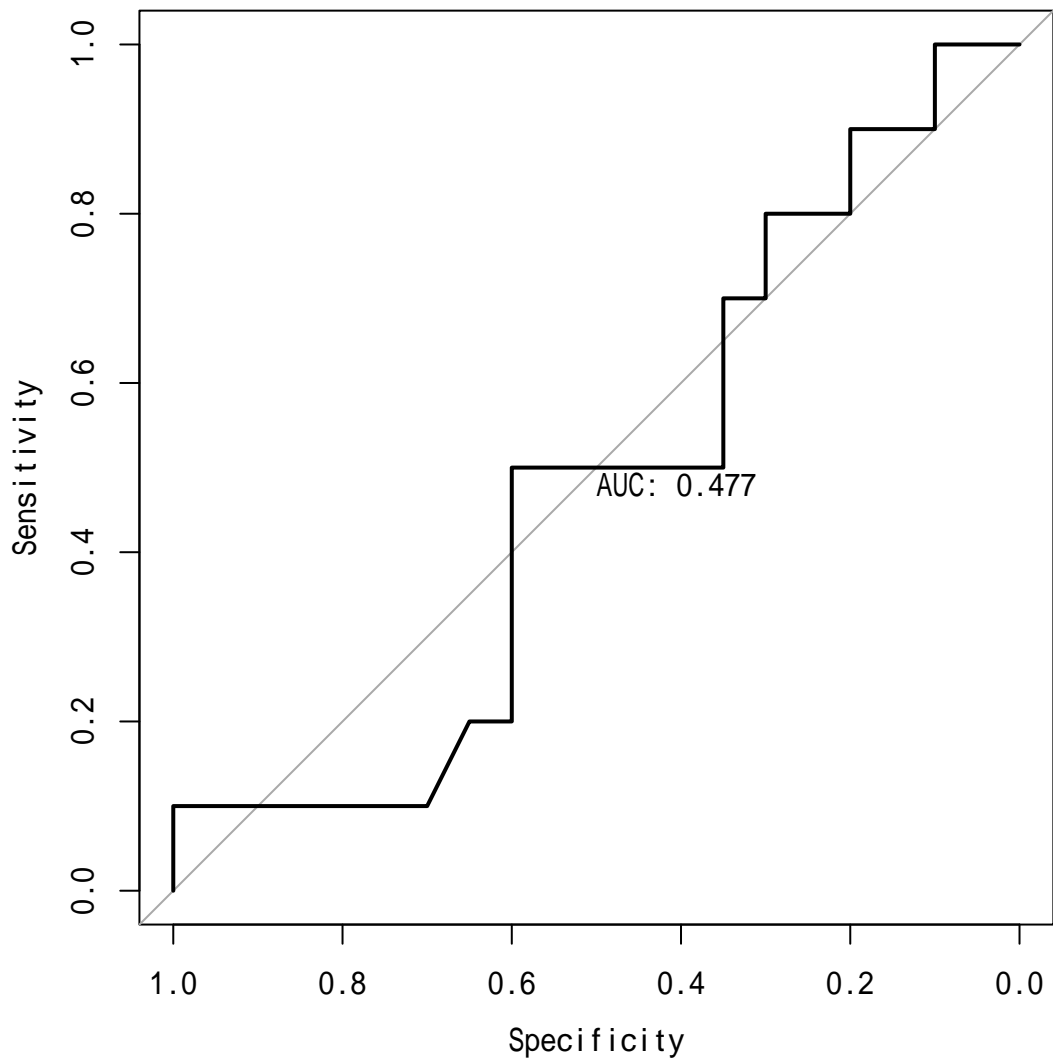

E3

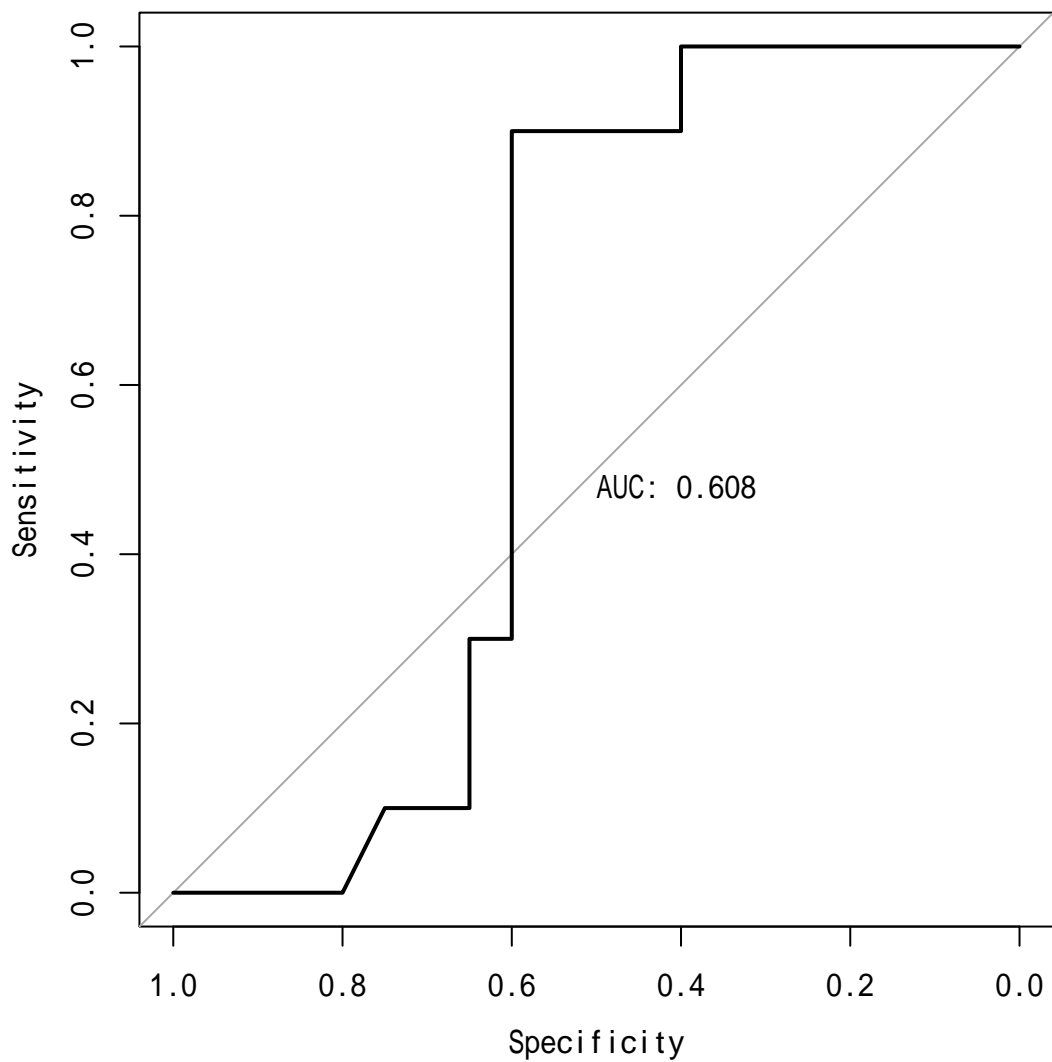

E12

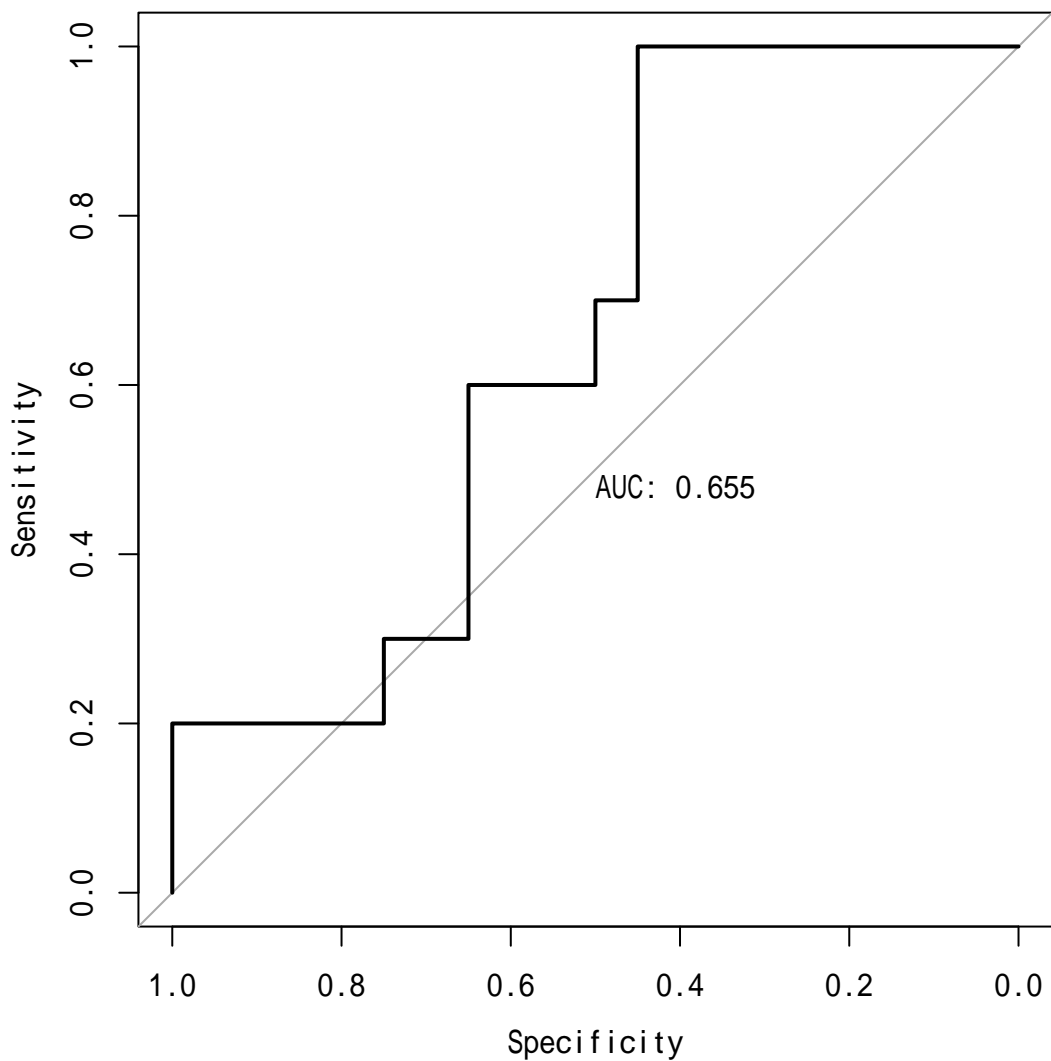

E11

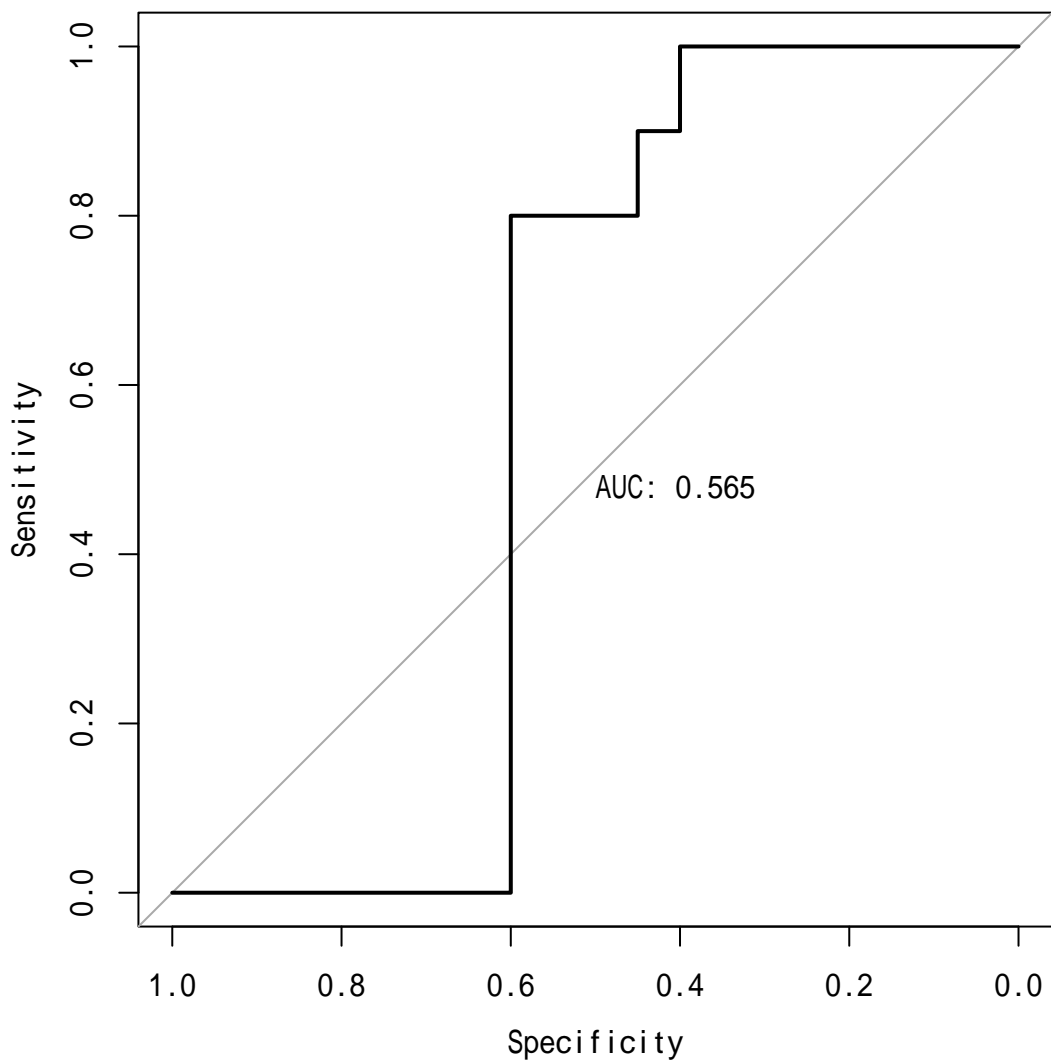



F2

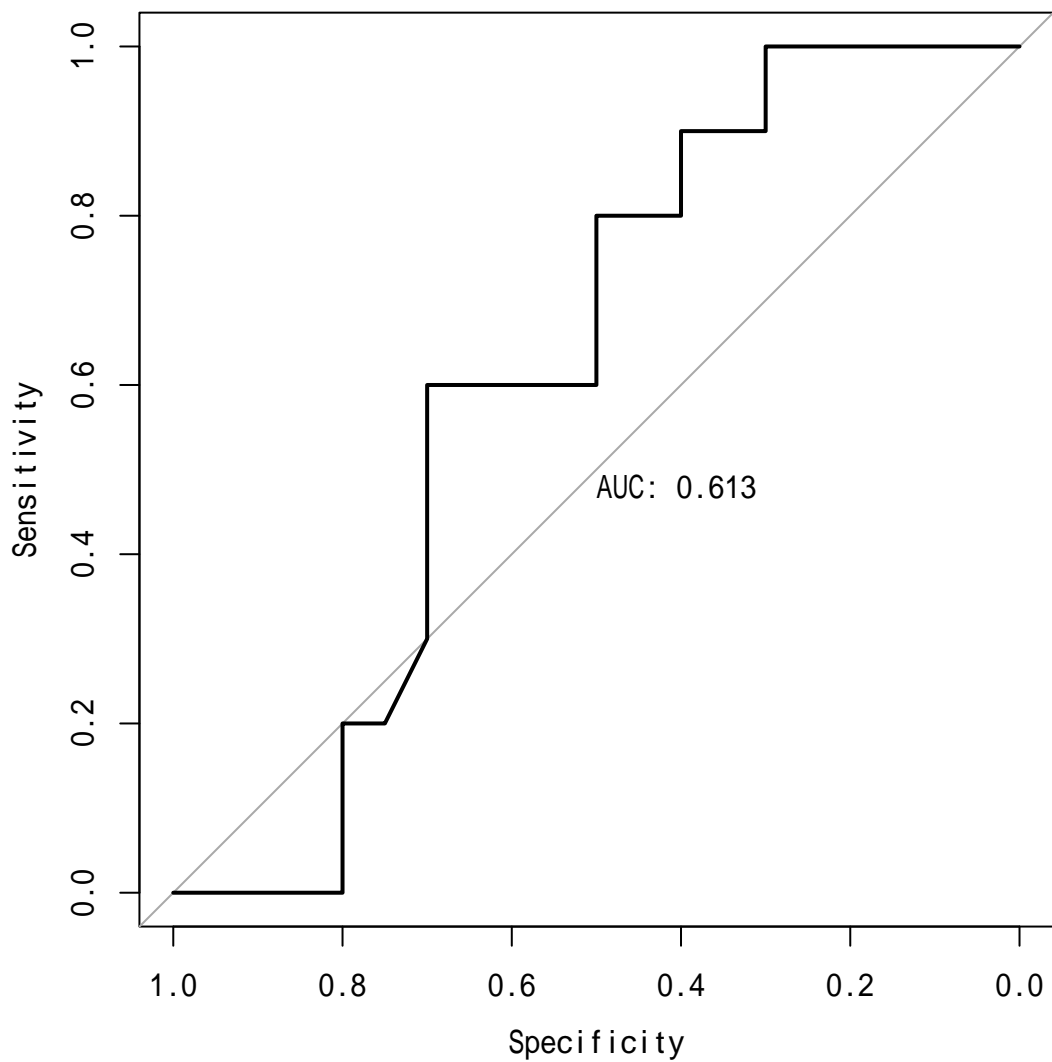

E6

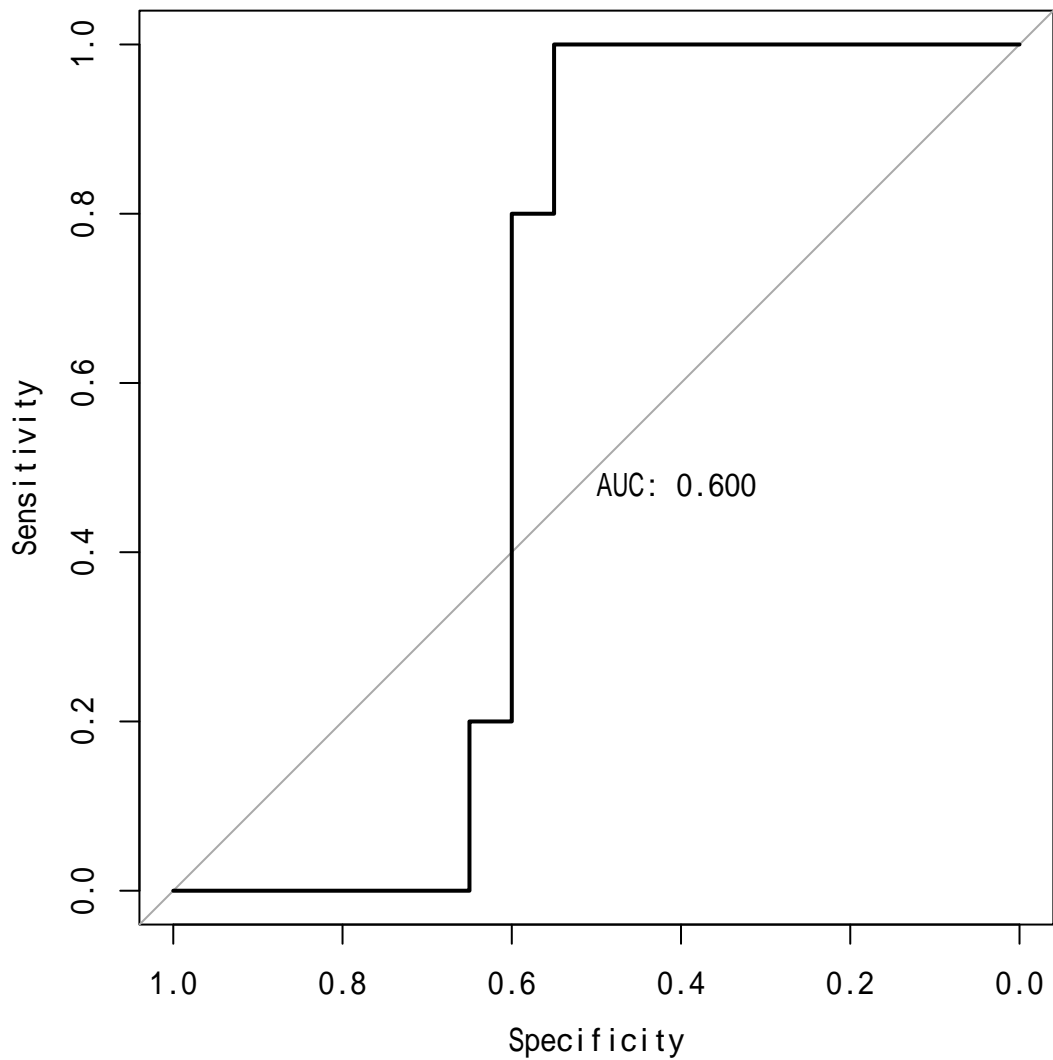

JJ2

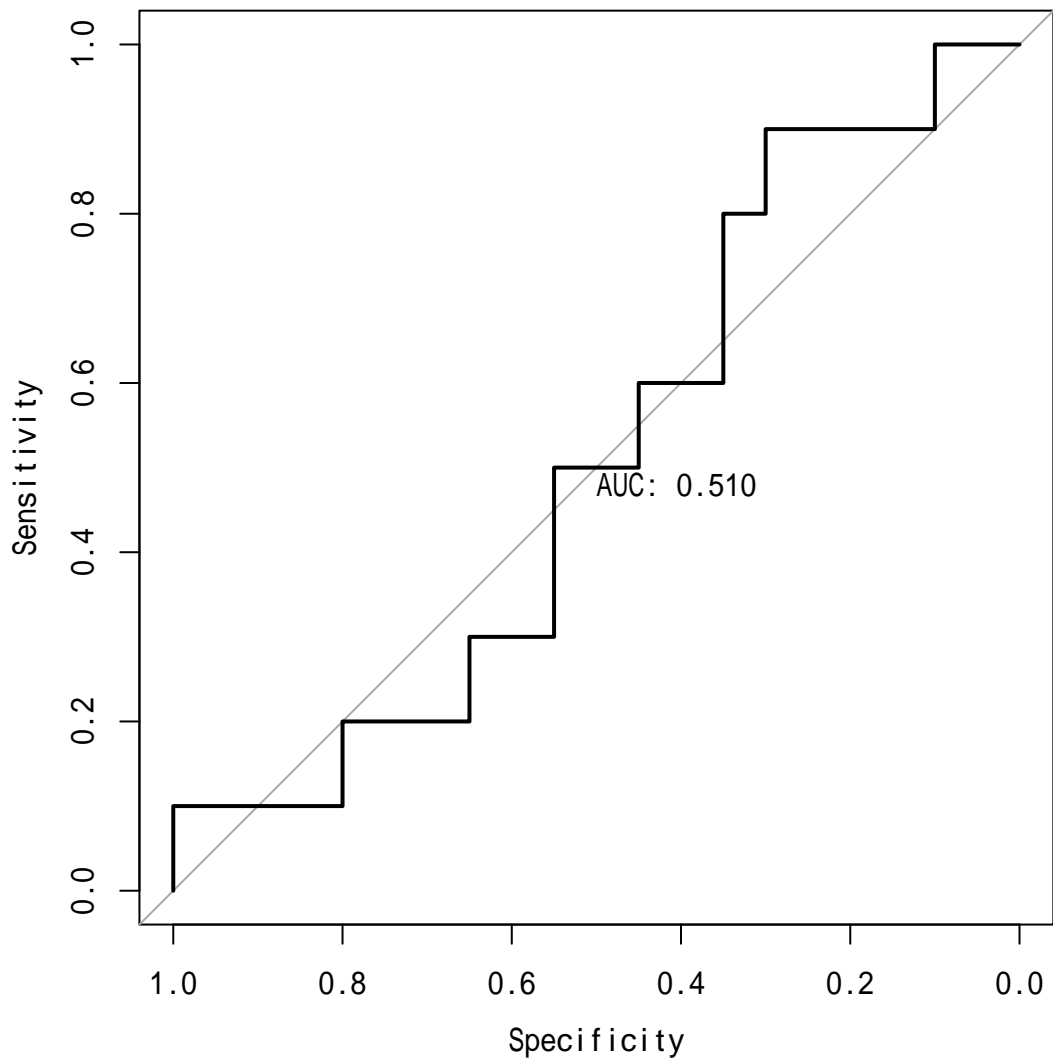

N21

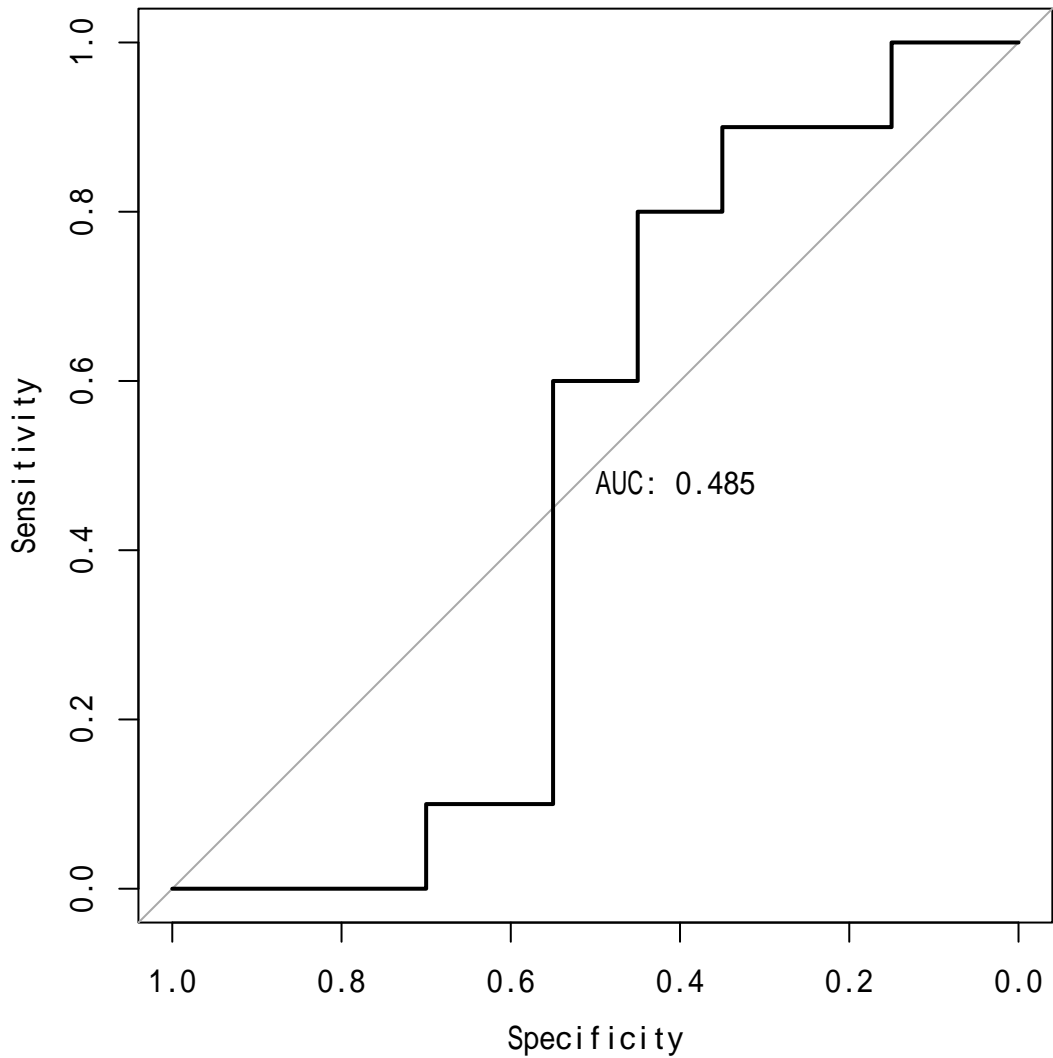

N20

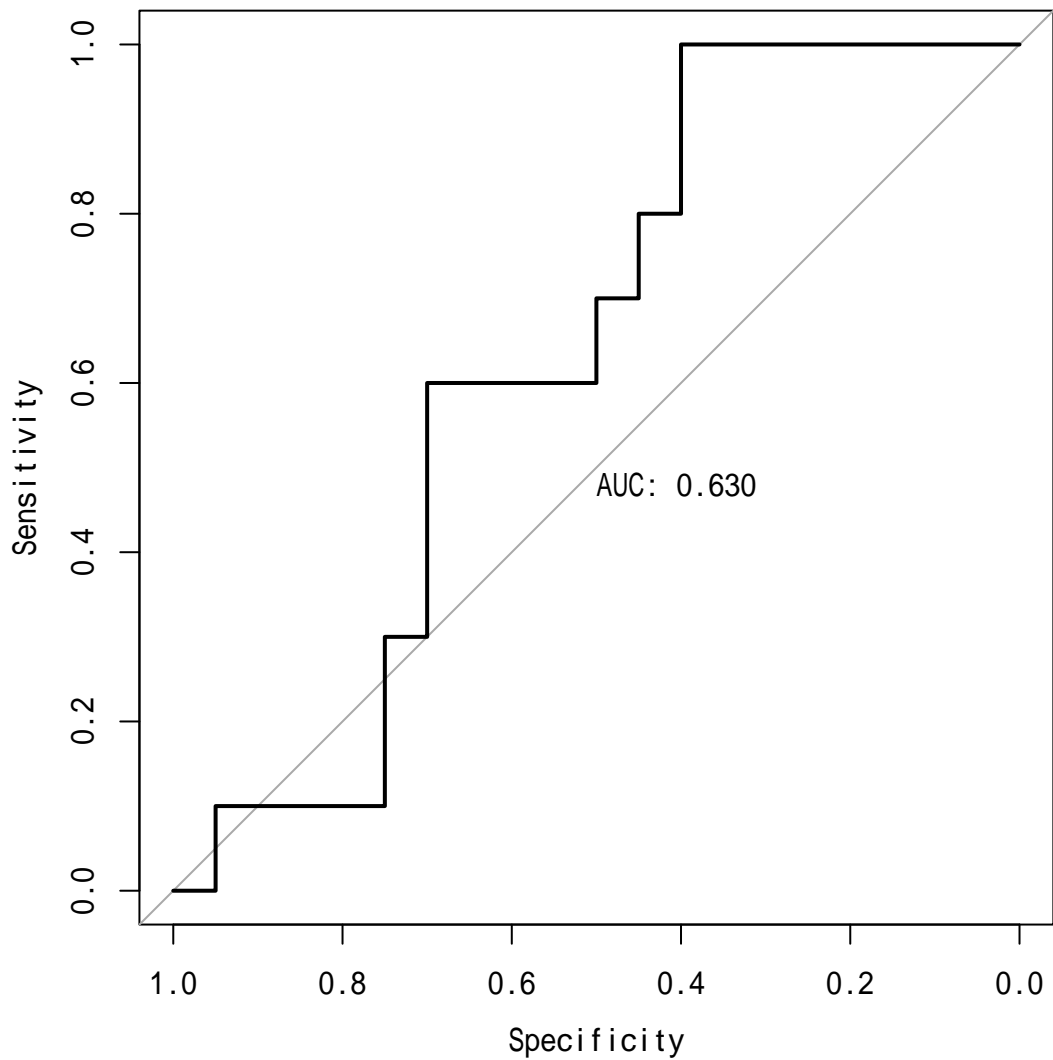

F4

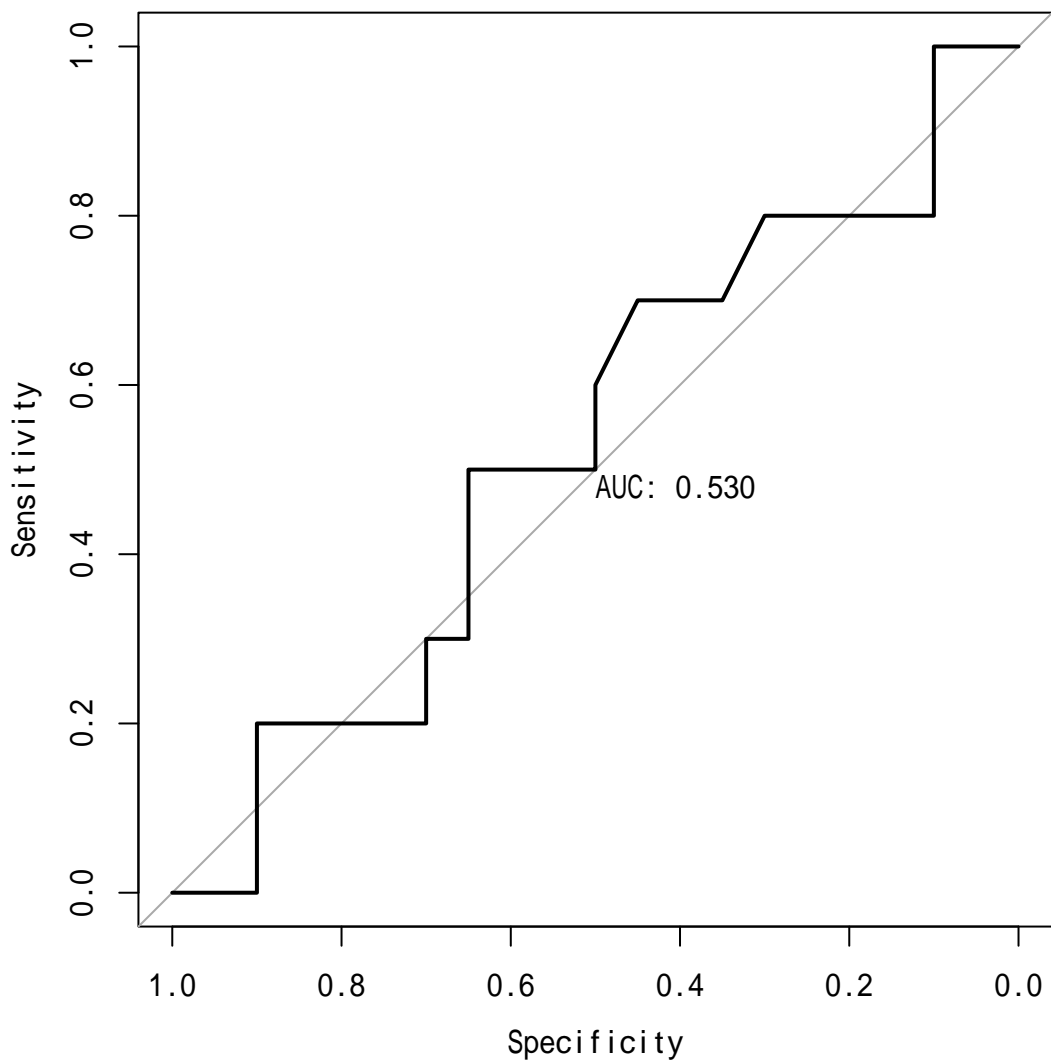

G1

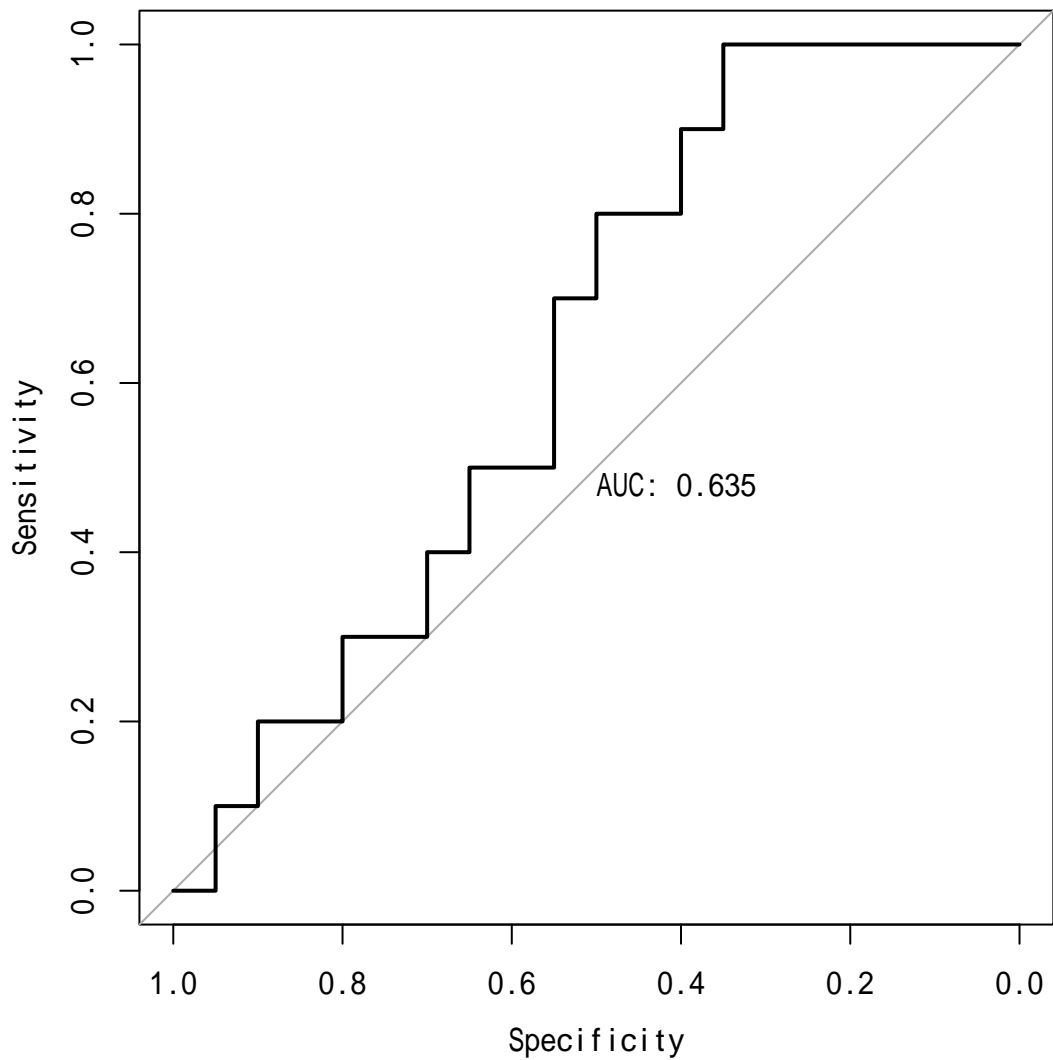

N25

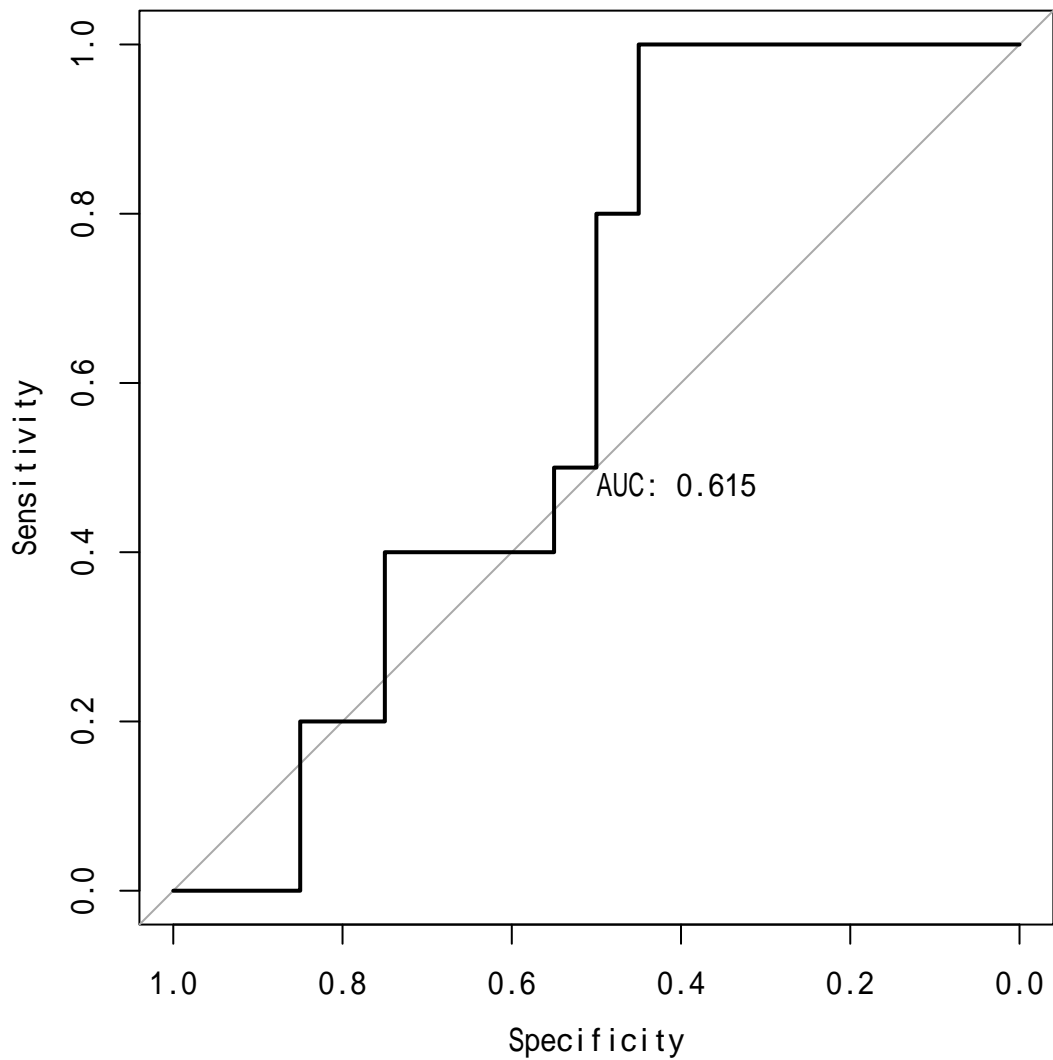



G8

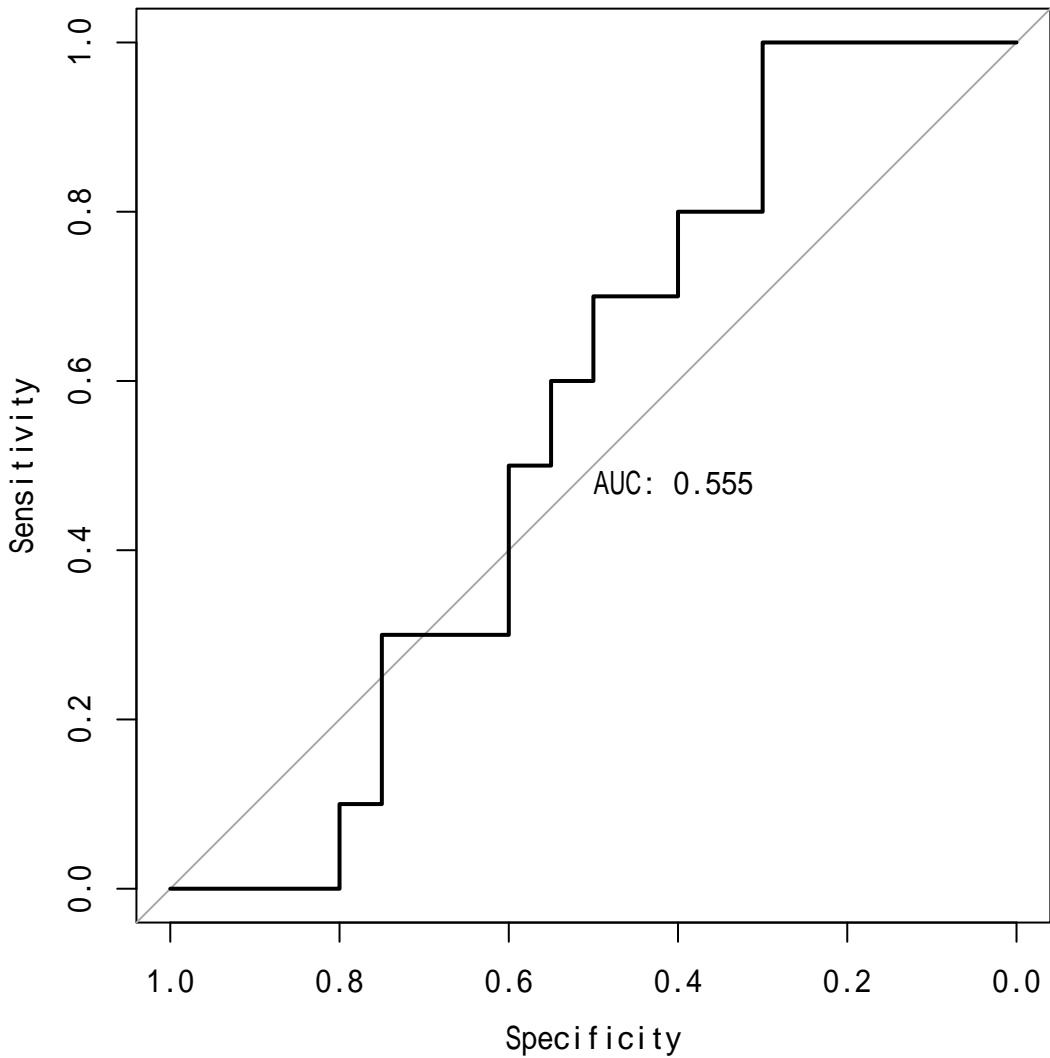

G7

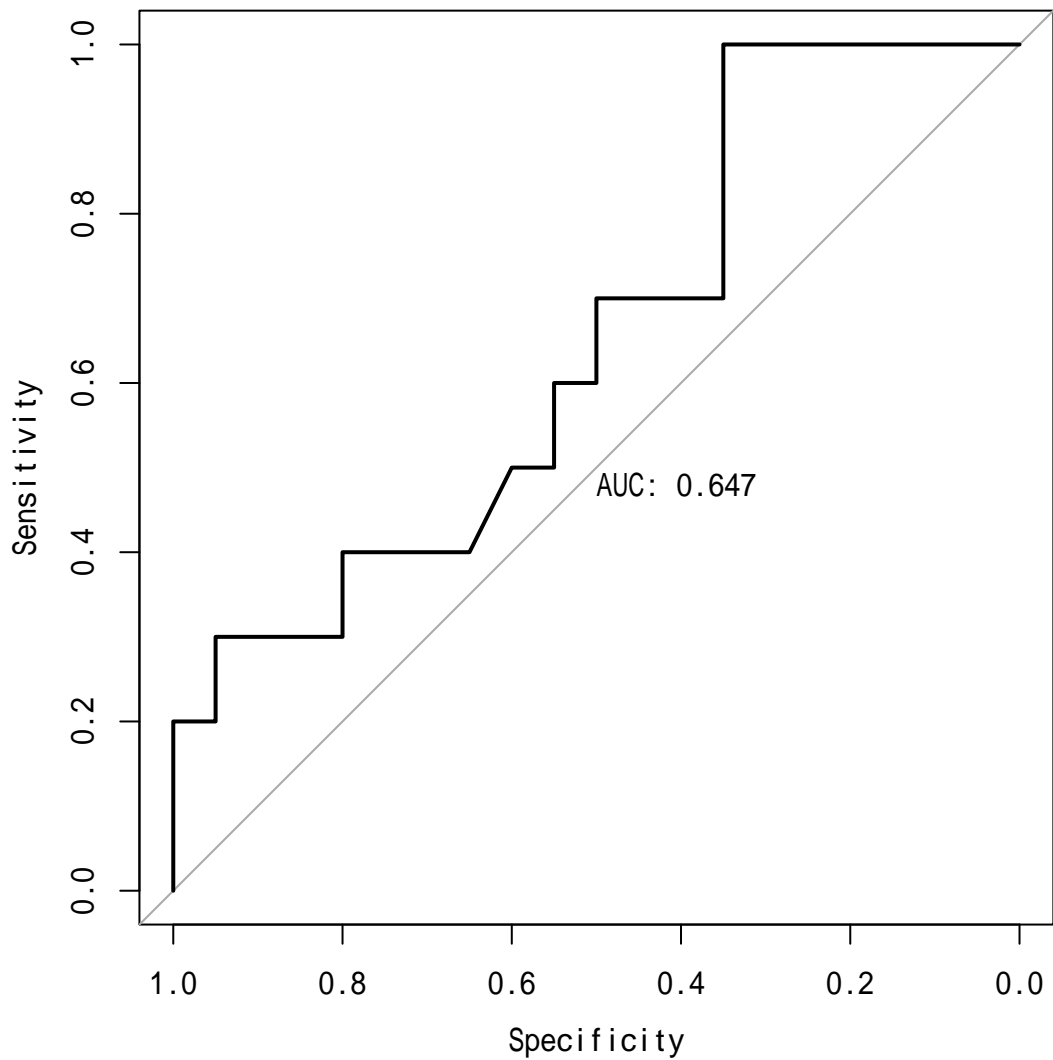

G6

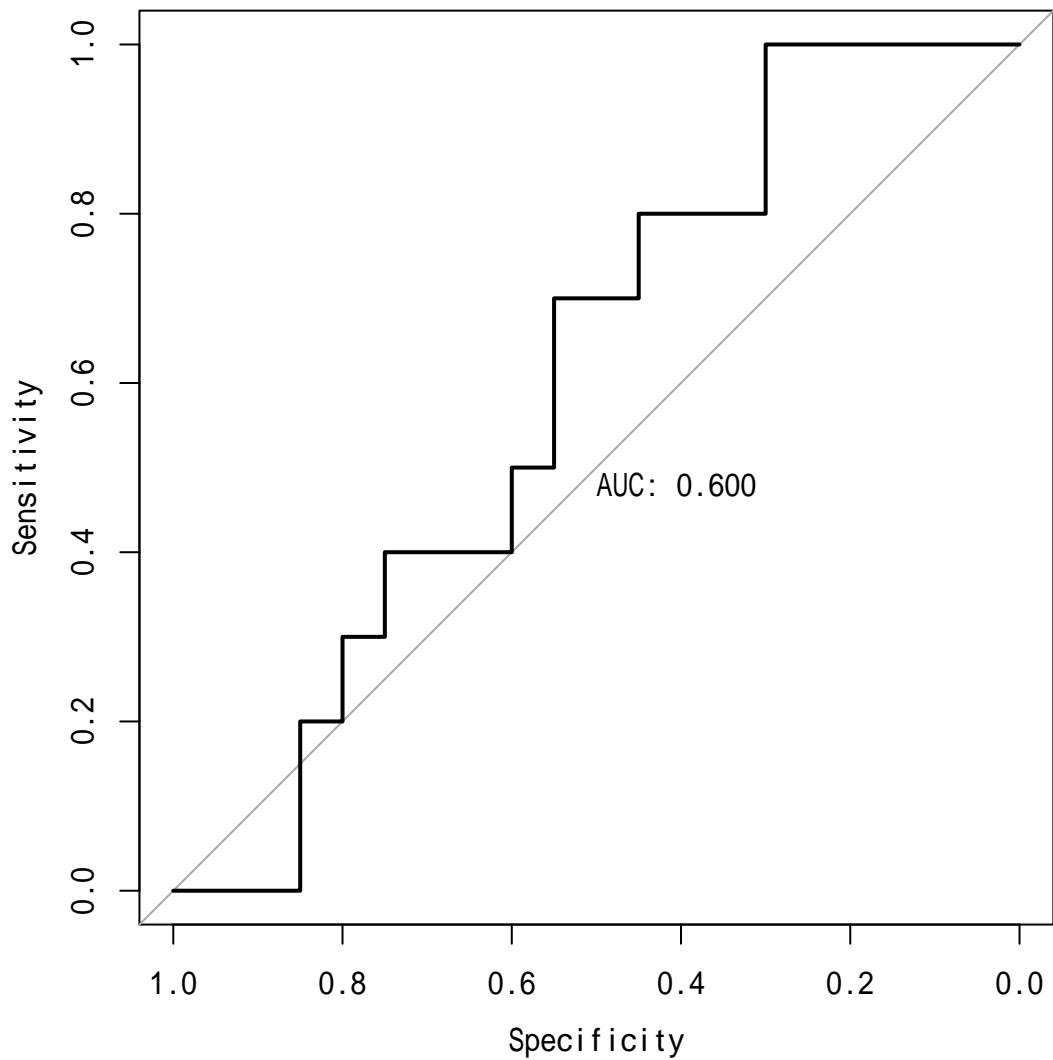

G5

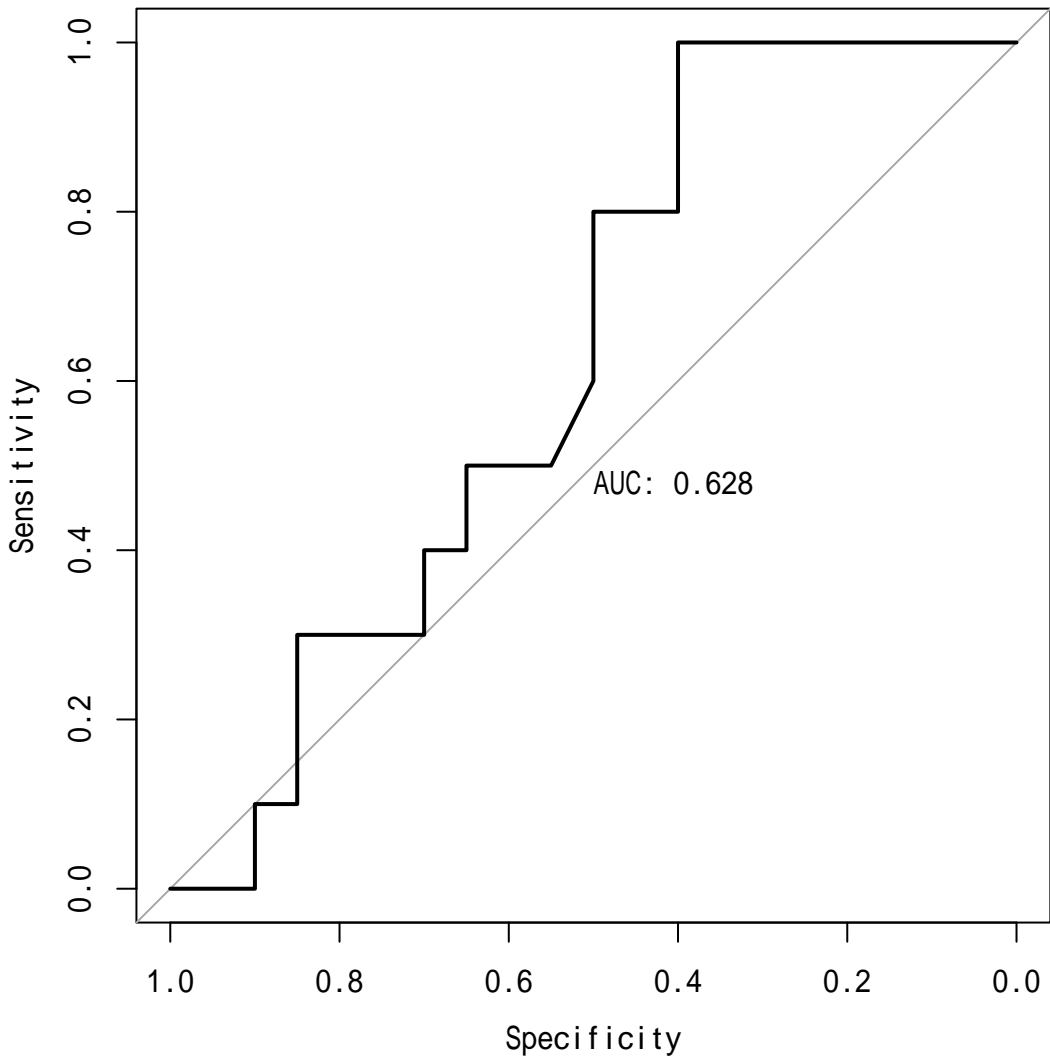

G10

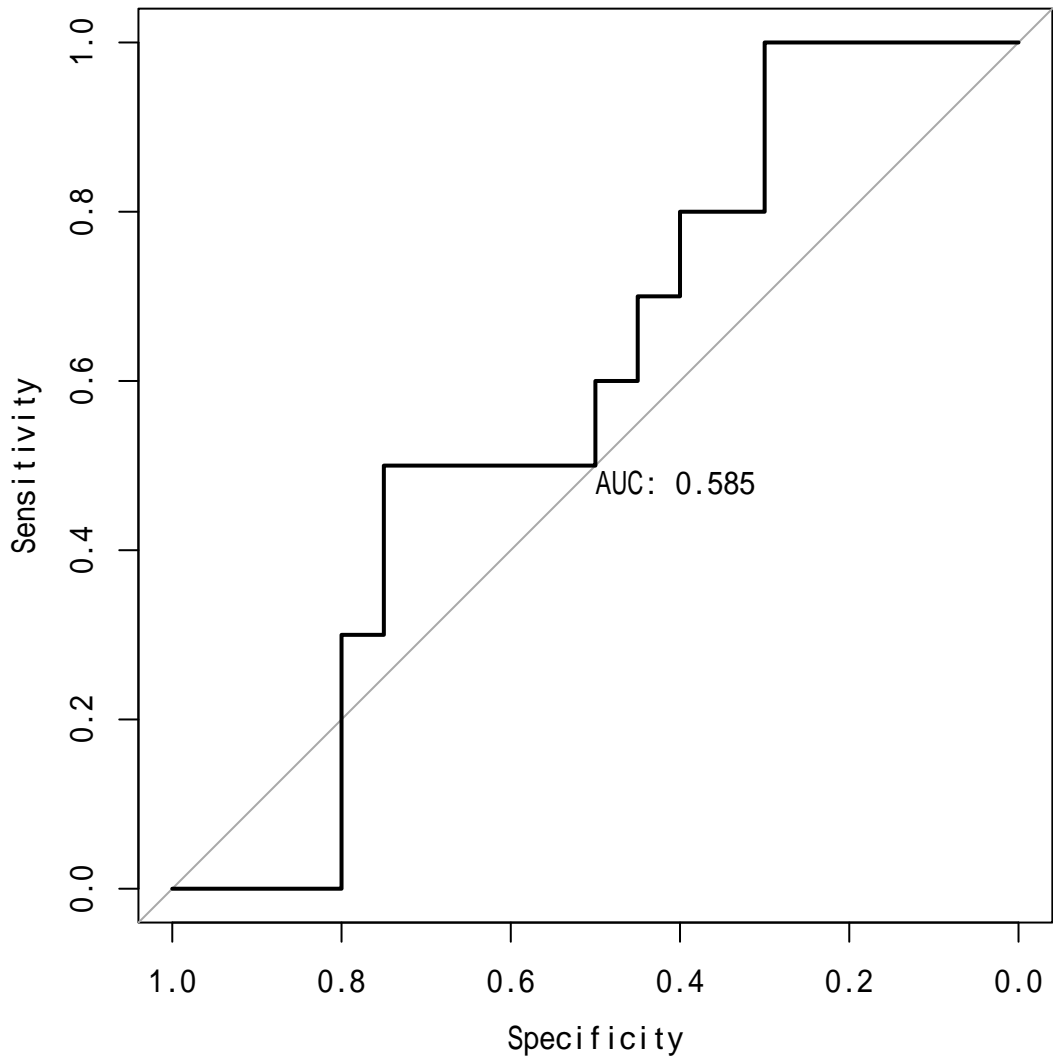

G9

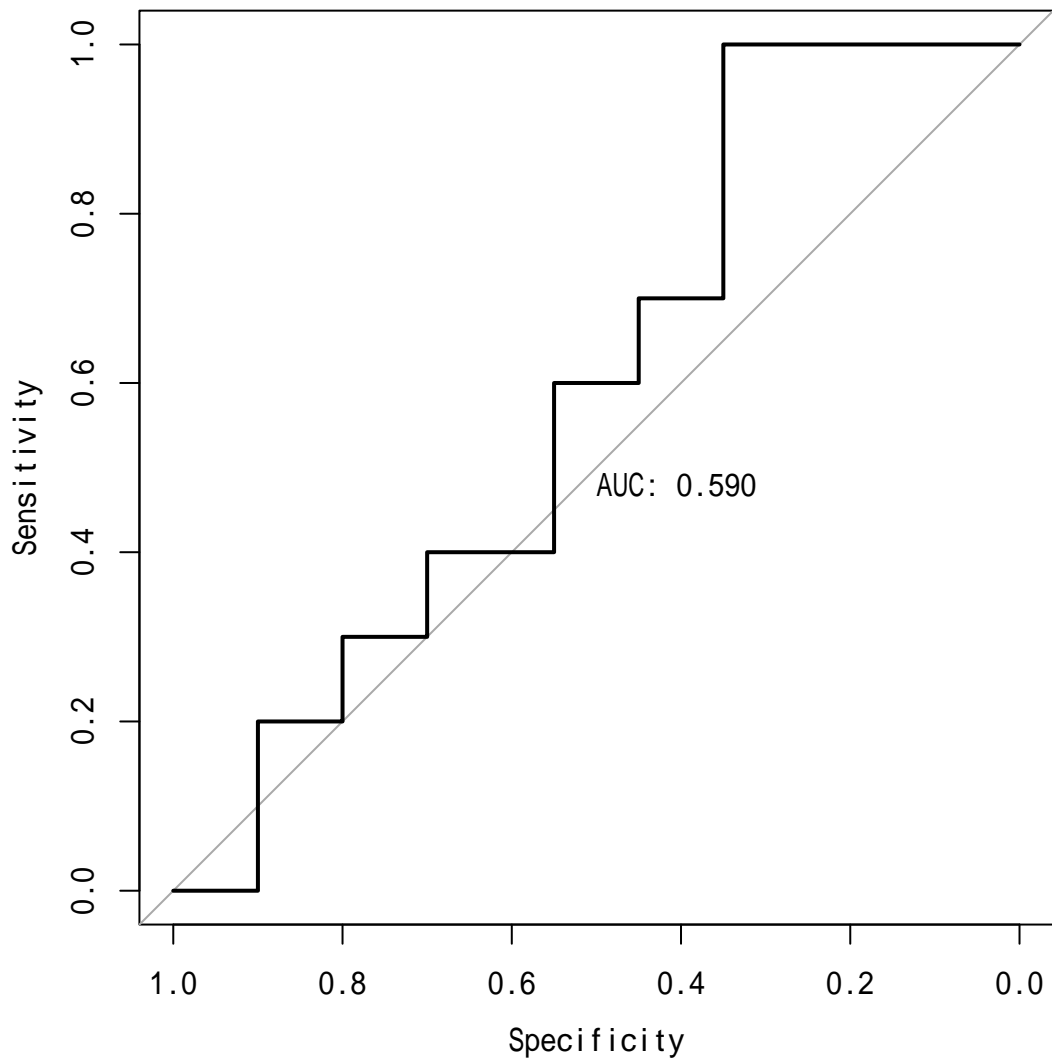

L9

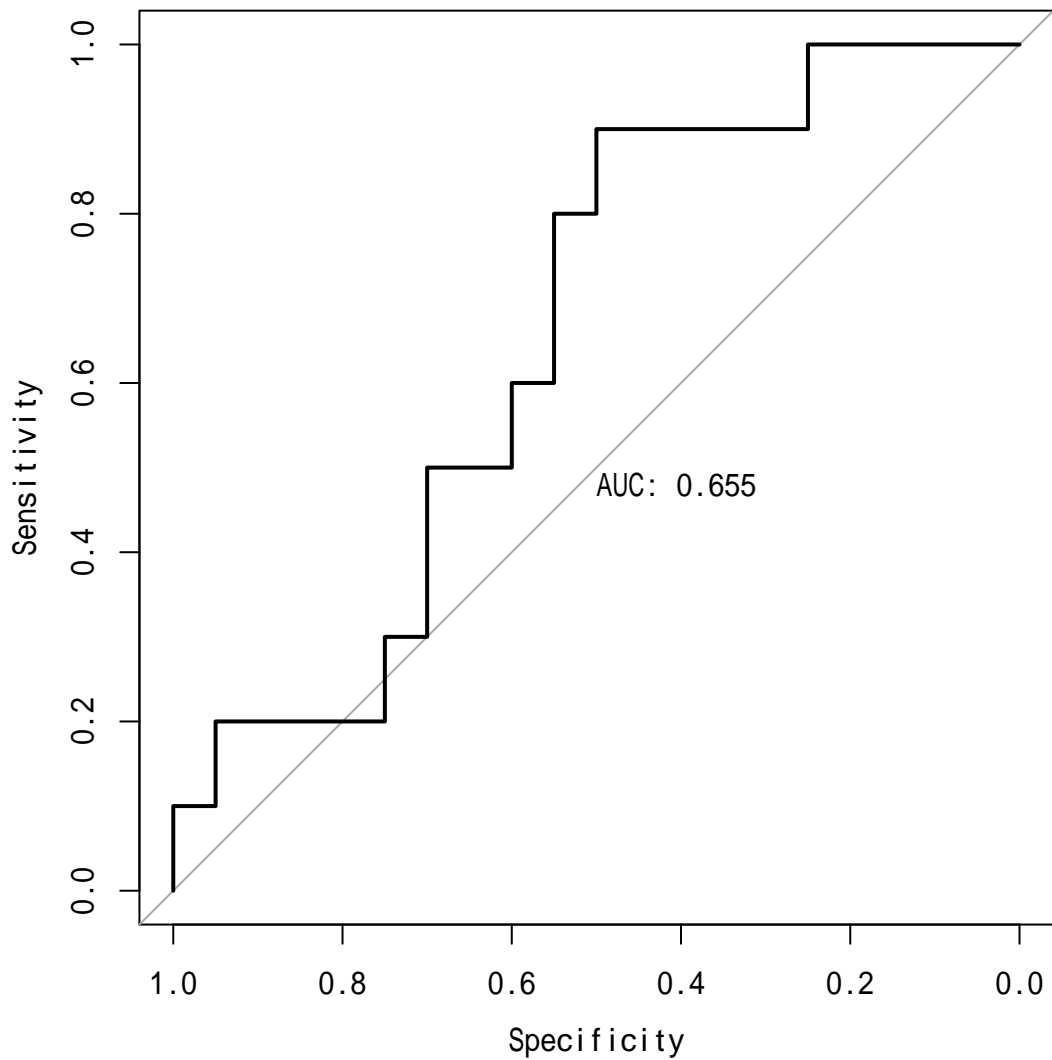

N24

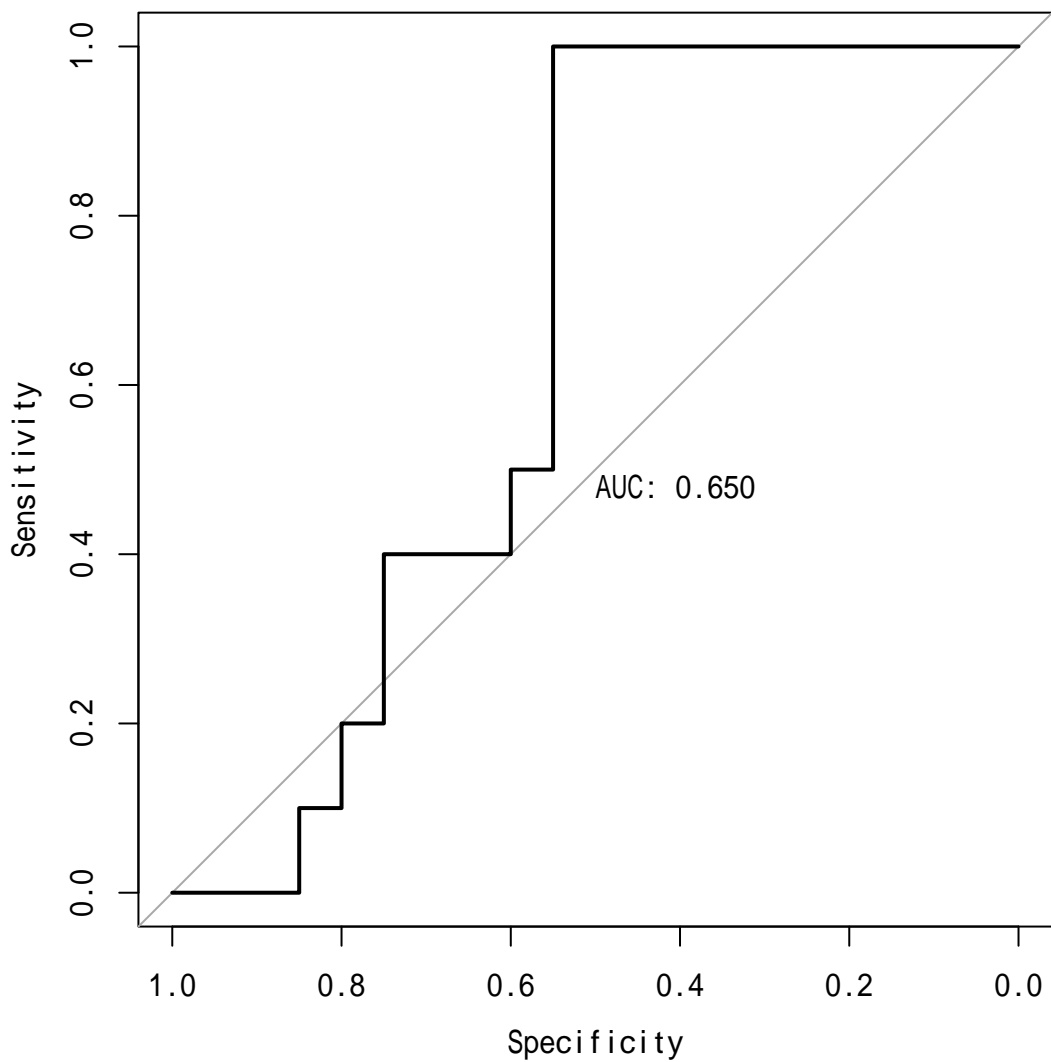



G3

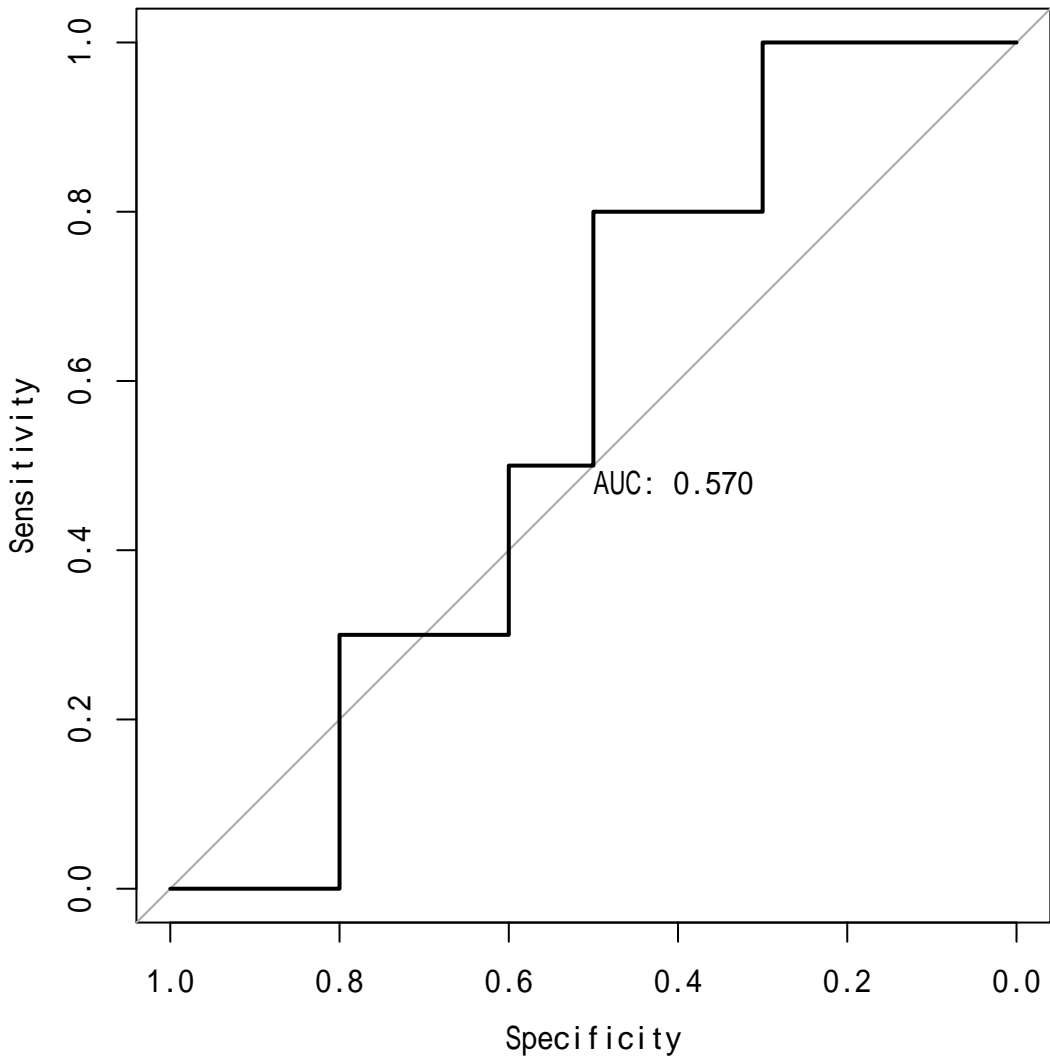

N23

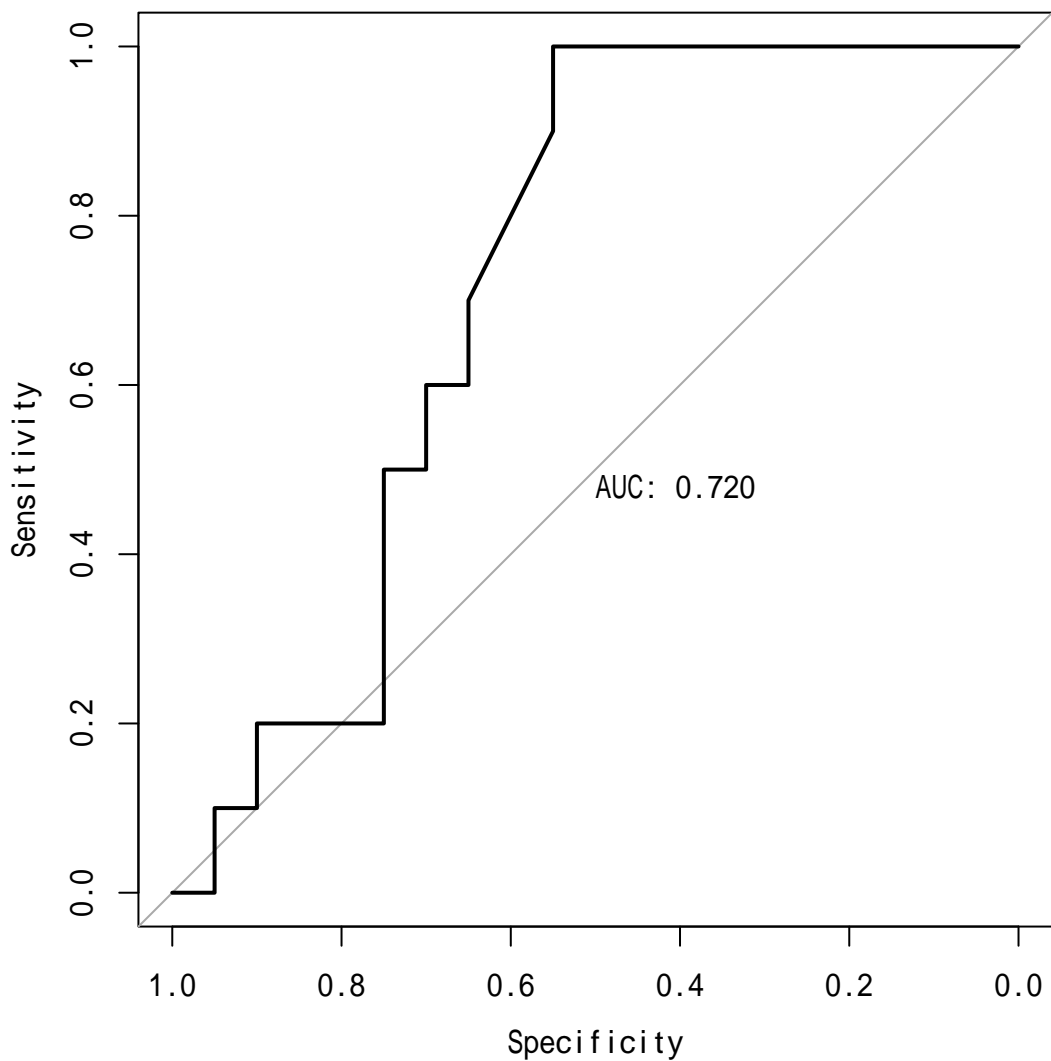

N22

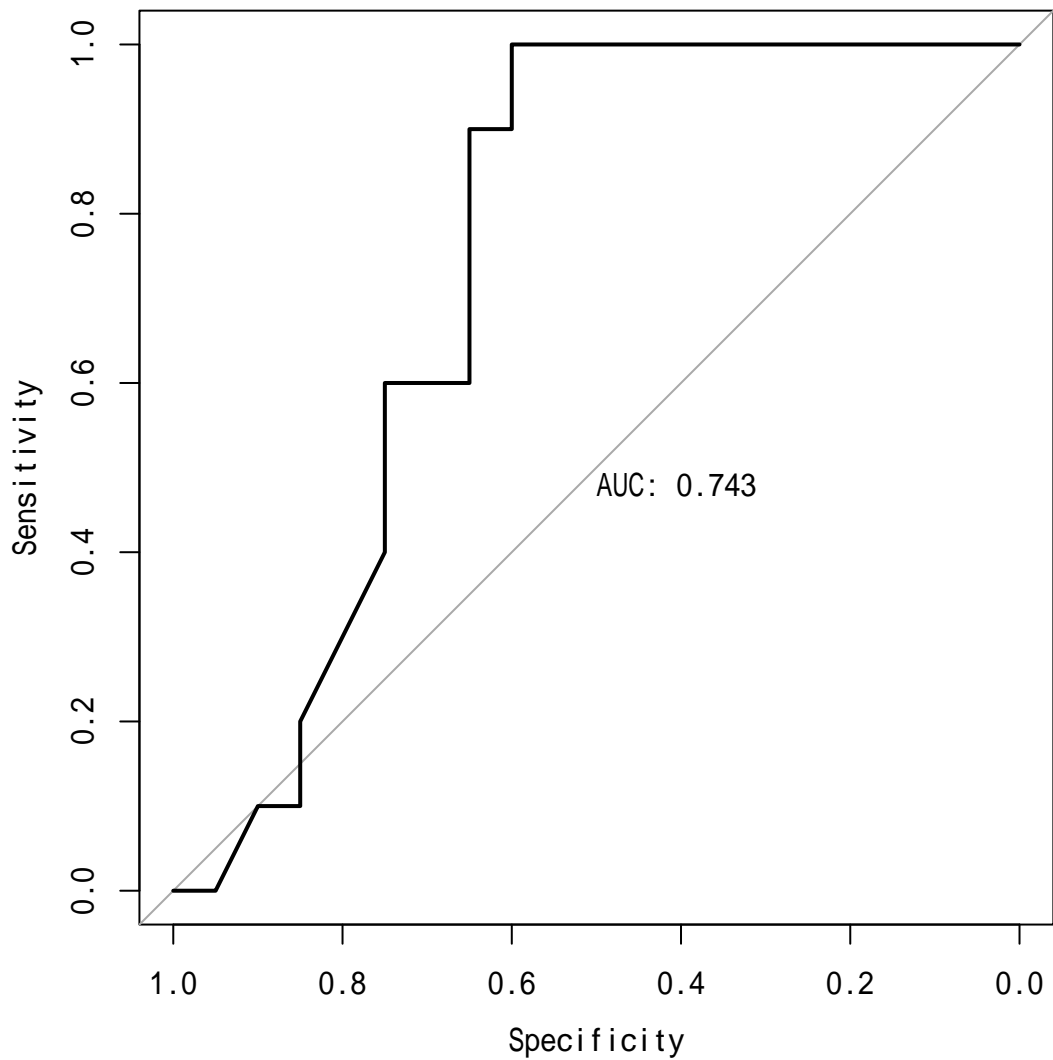

G2

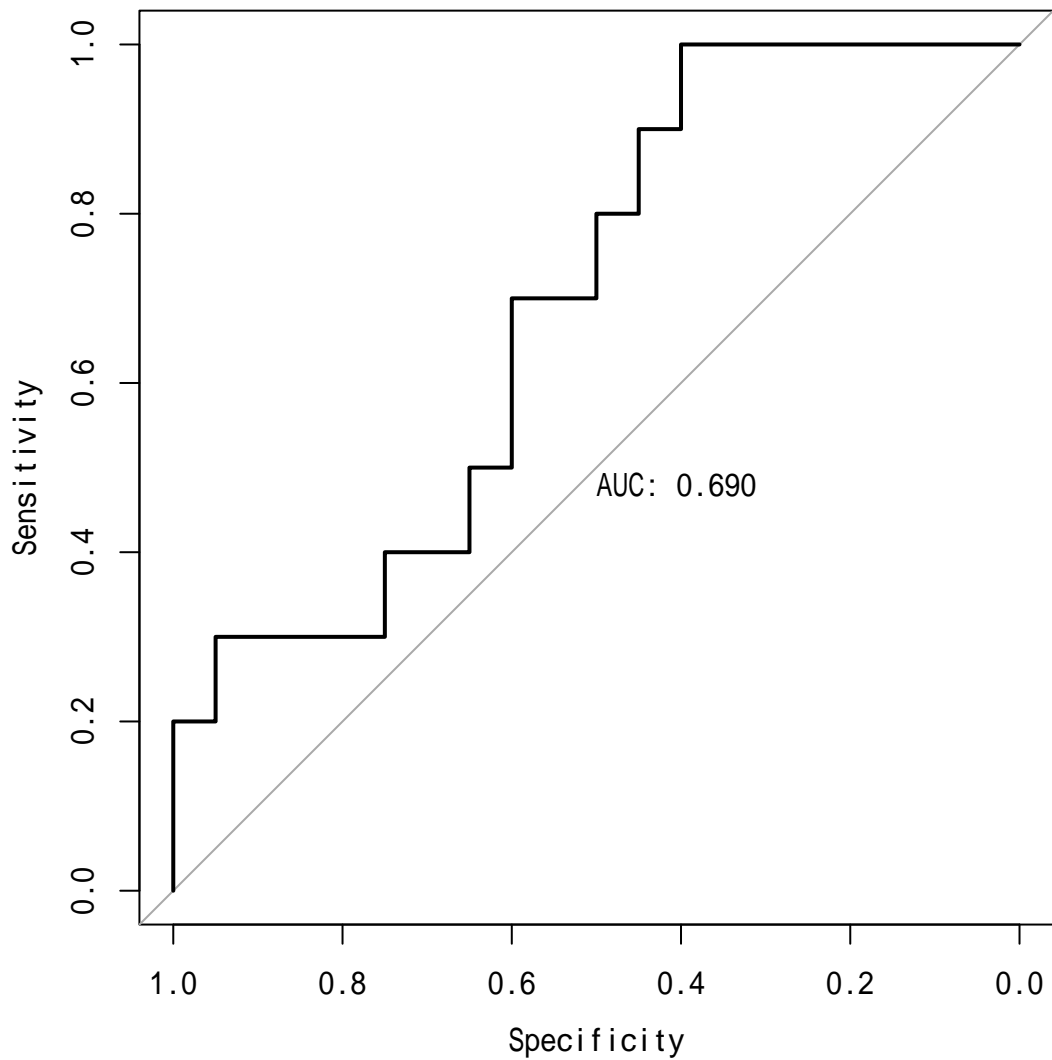

G4

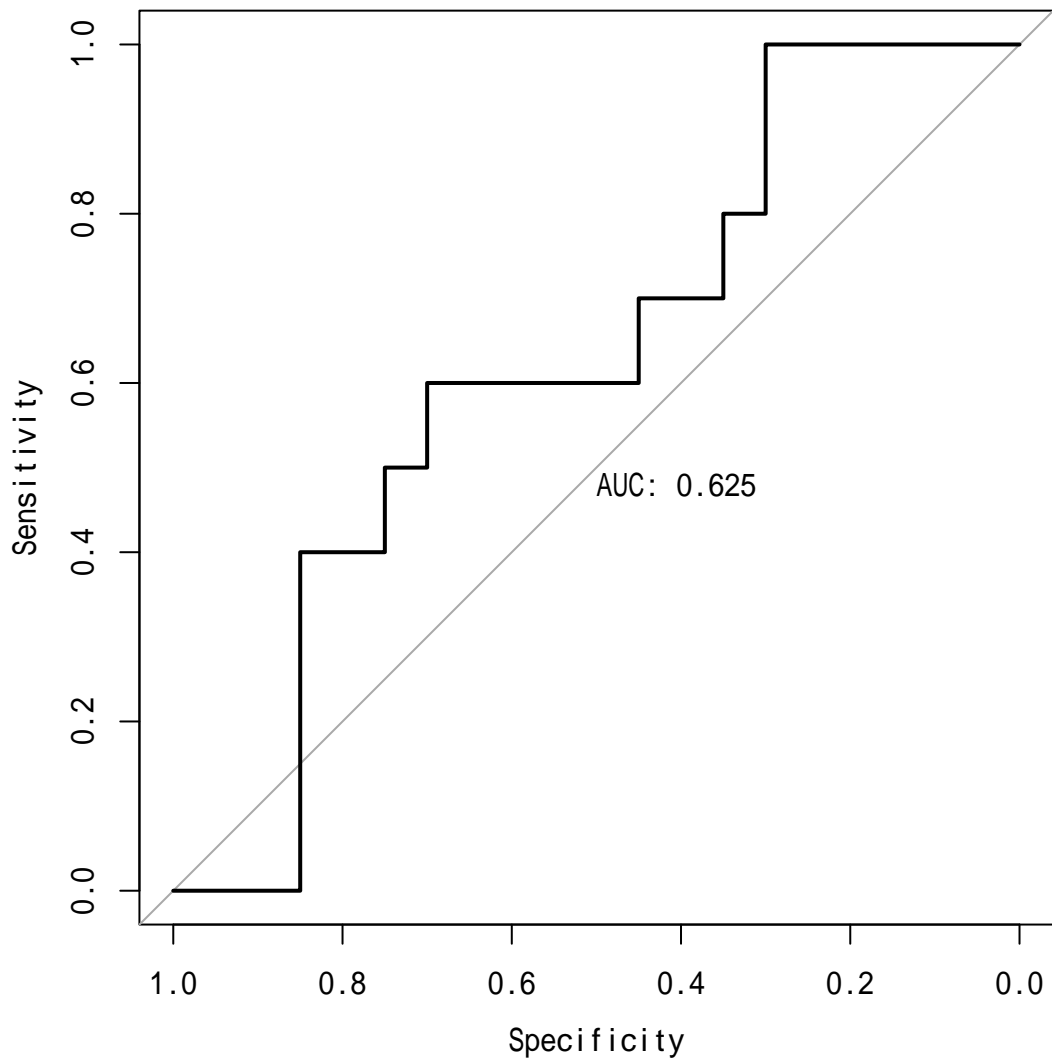

C1

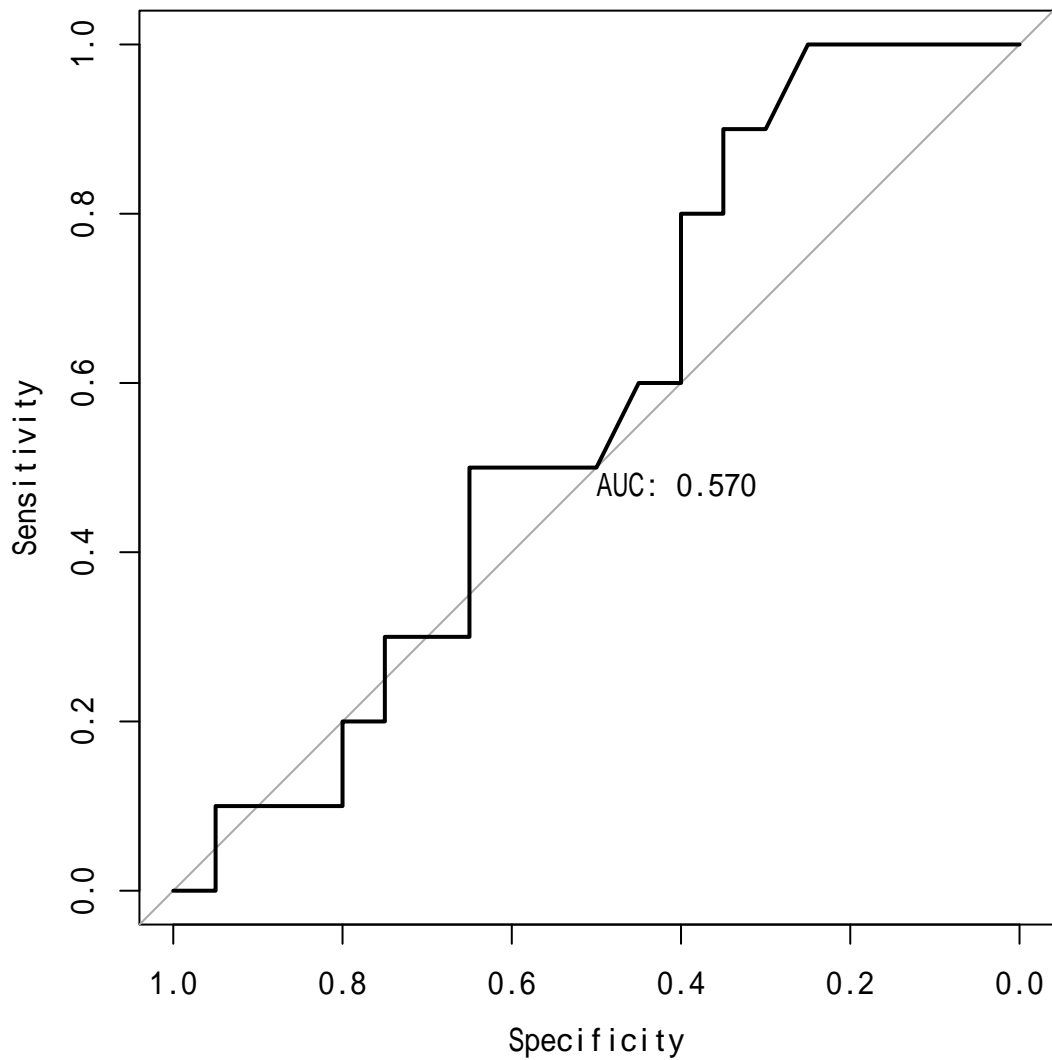

C2

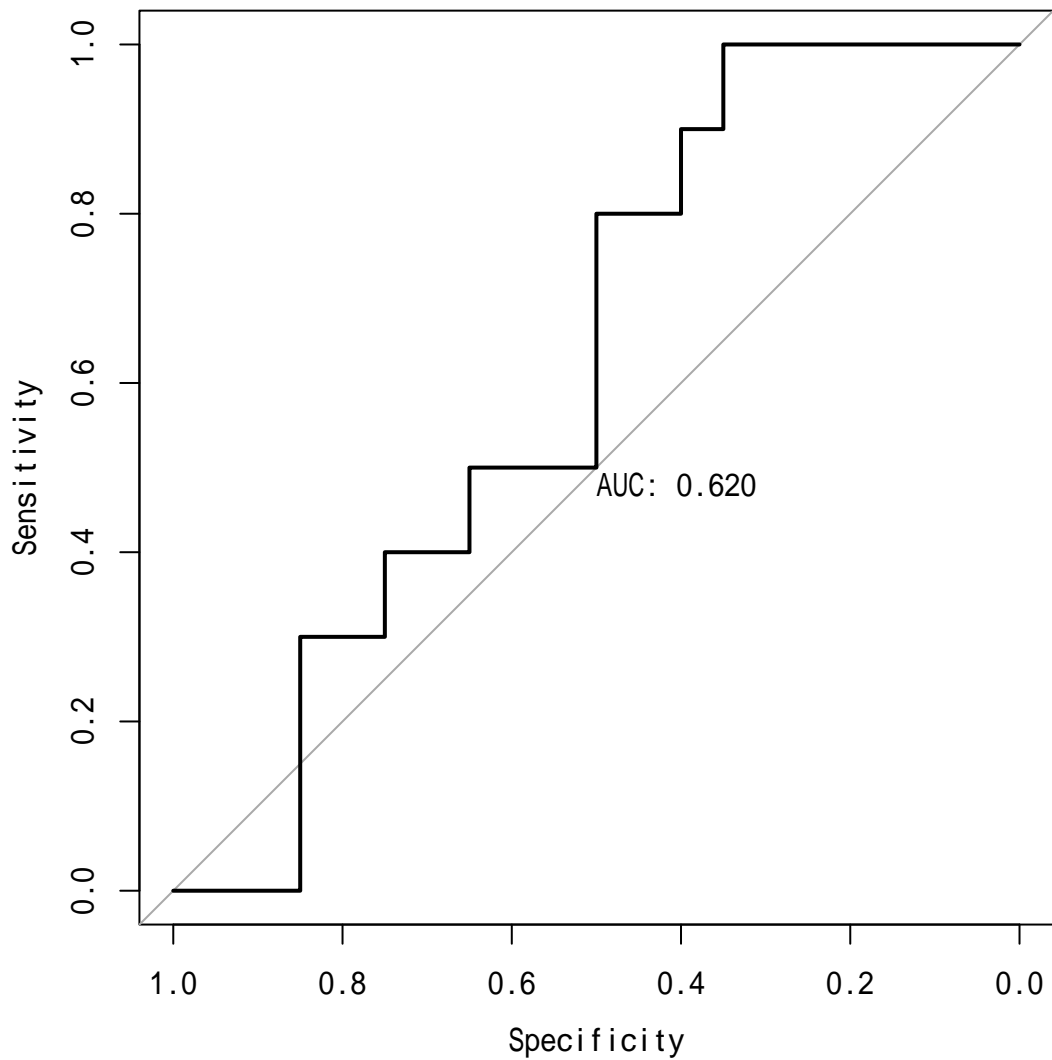

N13

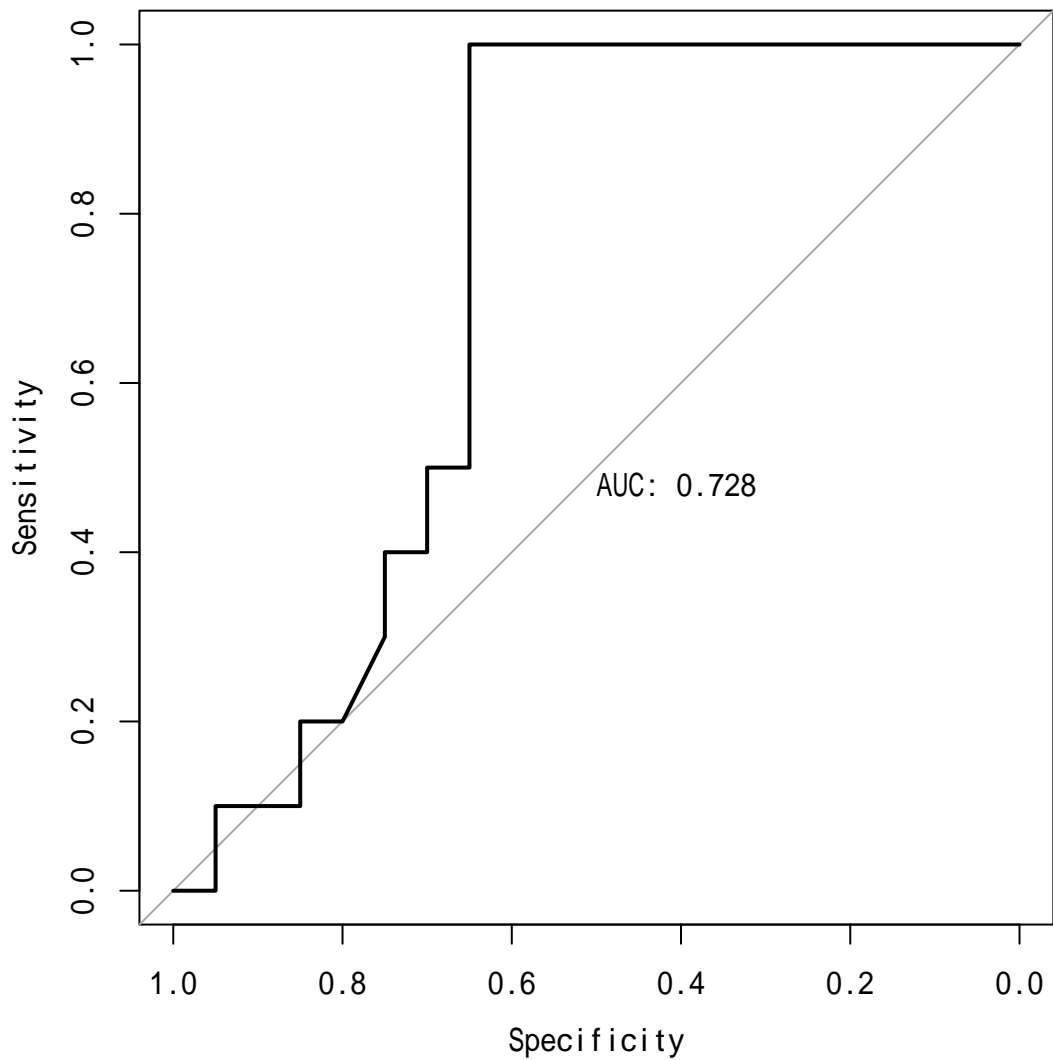



N17

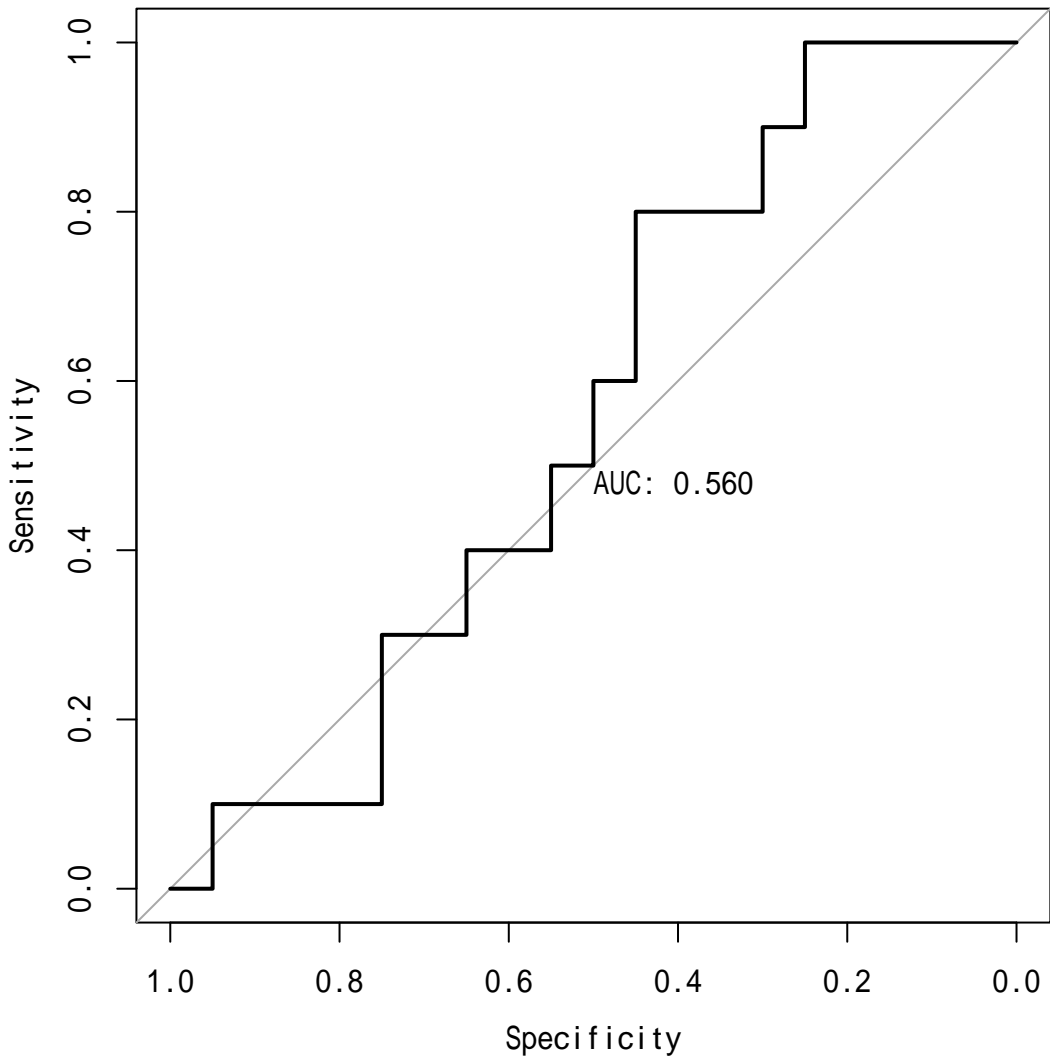

C3

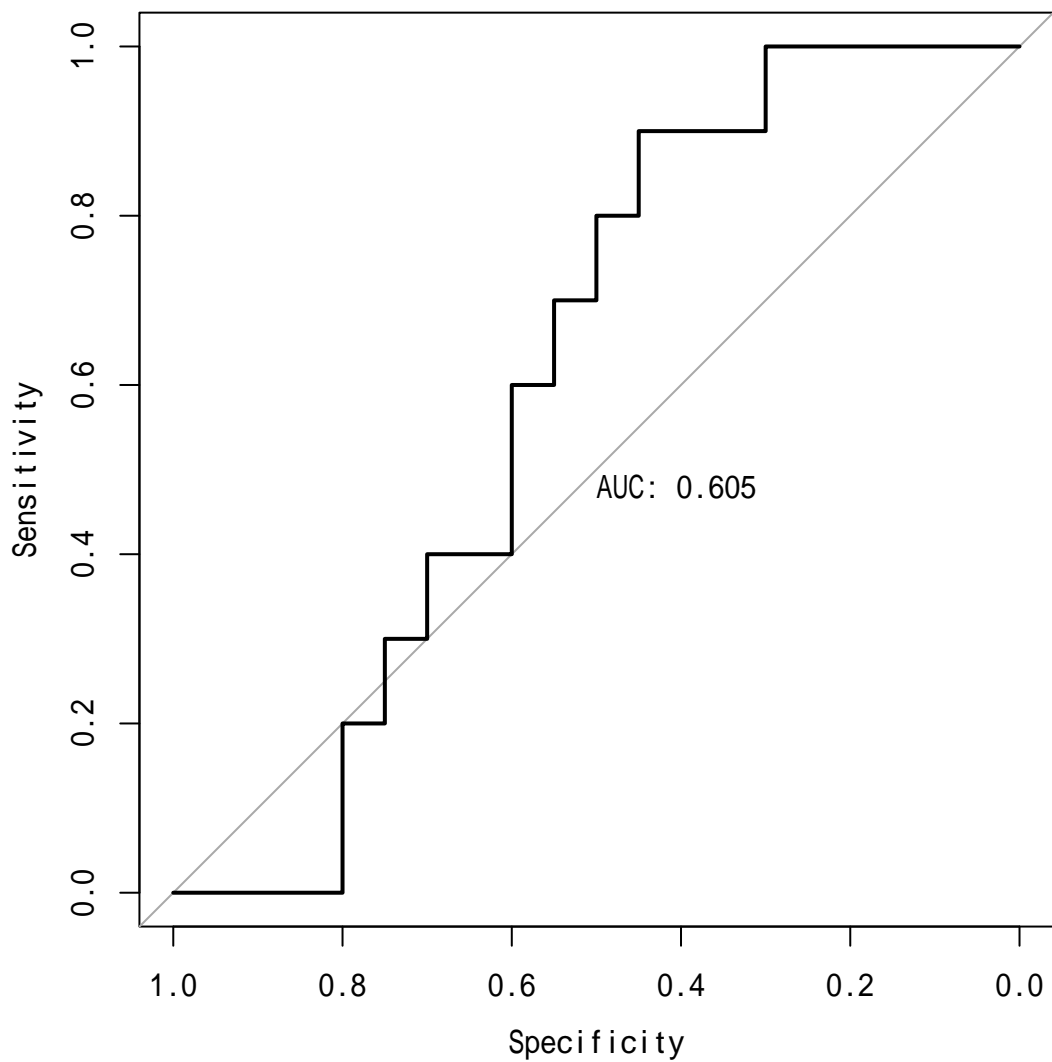

C4

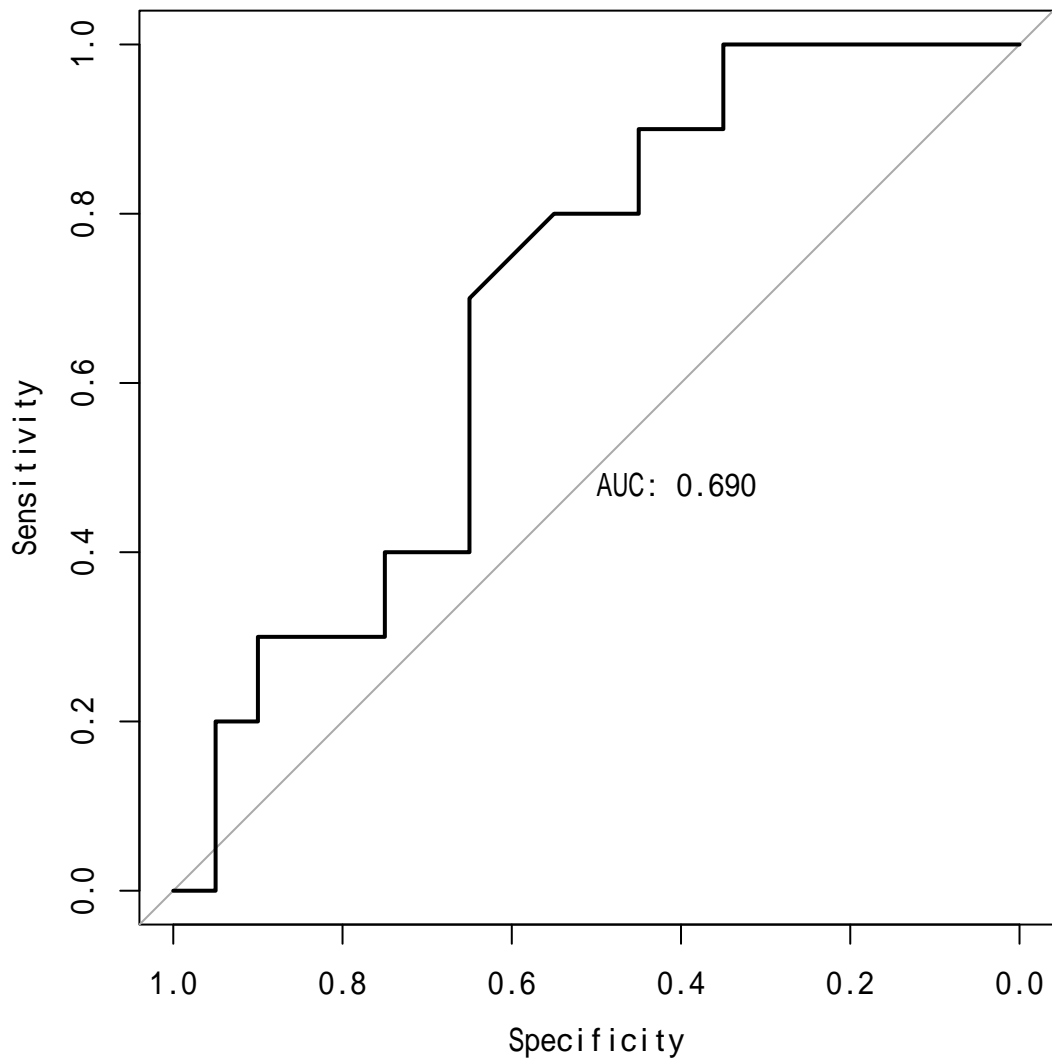

N10

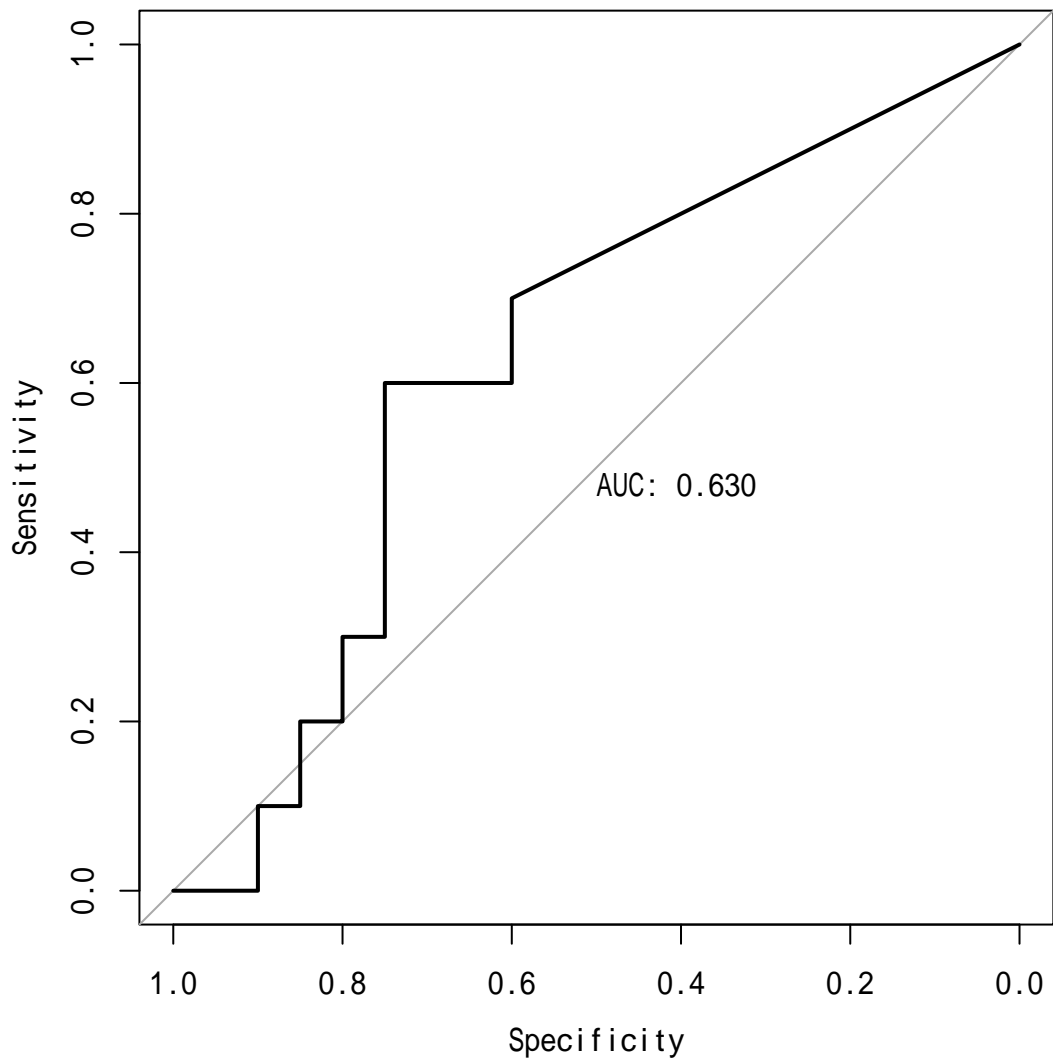

N16

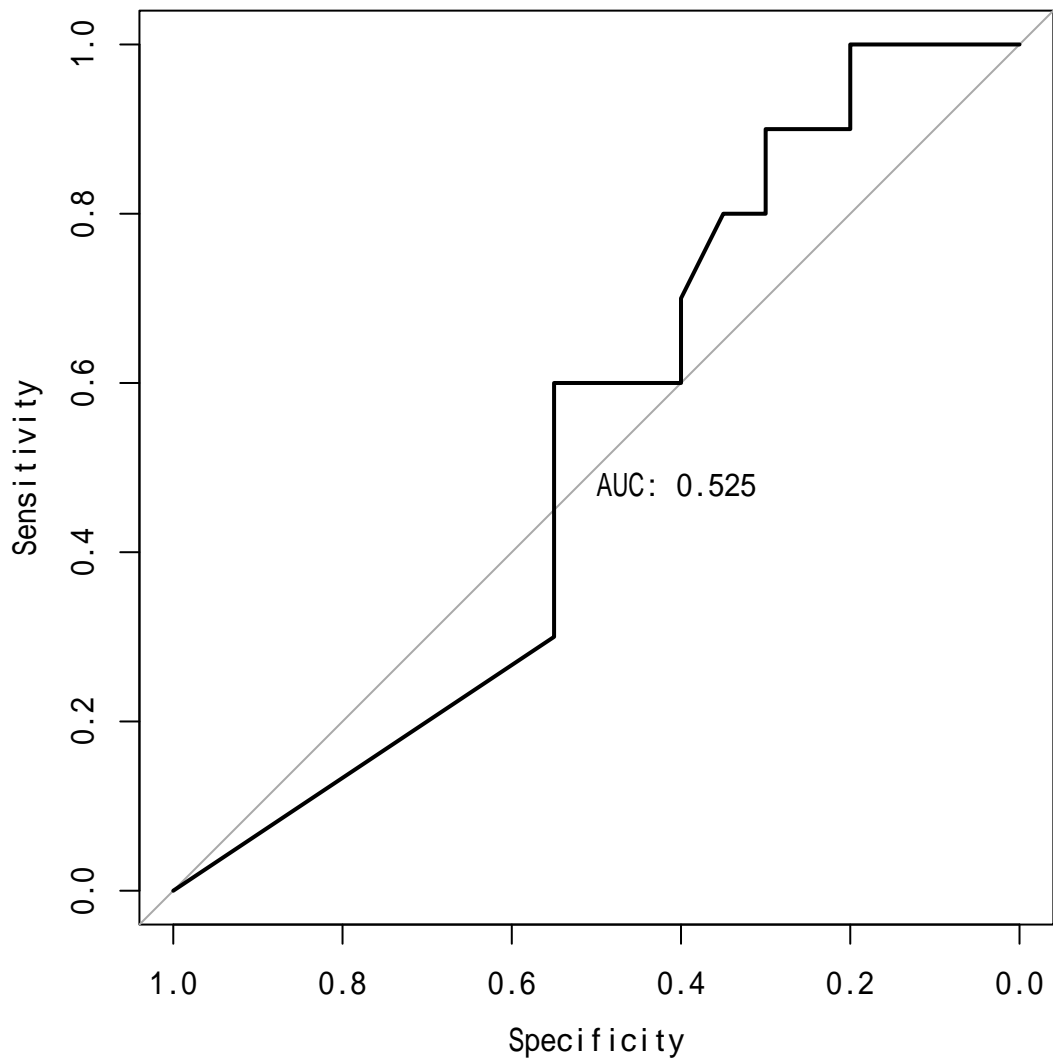

L1

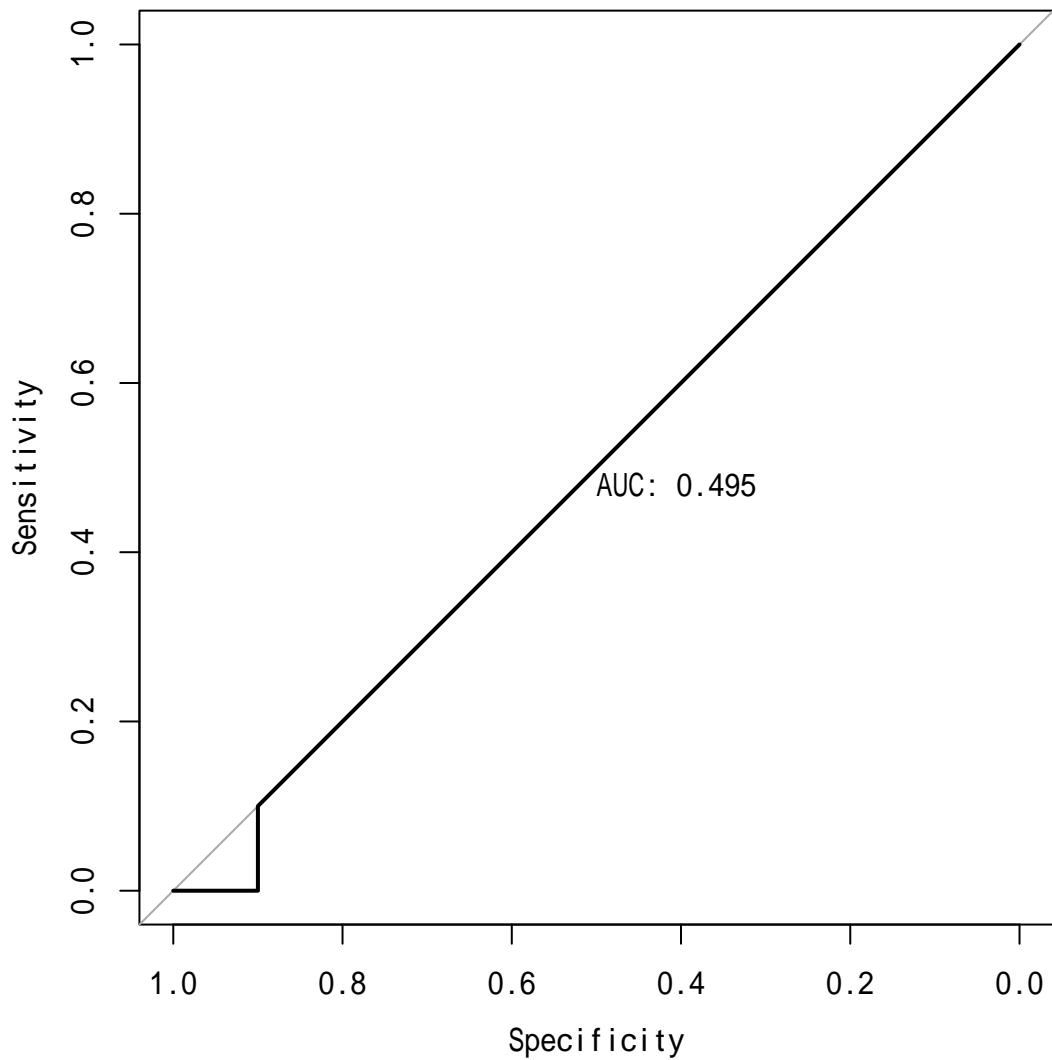

N18

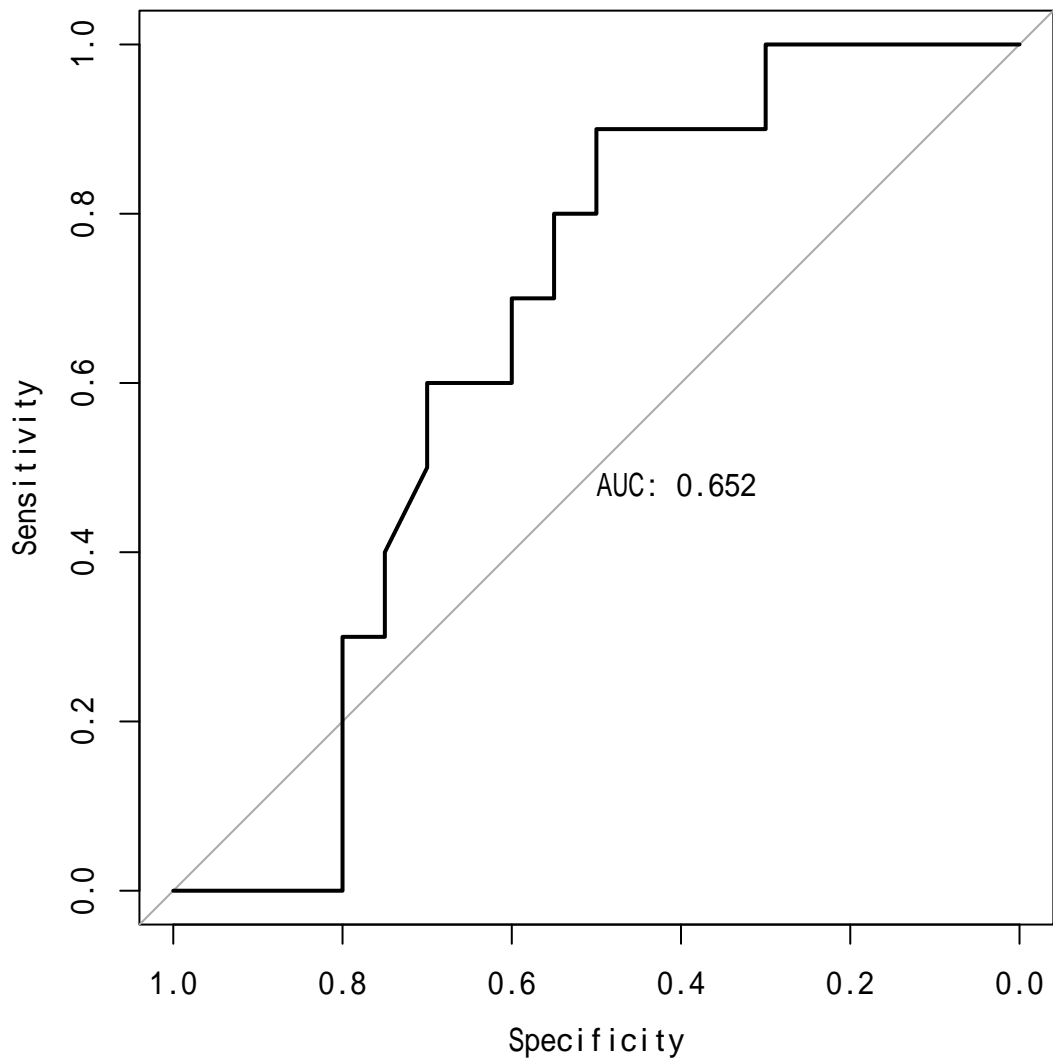

F1

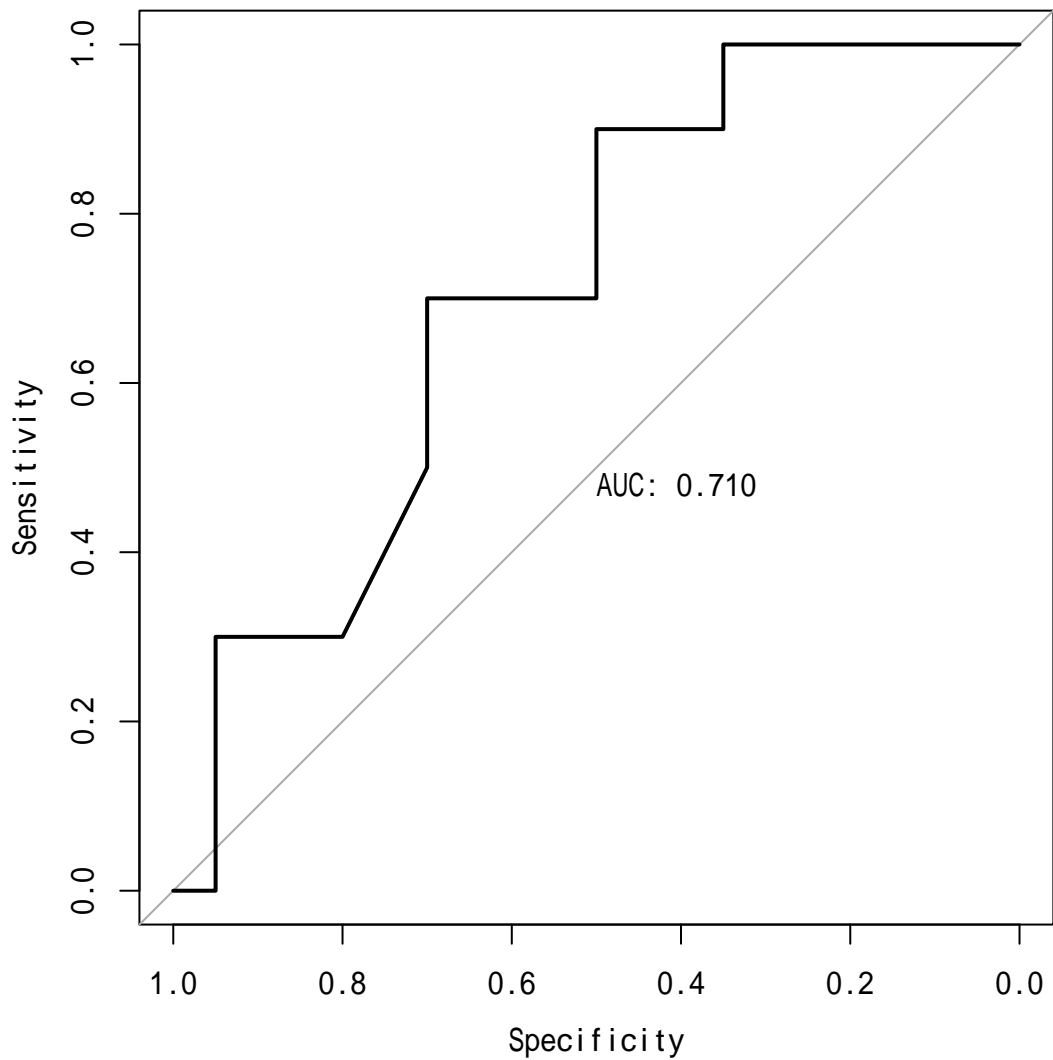



F7

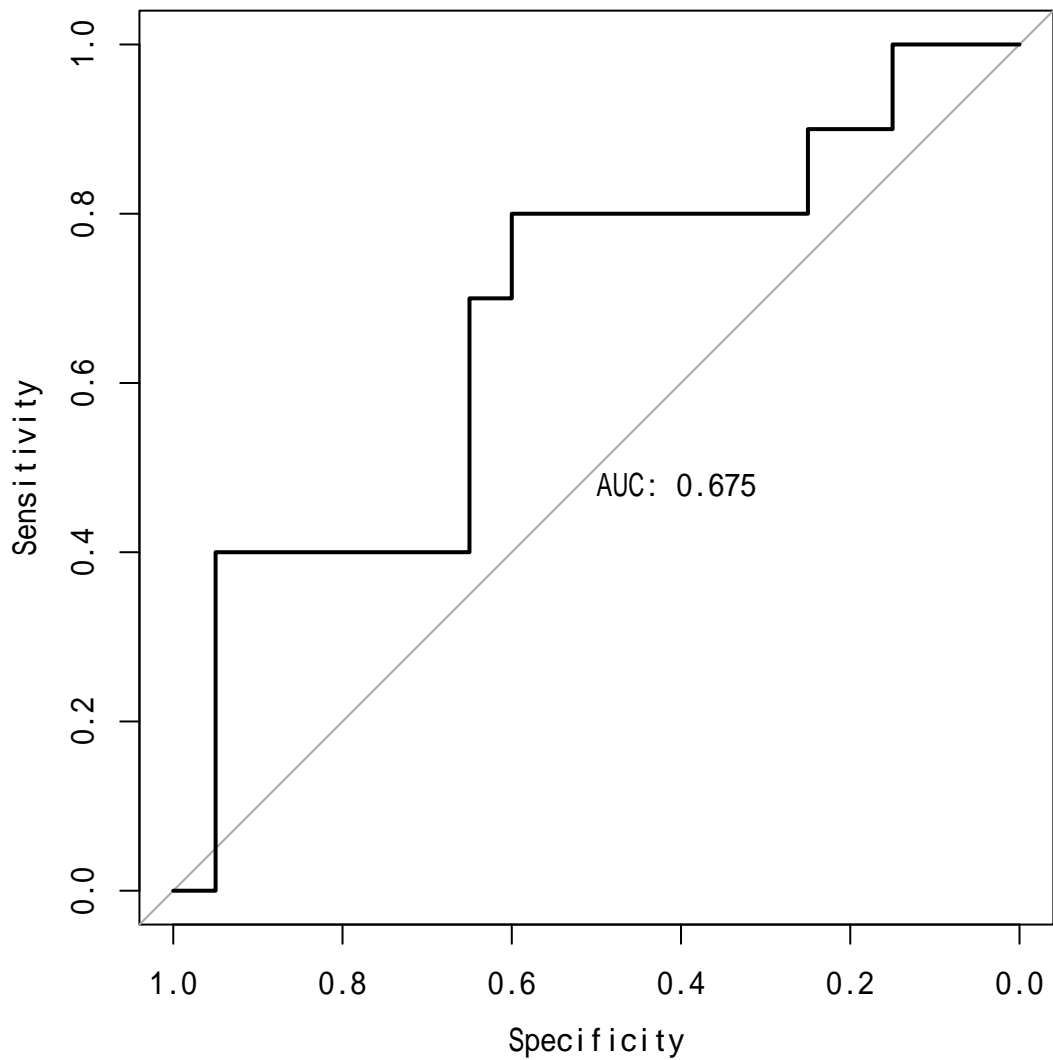

N29

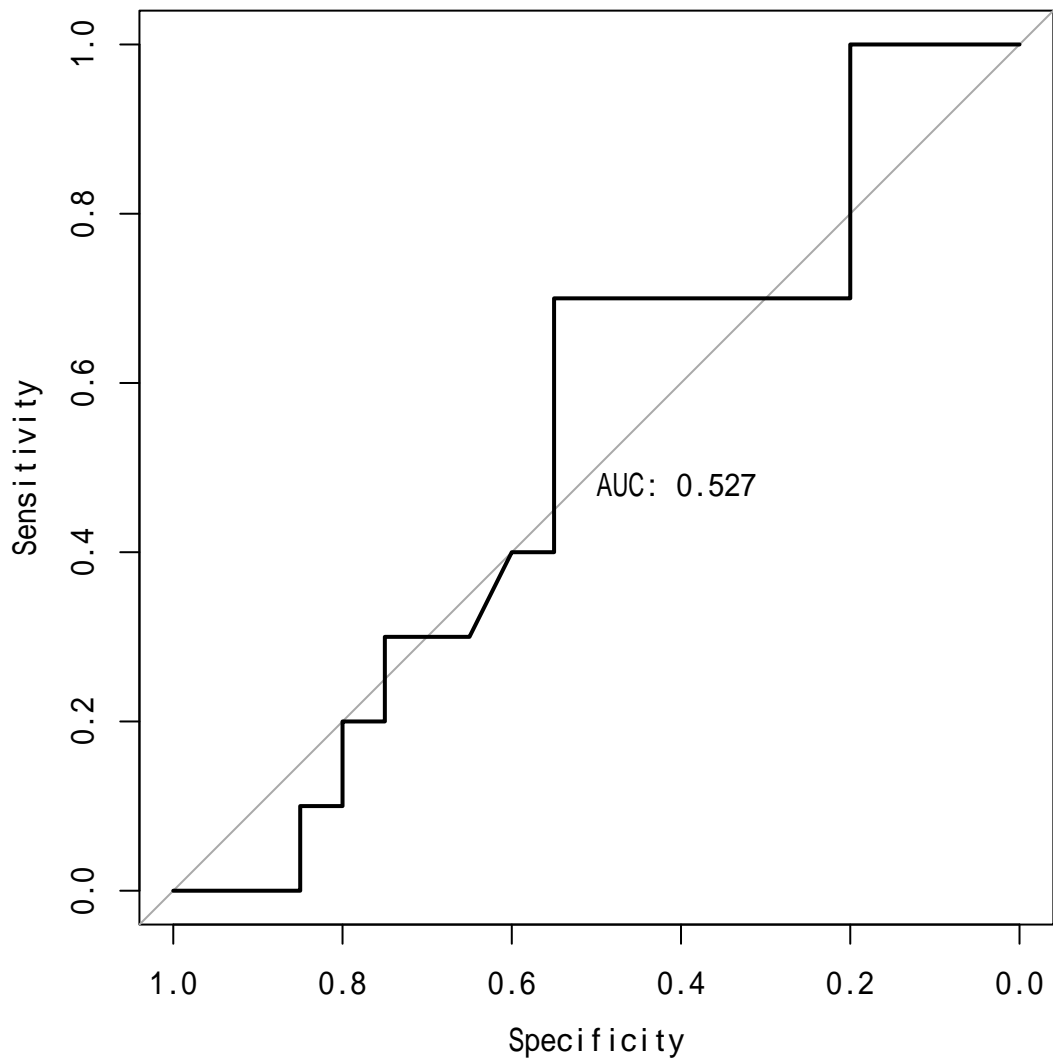

N6

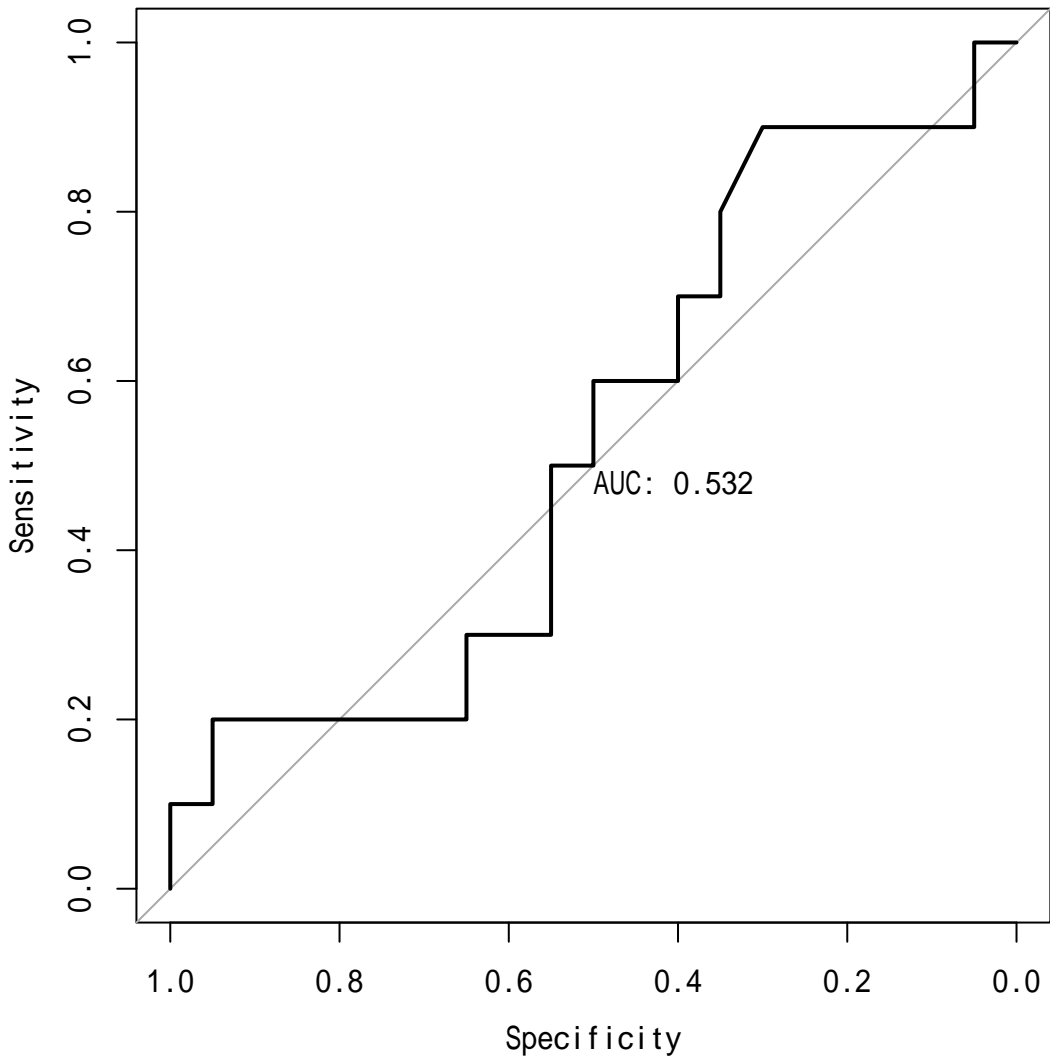

B2

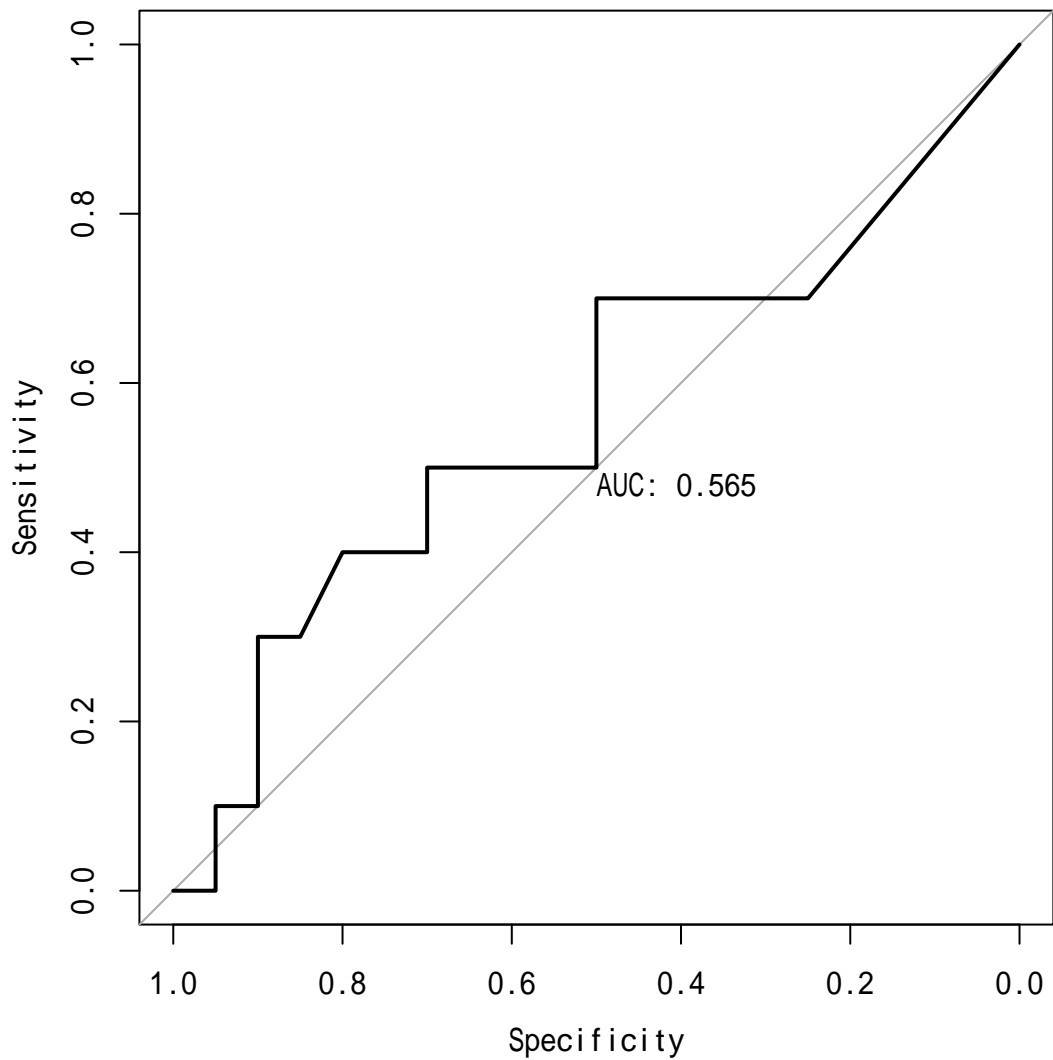

F5

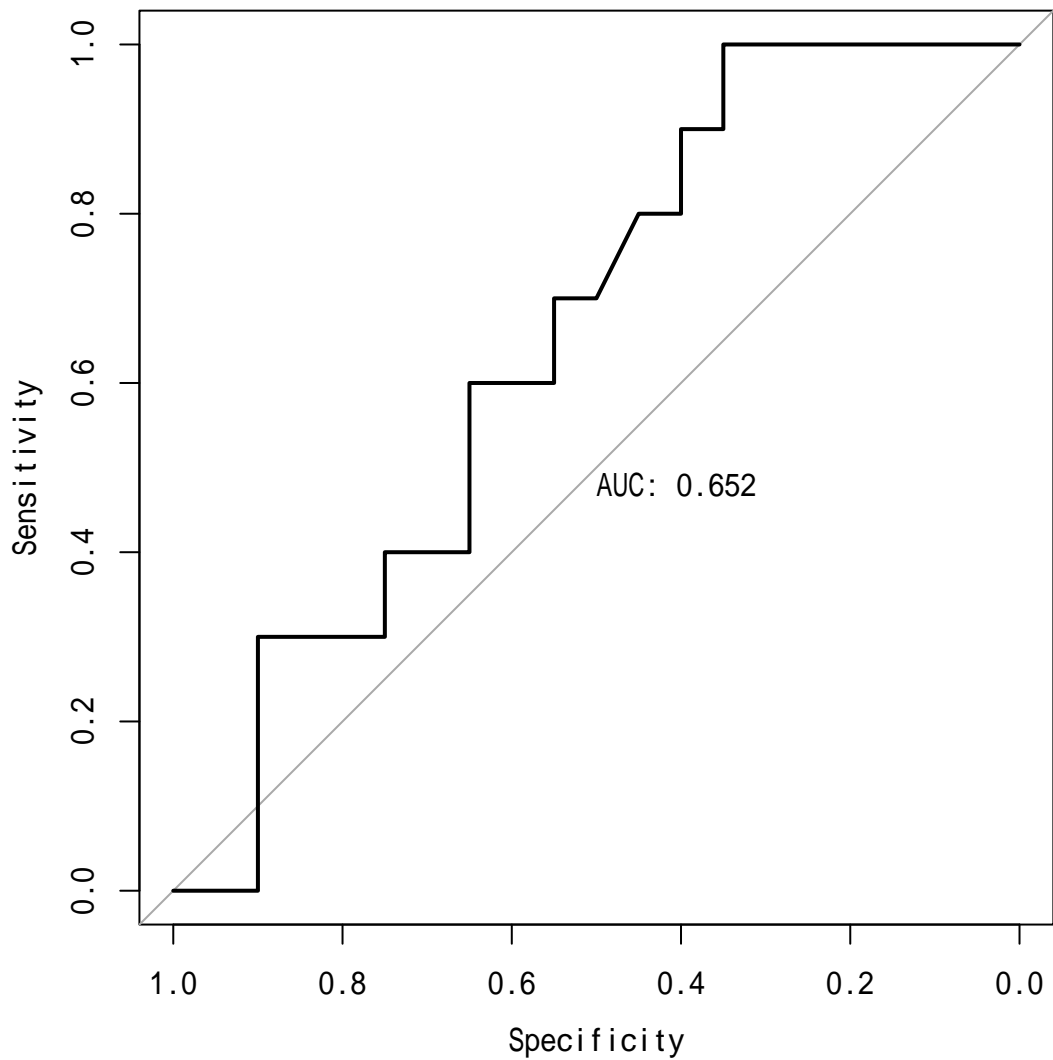

N5

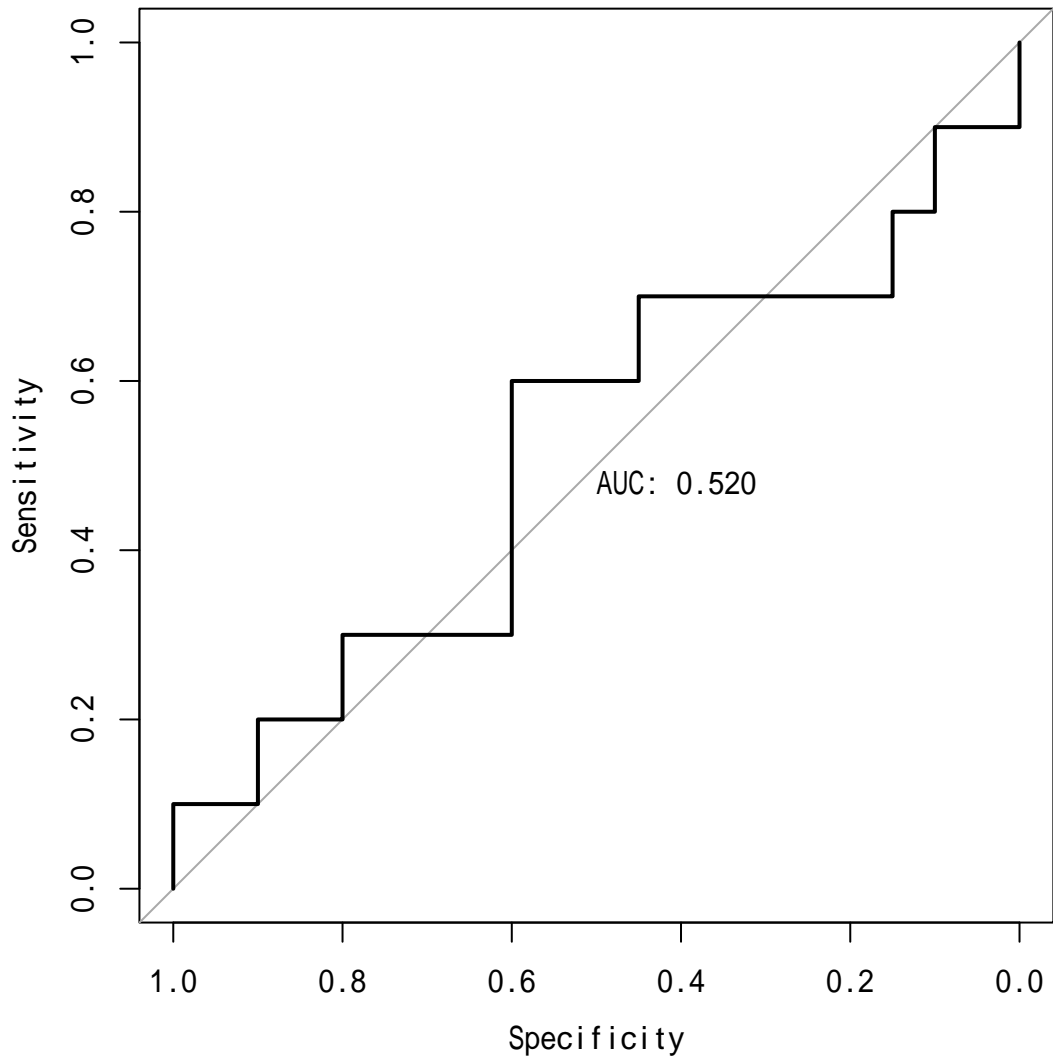

B1

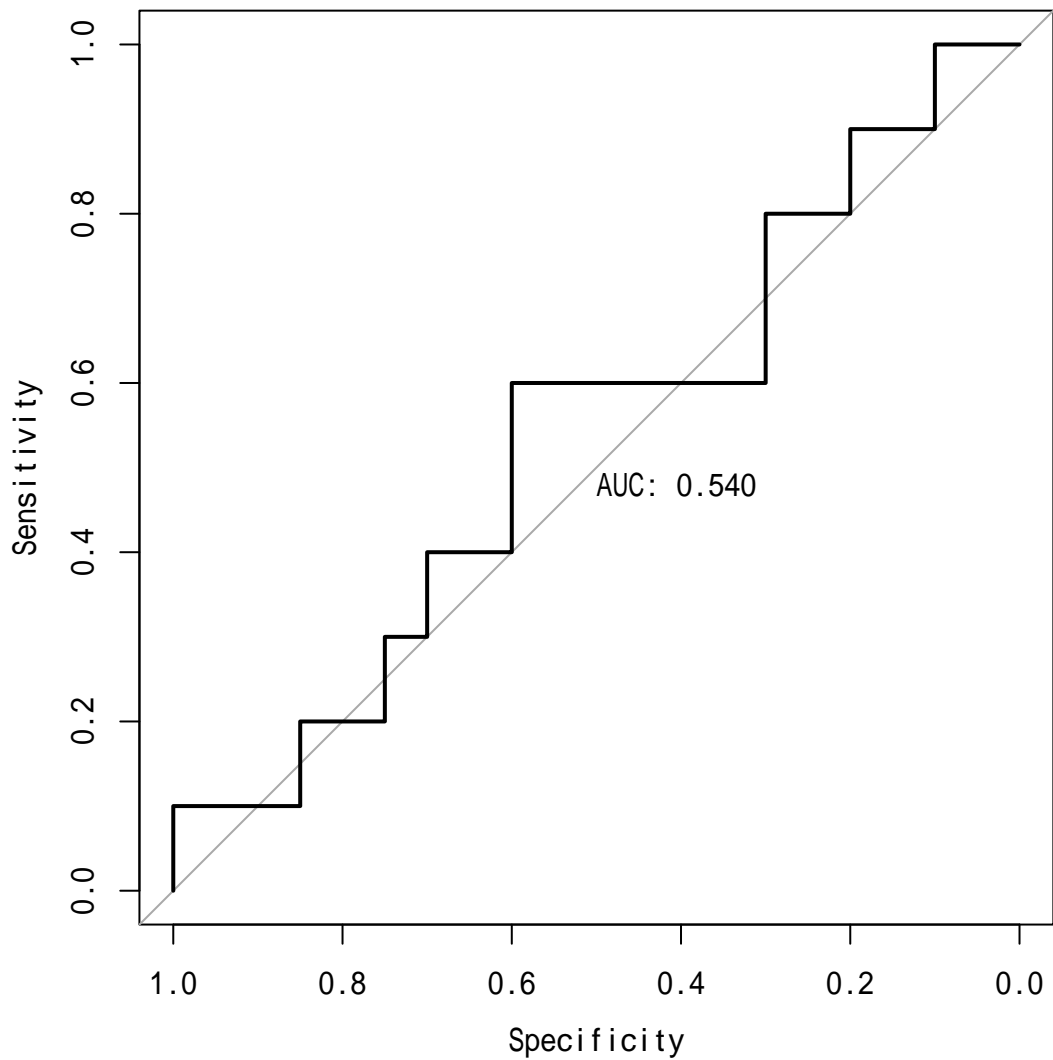

N1

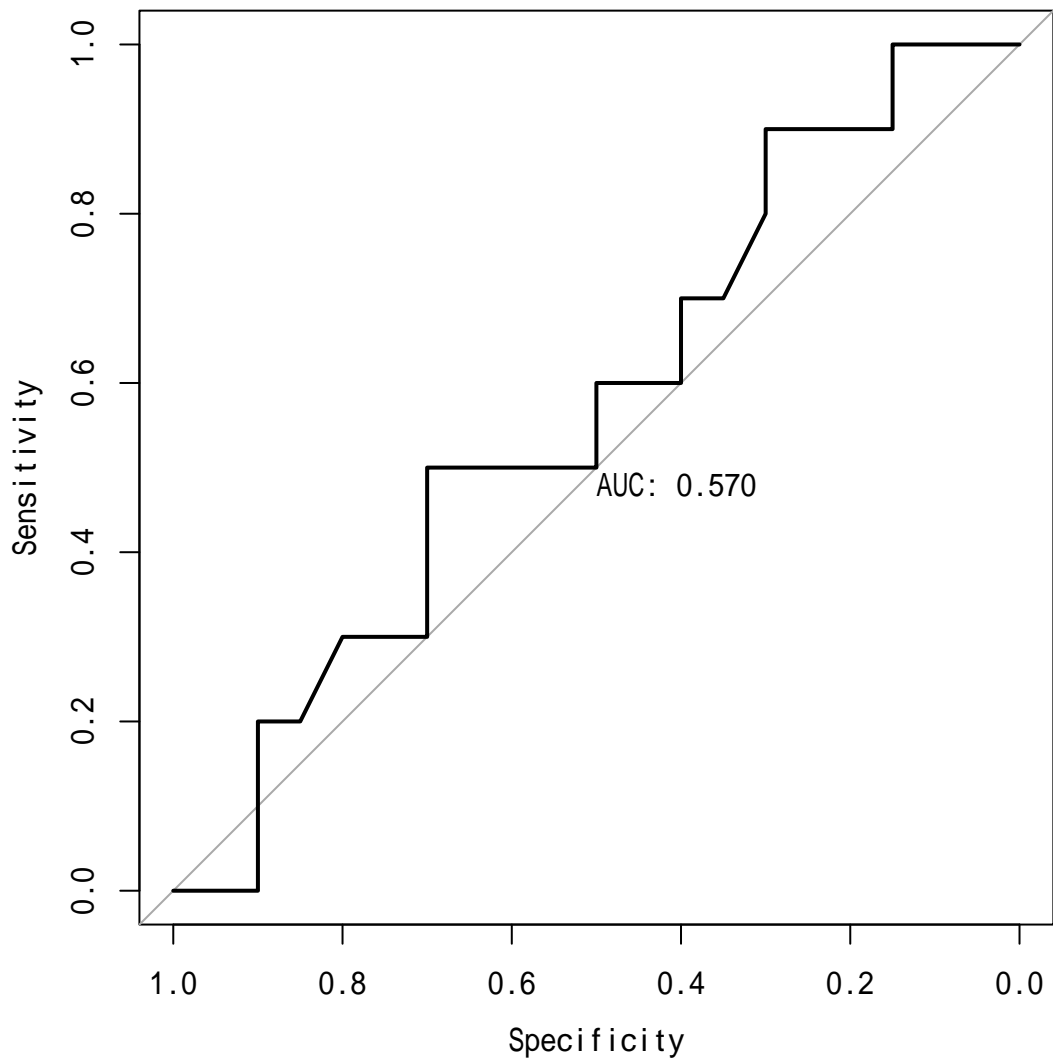



N28

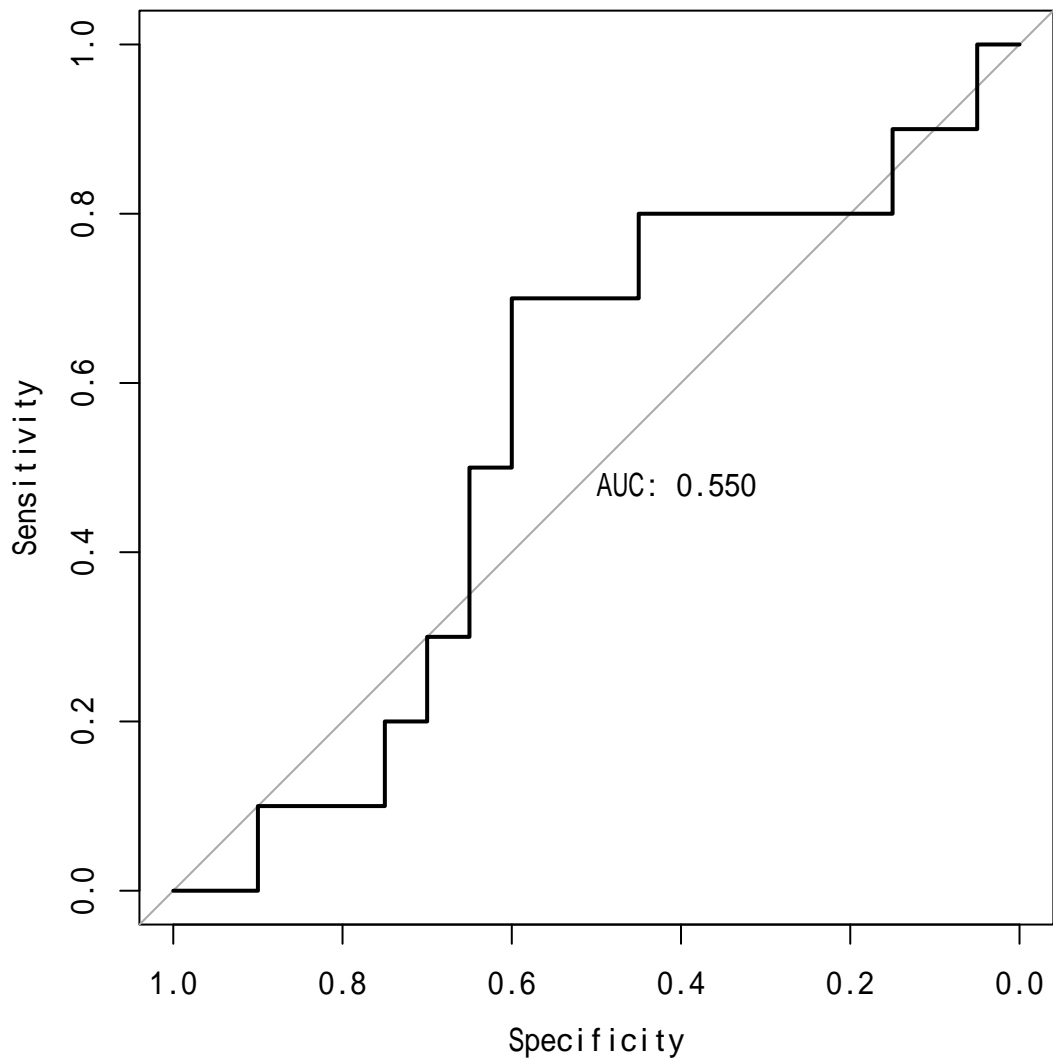

N12

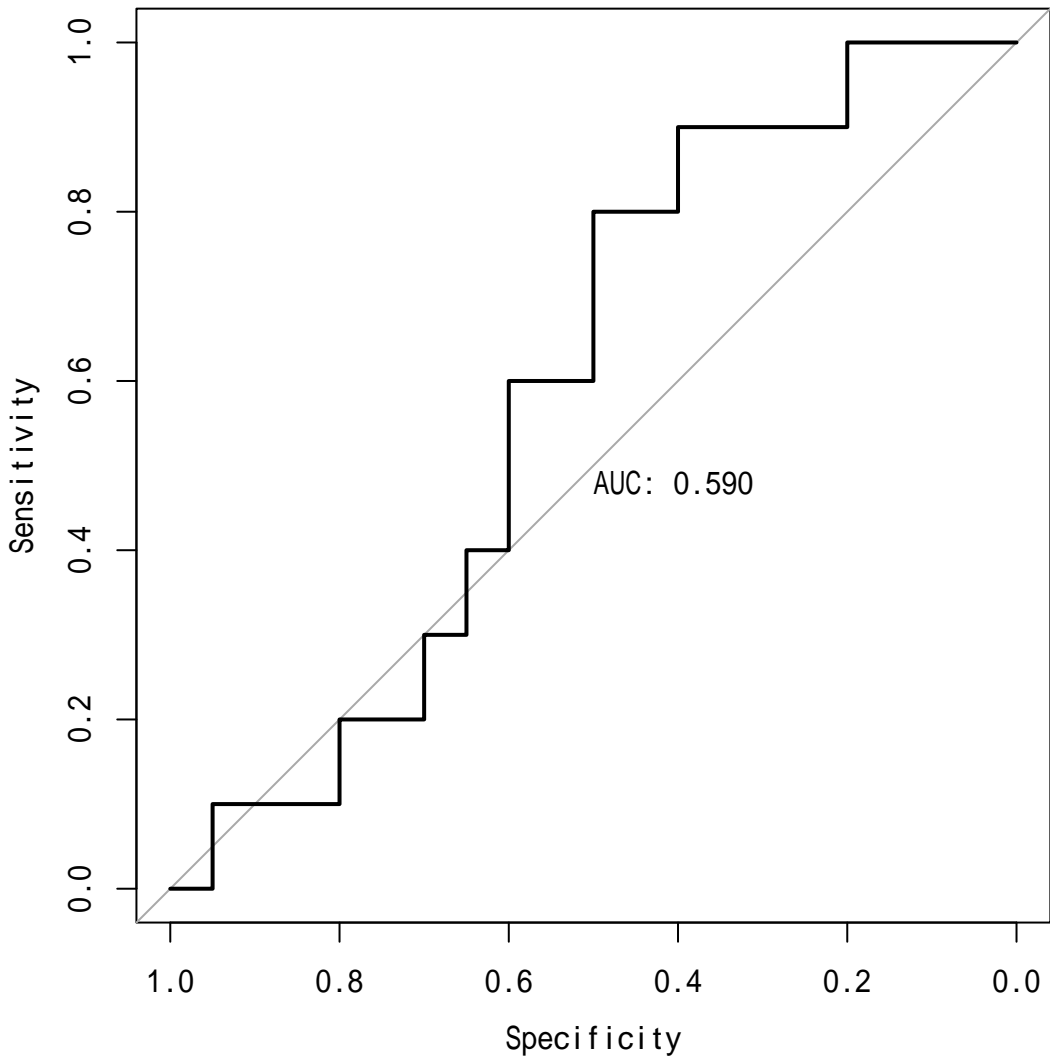

Ratio

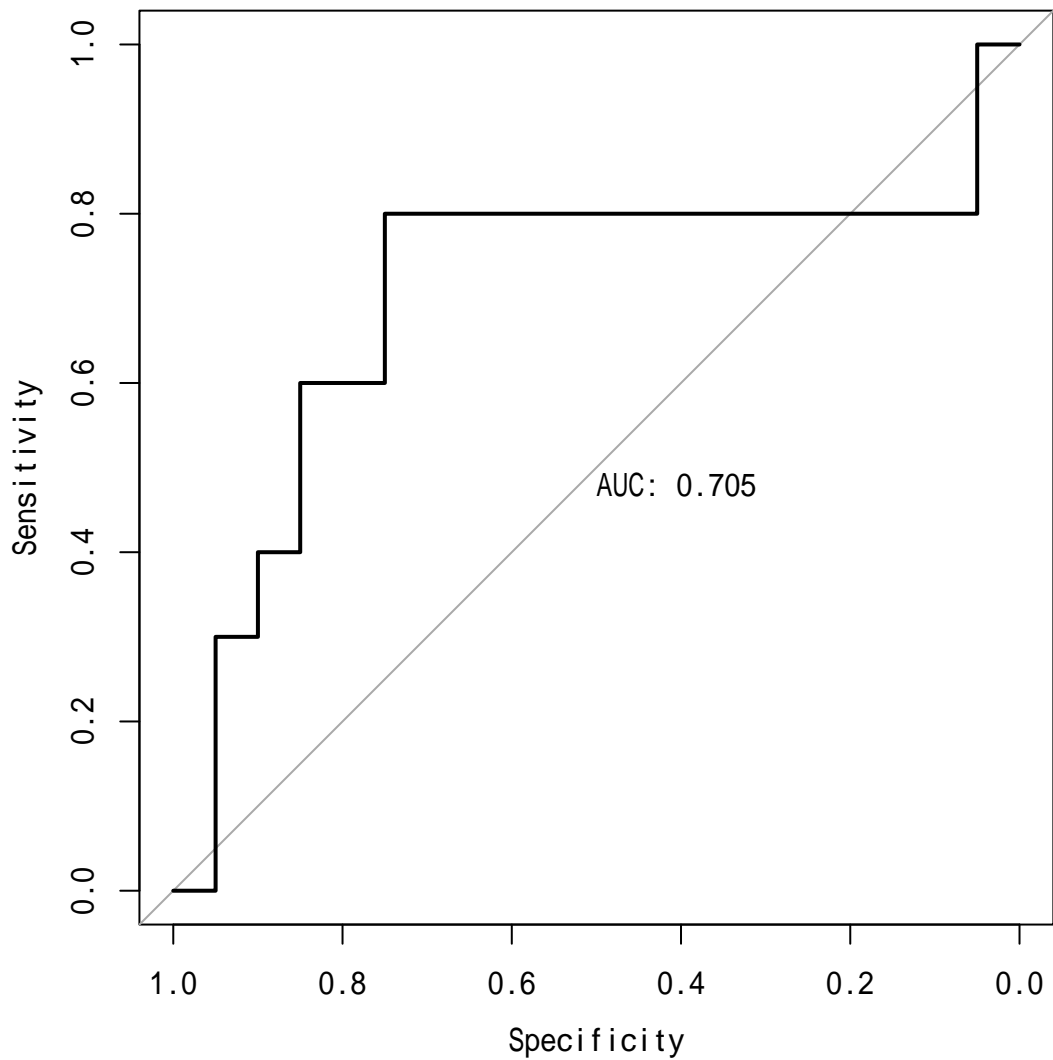

Supplement: s1 [file s1]

# Model

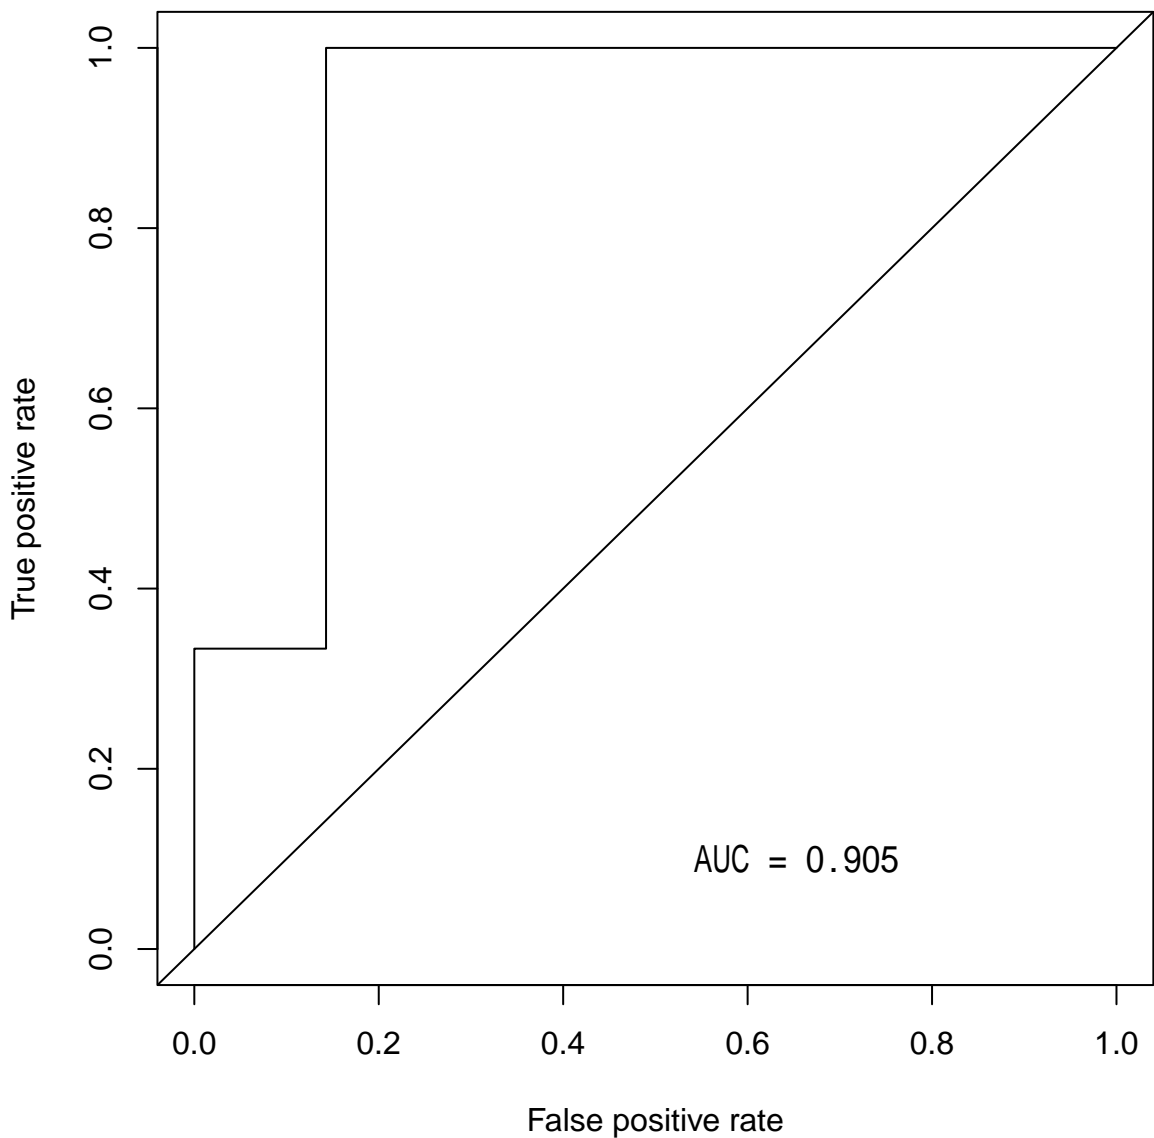

Supplement: s1 [file s1]

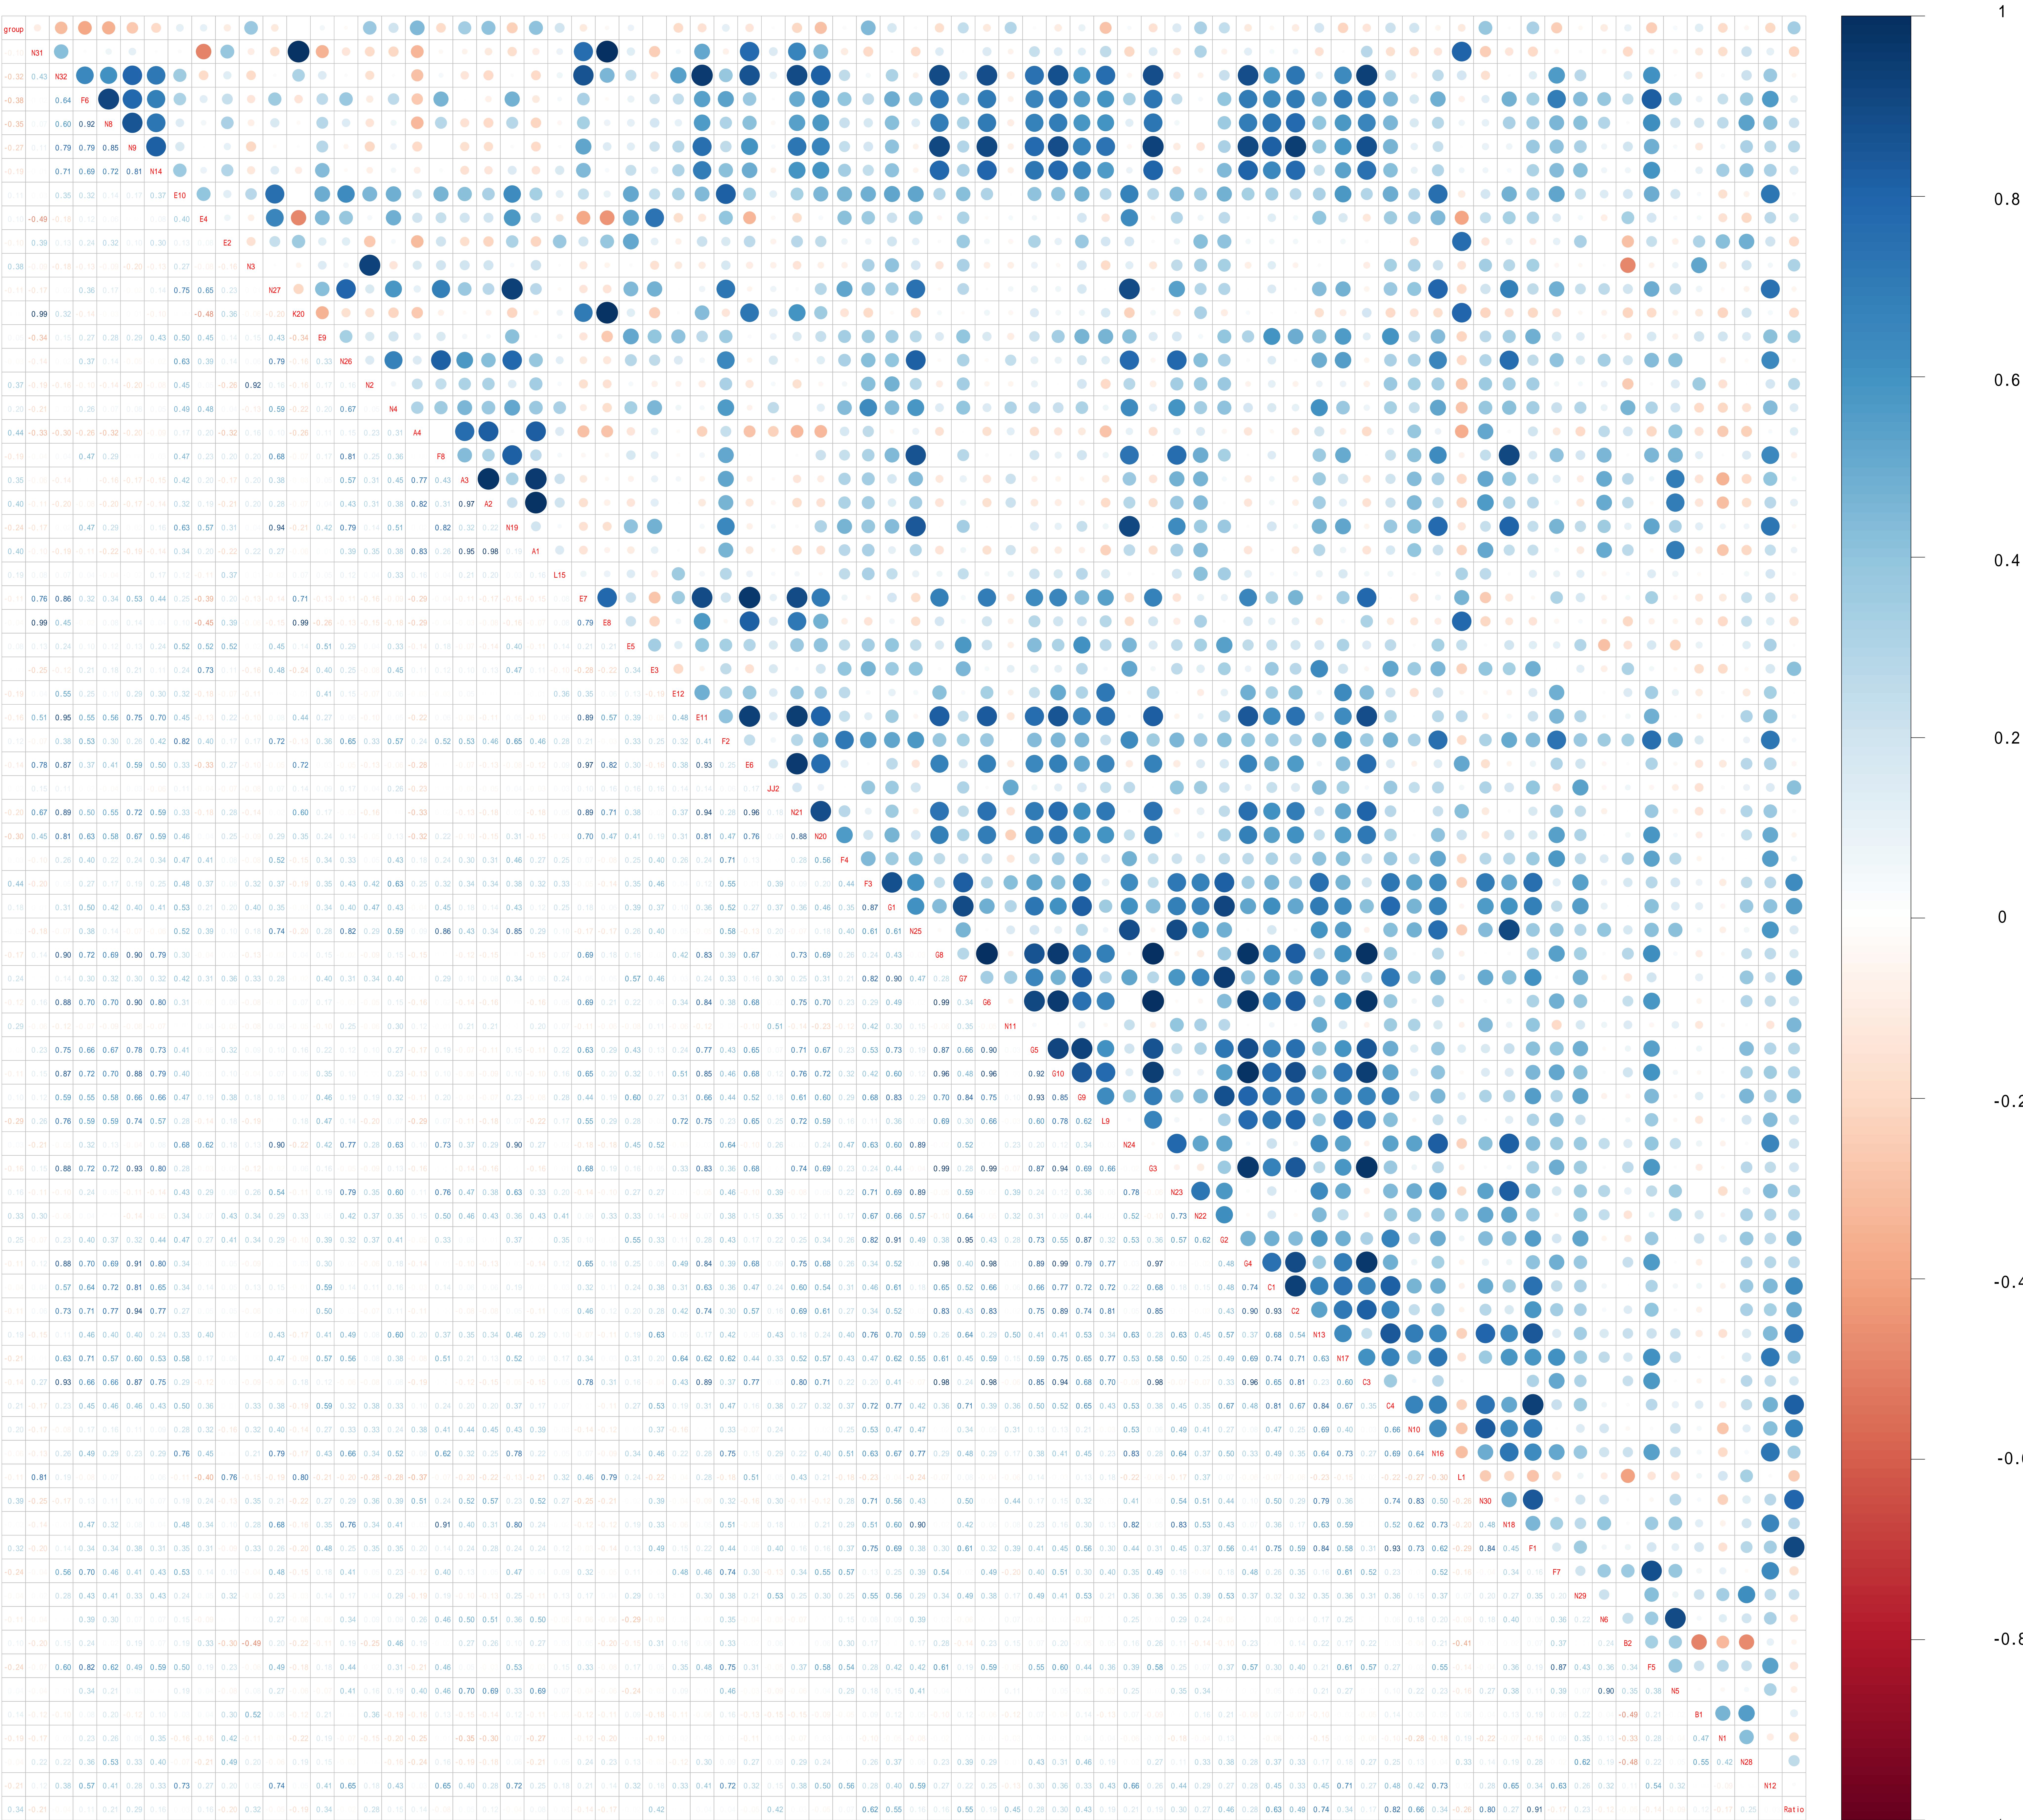

Supplement: s1 [file s1]
